# Supplementary material
Source: publisher figshare collection journal article supplement (https://gsajournals.figshare.com/ndownloader/files/24368981)
Supplement: Supplementary file 1 [file 24368981]

## Sheet: genes
Supplemental Table S1. A. N. Gale et al.
Essentiality scores of all annotated genes in C. glabrata and orthologs in S. cerevisiae
	Cg-to-Sc	pre-WGD	Cg	Cg	Cg	Cg-BG2	Cg-CBS138	Cg		Sc	Sc	Sc	Sc-BY4741	Sc		Cg-Sc	SGD	SGD
	relationship	Ancestor	ORF	name	length	% unmap	% unmap	Ess Score		ORF	name	Length	% unmap	Ess Score		∆ Ess Score	essentiality	description	notes
	1-to-1	Anc_5.524	CAGL0F03003g		3558	0.393479	0	0		YDR420W	HKR1	5409	11.3515	0		0	inviable	Mucin family member that functions as an osmosensor in the HOG pathway; functions in the Sho1p-mediated HOG pathway with Msb2p; proposed to be a negative regulator of filamentous growth; mutant displays defects in beta-1,3 glucan synthesis and bud site selection	.
	1-to-1	Anc_5.161	CAGL0G06952g	PHM3	2154	0	0	0		YJL012C	VTC4	2166	0	0.005		-0.005	inviable	Vacuolar membrane polyphosphate polymerase; subunit of the vacuolar transporter chaperone (VTC) complex involved in synthesis and transfer of polyP to the vacuole; regulates membrane trafficking; role in non-autophagic vacuolar fusion; protein abundance increases in response to DNA replication stress	.
	1-to-1	Anc_4.082	CAGL0E03003g		618	0	0	0		YGR147C	NAT2	867	0	0.04		-0.04	inviable	Protein of unknown function; has an apparent role in acetylation of N-terminal methionine residues	.
	1-to-1	Anc_7.154	CAGL0H09680g		4047	0	0	0		YER008C	SEC3	4011	0	0.07		-0.07	inviable	Subunit of the exocyst complex; the exocyst mediates polarized targeting and tethering of post-Golgi secretory vesicles to sites of exocytosis prior to SNARE-mediated fusion; PtdIns[4,5]P2-binding protein that localizes to exocytic sites in a Rho1p-dependent, actin-independent manner, targeting and anchoring the exocyst to the plasma membrane with Exo70p; direct GTP Rho1p effector; required for E…	.
	1-to-1	Anc_1.415	CAGL0B04741g	PGS1	1521	2.62985	0	0		YCL004W	PGS1	1566	0	0.305		-0.305	inviable	Phosphatidylglycerolphosphate synthase; catalyzes the synthesis of phosphatidylglycerolphosphate from CDP-diacylglycerol and sn-glycerol 3-phosphate in the first committed and rate-limiting step of cardiolipin biosynthesis	.
	1-to-1	Anc_8.767	CAGL0A03784g		546	0	0	0		YOR297C	TIM18	579	0	0.385		-0.385	inviable	Component of the mitochondrial TIM22 complex; involved in insertion of polytopic proteins into the inner membrane; may mediate assembly or stability of the complex	.
	1-to-1	Anc_3.534	CAGL0C02343g	ARB1	2561	6.13042	0	0		YER036C	ARB1	1833	0	0.425		-0.425	inviable	ATPase of the ATP-binding cassette (ABC) family; involved in 40S and 60S ribosome biogenesis, has similarity to Gcn20p; shuttles from nucleus to cytoplasm, physically interacts with Tif6p, Lsg1p	.
	1-to-1	Anc_2.588	CAGL0M13079g		615	0	0	0.005		YKL052C	ASK1	879	0	0.005		0	inviable	Essential subunit of the Dam1 complex (aka DASH complex); couples kinetochores to the force produced by MT depolymerization thereby aiding in chromosome segregation; phosphorylated during the cell cycle by cyclin-dependent kinases; protein abundance increases in response to DNA replication stress	.
	1-to-1	Anc_8.743	CAGL0L11066g		837	0	0	0.005		YOR281C	PLP2	861	0	0.37		-0.365	inviable	Protein that interacts with the CCT complex to stimulate actin folding; has similarity to phosducins; null mutant lethality is complemented by mouse phosducin-like protein MgcPhLP; CCT is short for chaperonin containing TCP-1; essential gene	.
	1-to-1	Anc_3.410	CAGL0K01067g		555	0.0900901	0	0.01		YGR082W	TOM20	552	0	0.135		-0.125	inviable	Component of the TOM (translocase of outer membrane) complex; responsible for recognition and initial import steps for all mitochondrially directed proteins; acts as a receptor for incoming precursor proteins	.
	1-to-1	Anc_8.210	CAGL0I08569g		2334	0	0	0.01		YER157W	COG3	2406	0	0.295		-0.285	inviable	Essential component of the conserved oligomeric Golgi complex; a cytosolic tethering complex (Cog1p through Cog8p) that functions in protein trafficking to mediate fusion of transport vesicles to Golgi compartments	.
	1-to-1	Anc_8.865	CAGL0I06380g	RPM2	3591	0.125313	0	0.015		YML091C	RPM2	3609	0	0.445		-0.43	inviable	Protein subunit of mitochondrial RNase P; has roles in nuclear transcription, cytoplasmic and mitochondrial RNA processing, and mitochondrial translation; distributed to mitochondria, cytoplasmic processing bodies, and the nucleus	.
	1-to-1	Anc_8.077	CAGL0L08778g		1203	0	0	0.02		YPL011C	TAF3	1062	0	0		0.02	inviable	TFIID subunit (47 kDa); involved in promoter binding and RNA polymerase II transcription initiation	.
	1-to-1	Anc_8.048	CAGL0K07700g		2748	8.84279	0	0.02		YFL023W	BUD27	2391	0	0.035		-0.015	inviable	Unconventional prefoldin protein involved in translation initiation; required for correct assembly of RNAP I, II, and III in an Rpb5p-dependent manner; shuttles between nucleus and cytoplasm; mutants have inappropriate expression of nutrient sensitive genes due to translational derepression of Gcn4p transcription factor; diploid mutants show random budding; ortholog of human URI/RMP	.
	1-to-1	Anc_4.070	CAGL0D06138g	HEM2	1023	0	0	0.02		YGL040C	HEM2	1029	0	0.275		-0.255	inviable	Aminolevulinate dehydratase; a homo-octameric enzyme, catalyzes the conversion of 5-aminolevulinate to porphobilinogen, the second step in heme biosynthesis; enzymatic activity is zinc-dependent; localizes to the cytoplasm and nucleus	.
	1-to-1	Anc_8.285	CAGL0M11473g		268	0.373134	0	0.025		YLR099W-A	MIM2	264	0	0		0.025	inviable	Mitochondrial protein required for outer membrane protein import; involved in import of the subset of proteins with multiple alpha-helical transmembrane segments, including Ugo1p, Tom20p, and Fzo1p; component of a large protein complex in the outer membrane that includes Mim1p; not essential in W303 strain background	.
	1-to-1	Anc_2.174	CAGL0G06688g	MET4	2013	0	0	0.035		YNL103W	MET4	2019	0	0		0.035	inviable	Leucine-zipper transcriptional activator; responsible for regulation of sulfur amino acid pathway; requires different combinations of auxiliary factors Cbf1p, Met28p, Met31p and Met32p; feedforward loop exists in the regulation of genes controlled by Met4p and Met32p; can be ubiquitinated by ubiquitin ligase SCF-Met30p, is either degraded or maintained in an inactive state; regulates degradation …	.
	1-to-1	Anc_8.824	CAGL0J06556g		3237	0	0	0.035		YML104C	MDM1	3384	0	0.005		0.03	inviable	Intermediate filament protein; required for nuclear and mitochondrial transmission to daughter buds; contains a Phox homology (PX) domain and specifically binds phosphatidylinositol 3-phosphate (PtdIns-3-P)	.
	1-to-1	Anc_1.398	CAGL0H03707g		1050	0	0	0.045		YNL007C	SIS1	1059	0	0.275		-0.23	inviable	Type II HSP40 co-chaperone that interacts with the HSP70 protein Ssa1p; shuttles between the cytosol and nucleus to mediate delivery of misfolded proteins into the nucleus for degradation; not functionally redundant with Ydj1p due to substrate specificity; protein abundance increases in response to DNA replication stress; polyQ aggregates sequester Sis1p and interfere with clearance of misfolded …	.
	1-to-1	Anc_2.155	CAGL0L04004g		2907	0	0	0.055		YNL118C	DCP2	2913	0	0.005		0.05	inviable	Catalytic subunit of the Dcp1p-Dcp2p decapping enzyme complex; removes the 5' cap structure from mRNAs prior to their degradation; nudix hydrolase family member; forms cytoplasmic foci upon DNA replication stress	.
	1-to-1	Anc_5.012	CAGL0G00264g		867	0	0	0.06		YGR280C	PXR1	816	0	0.44		-0.38	inviable	Essential protein involved in rRNA and snoRNA maturation; competes with TLC1 RNA for binding to Est2p, suggesting a role in negative regulation of telomerase; human homolog inhibits telomerase; contains a G-patch RNA interacting domain	.
	1-to-1	Anc_5.661	CAGL0L10340g		840	0	0	0.065		YOR060C	SLD7	774	0	0.41		-0.345	inviable	Protein with a role in chromosomal DNA replication; interacts with Sld3p and reduces its affinity for Cdc45p; deletion mutant has aberrant mitochondria	.
	1-to-1	Anc_3.126	CAGL0I07953g		3708	0	0	0.07		YOL078W	AVO1	3531	0	0.16		-0.09	inviable	Component of a membrane-bound complex containing the Tor2p kinase; contains Tor2p kinase and other proteins; may have a role in regulation of cell growth	.
	1-to-1	Anc_1.086	CAGL0G03861g		933	0.857449	0	0.075		YGR046W	TAM41	1158	0	0.11		-0.035	inviable	Mitochondrial phosphatidate cytidylyltransferase (CDP-DAG synthase); required for cardiolipin biosynthesis; viability of null mutant is strain-dependent; mRNA is targeted to the bud; mutant displays defect in mitochondrial protein import, likely due to altered membrane lipid composition	.
	1-to-1	Anc_8.543	CAGL0H05379g		3054	0	0	0.08		YPL075W	GCR1	3109	0	0.225		-0.145	inviable	Transcriptional activator of genes involved in glycolysis; DNA-binding protein that interacts and functions with the transcriptional activator Gcr2p	.
	1-to-1	Anc_2.056	CAGL0G05588g		2262	0.243148	0	0.08		YDL220C	CDC13	2775	0	0.36		-0.28	inviable	Single stranded DNA-binding protein found at TG1-3 telomere G-tails; key roles in regulation of telomerase, telomere end protection, and conventional telomere replication; regulates telomere replication through recruitment of specific sub-complexes, but the essential function is telomere capping; autophagy and proteasome are involved in Cdc13p degradation; differentially phosphorylated as a funct…	.
	1-to-1	Anc_5.303	CAGL0F09009g		1113	0.808625	0	0.085		YHR040W	BCD1	1101	0	0.41		-0.325	inviable	Essential protein required for the accumulation of box C/D snoRNA	.
	1-to-1	Anc_5.020	CAGL0M13739g	ATM1	2184	0.160256	0	0.09		YMR301C	ATM1	2073	0	0.495		-0.405	inviable	Mitochondrial inner membrane ATP-binding cassette (ABC) transporter; exports mitochondrially synthesized precursors of iron-sulfur (Fe/S) clusters to the cytosol	.
	1-to-1	Anc_6.081	CAGL0G09735g		1923	2.70411	0	0.12		YOR181W	LAS17	1902	0	0.015		0.105	inviable	Actin assembly factor; C-terminal WCA domain activates Arp2/3 complex-mediated nucleation of branched actin filaments and a polyproline domain which can nucleate actin filaments independent of Arp2/3; mutants are defective in actin cytoskeleton dependent processes such as: endocytosis, bud site selection and cytokinesis; localizes with the Arp2/3 complex to actin cortical patches; homolog of the …	.
	1-to-1	Anc_7.119	CAGL0F01221g		378	0	0	0.125		YOL026C	MIM1	342	0	0.07		0.055	inviable	Mitochondrial protein required for outer membrane protein import; cooperates with Tom70p to import the subset of proteins with multiple alpha-helical transmembrane segments, including Ugo1p, Tom20p, and others; present in a complex with Mim2p in the outer membrane that may create a local environment to facilitate membrane insertion of substrate proteins; also has a role in assembly of Tom20p into…	.
	1-to-1	Anc_2.124	CAGL0J05676g	INN1	1275	0	0	0.145		YNL152W	INN1	1230	0	0.245		-0.1	inviable	Essential protein that associates with contractile actomyosin ring; required for ingression of the plasma membrane into the bud neck during cytokinesis; C2 domain, a membrane targeting module, is required for function; activates chitin synthase activity of Chs2p during cytokinesis	.
	1-to-1	Anc_1.119	CAGL0J07656g	SLA2	2859	0	0	0.15		YNL243W	SLA2	2907	0	0.235		-0.085	inviable	Adaptor protein that links actin to clathrin and endocytosis; involved in membrane cytoskeleton assembly and cell polarization; present in the actin cortical patch of the emerging bud tip; dimer in vivo	.
	1-to-1	Anc_7.160	CAGL0J01892g	PAN1	4125	0.557576	0	0.15		YIR006C	PAN1	4443	0	0.25		-0.1	inviable	Part of actin cytoskeleton-regulatory complex Pan1p-Sla1p-End3p; associates with actin patches on cell cortex; promotes protein-protein interactions essential for endocytosis; binds to and activates Arp2/3 complex in vitro; phosphorylation of Thr-1225 is regulated by MAPK Hog1p in response to osmotic stress; previously thought to be a subunit of poly(A) ribonuclease	.
	1-to-1	Anc_8.592	CAGL0M06061g	PEX32	1305	0	0	0.16		YBR168W	PEX32	1242	0	0.315		-0.155	inviable	Peroxisomal integral membrane protein; involved in negative regulation of peroxisome size; partially functionally redundant with Pex31p; genetic interactions suggest action at a step downstream of steps mediated by Pex28p and Pex29p	.
	1-to-1	Anc_5.148	CAGL0B03899g		255	0	0	0.175		YJR012C		624	0	0		0.175	inviable	Essential protein of unknown function; proposed involvement in transport based on mass spectrometry analysis of copurifying proteins; partially overlaps neighboring ORF, GPI14/YJR013W	viable in Sc when deletion does not overlap essential neighbor
	1-to-1	Anc_7.377	CAGL0A04345g		1179	0.169635	0	0.195		YBL058W	SHP1	1272	0	0.01		0.185	inviable	UBX (ubiquitin regulatory X) domain-containing protein; regulates Glc7p phosphatase activity and interacts with Cdc48p; interacts with ubiquitylated proteins in vivo and is required for degradation of a ubiquitylated model substrate	.
	1-to-1	Anc_3.575	CAGL0A04741g		1611	0	0	0.265		YFR051C	RET2	1641	0	0.055		0.21	inviable	Delta subunit of the coatomer complex (COPI); COPI coats Golgi-derived transport vesicles; involved in retrograde transport between Golgi and ER	.
	1-to-1	Anc_4.169	CAGL0K03993g		474	0.21097	0	0.27		YGR030C	POP6	477	0	0.31		-0.04	inviable	Subunit of both RNase MRP and nuclear RNase P; RNase MRP cleaves pre-rRNA, while nuclear RNase P cleaves tRNA precursors to generate mature 5' ends and facilitates turnover of nuclear RNAs; relocalizes to the cytosol in response to hypoxia	.
	1-to-1	Anc_7.524	CAGL0I08525g		600	0	0	0.325		YPR168W	NUT2	474	0	0.025		0.3	inviable	Subunit of the RNA polymerase II mediator complex; associates with core polymerase subunits to form the RNA polymerase II holoenzyme; required for transcriptional activation and has a role in basal transcription; protein abundance increases in response to DNA replication stress	.
	1-to-1	Anc_8.347	CAGL0M04477g		1692	0.531915	0	0.355		YLR141W	RRN5	1092	0	0.025		0.33	inviable	Protein involved in transcription of rDNA by RNA polymerase I; transcription factor, member of UAF (upstream activation factor) family along with Rrn9p and Rrn10p	.
	1-to-1	Anc_8.453	CAGL0B02607g	HEM1	1593	0	0	0.44		YDR232W	HEM1	1647	0	0.115		0.325	inviable	5-aminolevulinate synthase; catalyzes the first step in the heme biosynthetic pathway; an N-terminal signal sequence is required for localization to the mitochondrial matrix; expression is regulated by Hap2p-Hap3p	.
	1-to-1	Anc_2.186	CAGL0L03784g		2622	0	0	0.45		YOR098C	NUP1	3231	0	0.035		0.415	inviable	FG-nucleoporin component of central core of the nuclear pore complex; contributes directly to nucleocytoplasmic transport and maintenance of thenuclear pore complex (NPC) permeability barrier; possible karyopherin release factor that accelerates release of karyopherin-cargo complexes after transport across NPC; both NUP1 and NUP60 are homologous to human NUP153	.
	1-to-1	Anc_5.534	CAGL0F03135g		1188	0.3367	0	0.92		YDR427W	RPN9	1182	0	0		0.92	inviable	Non-ATPase regulatory subunit of the 26S proteasome; similar to putative proteasomal subunits in other species; null mutant is temperature sensitive and exhibits cell cycle and proteasome assembly defects; protein abundance increases in response to DNA replication stress; relocalizes to the cytosol in response to hypoxia	.
	1-to-1	Anc_3.468	CAGL0D04818g		1149	7.13664	0	0.51		YPR133C	SPN1	1233	0	0.145		0.365	inviable	Protein involved in RNA polymerase II transcription; is constitutively recruited to the CYC1 promoter and is required for recruitment of chromatin remodeling factors for the expression of CYC1 gene; interacts genetically or physically with RNAP II, TBP, TFIIS, and chromatin remodelling factors; central domain highly conserved throughout eukaryotes; mutations confer an Spt- phenotype	.
	1-to-1	Anc_8.456	CAGL0J09680g		990	0.454545	0	0.53		YDL205C	HEM3	984	0	0.42		0.11	inviable	Porphobilinogen deaminase; catalyzes the conversion of 4-porphobilinogen to hydroxymethylbilane, the third step in heme biosynthesis; localizes to the cytoplasm and nucleus; expression is regulated by Hap2p-Hap3p, but not by levels of heme	.
	1-to-1	Anc_7.253	CAGL0M12617g		978	0	0	0.575		YIL063C	YRB2	984	0	0.025		0.55	inviable	Protein of unknown function; involved in nuclear processes of the Ran-GTPase cycle; involved in nuclear protein export; contains Ran Binding Domain and FxFG repeats; interacts with Srm1p, GTP-Gsp1p, Rna1p and Crm1p; relocalizes to the cytosol in response to hypoxia; not essential for viability	.
	1-to-1	Anc_4.284	CAGL0D00440g		555	1.17117	0	0.625		YKL186C	MTR2	722	0	0.48		0.145	inviable	mRNA transport regulator; essential nuclear protein; Mex67p and Mtr2p form a mRNA export complex which binds to RNA	.
	1-to-1	Anc_7.150	CAGL0H09724g		1560	0	0	0.665		YER006W	NUG1	1563	0	0.28		0.385	inviable	GTPase that associates with nuclear 60S pre-ribosomes; required for export of 60S ribosomal subunits from the nucleus	.
	1-to-1	Anc_1.278	CAGL0L02981g		708	0	0	0.68		YKR022C	NTR2	969	0	0.22		0.46	inviable	Essential protein that forms a dimer with Ntr1p; also forms a trimer, with Ntr2p and the DExD/H-box RNA helicase Prp43p, that is involved in spliceosome disassembly	.
	1-to-1	Anc_5.292	CAGL0D04114g	NCP1	2064	0	0	0.705		YHR042W	NCP1	2076	0	0.36		0.345	inviable	NADP-cytochrome P450 reductase; involved in ergosterol biosynthesis; associated and coordinately regulated with Erg11p	.
	1-to-1	Anc_4.371	CAGL0D02761g		341	0	0	0.725		YHR199C-A	NBL1	289	0	0.295		0.43	inviable	Subunit of the conserved chromosomal passenger complex (CPC); complex regulates mitotic chromosome segregation; not required for the kinase activity of the complex; mediates the interaction of Sli15p and Bir1p; other complex members are Ipl1p, Sli15p, and Bir1p	.
	1-to-1	Anc_8.357	CAGL0E00957g		2946	1.12016	0	0.825		YDR166C	SEC5	2916	0	0.415		0.41	inviable	Essential 107kDa subunit of the exocyst complex; the exocyst mediates polarized targeting and tethering of post-Golgi secretory vesicles to active sites of exocytosis at the plasma membrane prior to SNARE-mediated fusion; involved in assembly of the exocyst complex; required with Sec3p for ER inheritance where it promotes anchoring of the cortical ER at the bud tip	.
	1-to-1	Anc_2.486	CAGL0F07557g		888	0	0	0.905		YKL095W	YJU2	837	0	0.16		0.745	inviable	Essential protein required for pre-mRNA splicing; associates transiently with the spliceosomal NTC ("nineteen complex") and acts after Prp2p to promote the first catalytic reaction of splicing	.
	1-to-1	Anc_2.397	CAGL0K03927g		708	0	0	0.925		YMR134W	ERG29	714	0	0.015		0.91	inviable	Protein of unknown function involved in ergosterol biosynthesis; conditional mutants produce less ergosterol, display impaired oxygen consumption, respiratory growth, mitochondrial iron utilization, and are more sensitive to oxidative stress; mutant bm-8 has a growth defect on iron-limited medium that is complemented by overexpression of Yfh1p; protein localizes to the cytoplasm, ER and nuclear e…	.
	1-to-1	Anc_8.464	CAGL0K11132g		1434	1.67364	0	0.93		YDR240C	SNU56	1479	0	0.185		0.745	inviable	Component of U1 snRNP required for mRNA splicing via spliceosome; yeast specific, no metazoan counterpart; interacts with mRNA in commitment complex	.
	1-to-1	Anc_2.359	CAGL0L07260g		564	0	0	0.93		YDL098C	SNU23	585	0	0.43		0.5	inviable	Component of the U4/U6.U5 snRNP complex; involved in mRNA splicing via spliceosome	.
	1-to-1	Anc_5.011	CAGL0M13871g	PSE1	3276	0	0	0.935		YMR308C	PSE1	3270	0	0.25		0.685	inviable	Karyopherin/importin that interacts with the nuclear pore complex; acts as the nuclear import receptor for specific proteins, including Pdr1p, Yap1p, Ste12p, and Aft1p	.
	1-to-1	Anc_1.019	CAGL0H01573g		1080	0	0	0.94		YDR532C	KRE28	1158	0	0.185		0.755	inviable	Subunit of a kinetochore-microtubule binding complex; complex bridges centromeric heterochromatin and kinetochore MAPs and motors; required for sister chromatid bi-orientation and kinetochore binding of SAC components; complex also includes Spc105p	.
	1-to-1	Anc_6.114	CAGL0F06963g		639	0	0	0.95		YGL061C	DUO1	744	0	0.255		0.695	inviable	Essential subunit of the Dam1 complex (aka DASH complex); cooperates with Dam1p to connect the DASH complex with microtubules (MT); couples kinetochores to the force produced by MT depolymerization thereby aiding in chromosome segregation; is transferred to the kinetochore prior to mitosis	.
	1-to-1	Anc_5.068	CAGL0I02376g		552	0	0	0.95		YGR251W	NOP19	591	0	0.415		0.535	inviable	Ribosome biogenesis factor; nucleolar protein associated with pre-rRNA components of the 90S preribosome, required for cleavage of pre-rRNA at A0, A1 and A2 sites; interacts with RNA helicase Dhr2p and RNA helicase-like protein Utp25p; required for incorporation of Utp25p into preribosomes	.
	1-to-1	Anc_2.449	CAGL0K11660g		564	0.797872	0	0.955		YKL122C	SRP21	504	0	0.375		0.58	inviable	Subunit of the signal recognition particle (SRP); SRP functions in protein targeting to the endoplasmic reticulum membrane; not found in mammalian SRP; forms a pre-SRP structure in the nucleolus that is translocated to the cytoplasm	.
	1-to-1	Anc_3.112	CAGL0F05225g		429	0	0	0.98		YBR152W	SPP381	876	0	0.325		0.655	inviable	mRNA splicing factor, component of U4/U6.U5 tri-snRNP; interacts genetically and physically with Prp38p; relocalizes to the cytosol in response to hypoxia	.
	1-to-1	Anc_5.346	CAGL0H07183g		1497	0	0	0.982857		YHR070W	TRM5	1500	0	0.14		0.842857	inviable	tRNA(m(1)G37)methyltransferase; methylates a tRNA base adjacent to the anticodon that has a role in prevention of frameshifting; highly conserved across Archaea, Bacteria, and Eukarya	.
	1-to-1	Anc_8.118	CAGL0K02497g	TIF6	738	0	0	0.998036		YPR016C	TIF6	738	0	0.42		0.578036	inviable	Constituent of 66S pre-ribosomal particles; has similarity to human translation initiation factor 6 (eIF6); may be involved in the biogenesis and or stability of 60S ribosomal subunits	.
	1-to-1	Anc_8.375	CAGL0E00671g		642	0	0	1		YDR177W	UBC1	648	0	0.205		0.795	inviable	Ubiquitin-conjugating enzyme; mediates selective degradation of short-lived and abnormal proteins; plays a role in vesicle biogenesis and ER-associated protein degradation (ERAD); component of the cellular stress response; protein abundance increases in response to DNA replication stress	.
	1-to-1	Anc_1.071	CAGL0M11858g		714	0	0	1		YER018C	SPC25	666	0	0.24		0.76	inviable	Component of the kinetochore-associated Ndc80 complex; involved in chromosome segregation, spindle checkpoint activity, and kinetochore clustering; evolutionarily conserved; other members include Ndc80p, Nuf2p, Spc24p, and Spc25p	.
	1-to-1	Anc_8.562	CAGL0H05577g		6717	1.16123	0	0.995		YPL085W	SEC16	6588	0	0.5		0.495	inviable	COPII vesicle coat protein required for ER transport vesicle budding; essential factor in endoplasmic reticulum exit site (ERES) formation, as well as in COPII-mediated ER-to-Golgi traffic; bound to periphery of ER membranes and may act to stabilize initial COPII complexes; interacts with Sec23p, Sec24p and Sec31p	.
	1-to-1	Anc_2.364	CAGL0L07150g		423	0	0	1		YDL092W	SRP14	441	0	0.575		0.425	inviable	Signal recognition particle (SRP) subunit; interacts with the RNA component of SRP to form the Alu domain, which is the region of SRP responsible for arrest of nascent chain elongation during membrane targeting; homolog of mammalian SRP14	.
	1-to-1	Anc_3.458	CAGL0L04752g		924	0	0	1		YGR113W	DAM1	1032	0	0.66		0.34	inviable	Essential subunit of the Dam1 complex (aka DASH complex); cooperates with Duo1p to connect the DASH complex with the microtubules (MT); couples kinetochores to the force produced by MT depolymerization thereby aiding in chromosome segregation; Ipl1p target for regulating kinetochore-MT attachments	.
	1-to-1	Anc_8.095	CAGL0F02255g		441	0	0	1		YFR003C	YPI1	468	0	0.735		0.265	inviable	Regulatory subunit of the type I protein phosphatase (PP1) Glc7p; Glc7p participates in the regulation of a variety of metabolic processes including mitosis and glycogen metabolism; in vitro evidence suggests Ypi1p is an inhibitor of Glc7p while in vivo evidence suggests it is an activator; overproduction causes decreased cellular content of glycogen; partial depletion causes lithium sensitivity,…	.
	1-to-1	Anc_6.164	CAGL0J05368g		669	0.298954	0	1		YGL098W	USE1	738	0	0.75		0.25	inviable	Essential SNARE protein localized to the ER; involved in retrograde traffic from the Golgi to the ER; forms a complex with the SNAREs Sec22p, Sec20p and Ufe1p	.
	1-to-1	Anc_7.171	CAGL0L09471g		1233	0	0	1		YIR008C	PRI1	1230	0	0.762101		0.237899	inviable	Subunit of DNA primase; DNA primase is required for DNA synthesis and double-strand break repair	.
	1-to-1	Anc_5.072	CAGL0I02288g		1920	0.625	0	1		YHR166C	CDC23	1881	0	0.765		0.235	inviable	Subunit of the Anaphase-Promoting Complex/Cyclosome (APC/C); APC/C is a ubiquitin-protein ligase required for degradation of anaphase inhibitors, including mitotic cyclins, during the metaphase/anaphase transition	.
	1-to-1	Anc_1.097	CAGL0J07986g		489	0	0	1		YNL260C	LTO1	597	0	0.78		0.22	inviable	Essential protein that forms a complex with Rli1p and Yae1p; ortholog of human ORAOV1, which is overexpressed in solid tumors; inviability of null mutant under standard conditions is complemented by overexpression of ORAOV1; essential for growth under standard (aerobic) conditions but not under anaerobic conditions; may have a role in protection of ribosomal assembly and function from damage due …	.
	1-to-1	Anc_8.289	CAGL0M11506g		1047	0	0	1		YLR100W	ERG27	1044	0	0.79		0.21	inviable	3-keto sterol reductase; catalyzes the last of three steps required to remove two C-4 methyl groups from an intermediate in ergosterol biosynthesis; mutants are sterol auxotrophs	.
	1-to-1	Anc_5.643	CAGL0L10021g		1515	0	0	1		YOR046C	DBP5	1449	0	0.792237		0.207763	inviable	Cytoplasmic ATP-dependent RNA helicase of the DEAD-box family; involved in mRNA export from the nucleus, remodeling messenger ribonucleoprotein particles (mRNPs), with ATPase activity stimulated by Gle1p, IP6 and Nup159p; involved in translation termination along with Sup45p (eRF1); role in the cellular response to heat stress	.
	1-to-1	Anc_8.572	CAGL0H05731g		774	0.258398	0	1		YPL094C	SEC62	825	0	0.792237		0.207763	inviable	Essential subunit of Sec63 complex; with Sec61 complex, Kar2p/BiP and Lhs1p forms a channel competent for SRP-dependent and post-translational SRP-independent protein targeting and import into the ER; other members are Sec63p, Sec62p, Sec66p and Sec72p	.
	1-to-1	Anc_1.142	CAGL0K00605g		1572	2.4173	0	1		YJL194W	CDC6	1542	0	0.8		0.2	inviable	Essential ATP-binding protein required for DNA replication; component of the pre-replicative complex (pre-RC) which requires ORC to associate with chromatin and is in turn required for Mcm2-7p DNA association; homologous to S. pombe Cdc18p; relocalizes from nucleus to cytoplasm upon DNA replication stress	.
	1-to-1	Anc_2.149	CAGL0L12958g		1314	0.0761035	0	1		YHR118C	ORC6	1308	0	0.805		0.195	inviable	Subunit of the origin recognition complex (ORC); ORC directs DNA replication by binding to replication origins and is also involved in transcriptional silencing; phosphorylated by Cdc28p	.
	1-to-1	Anc_8.386	CAGL0G08173g		459	13.9434	0	1		YLR167W	RPS31	459	0	0.82		0.18	inviable	Fusion protein cleaved to yield ribosomal protein S31 and ubiquitin; ubiquitin may facilitate assembly of the ribosomal protein into ribosomes; interacts genetically with translation factor eIF2B; homologous to mammalian ribosomal protein S27A, no bacterial homolog	.
	1-to-1	Anc_2.370	CAGL0L07040g		747	0	0	1		YDL087C	LUC7	786	0	0.83		0.17	inviable	Essential protein associated with the U1 snRNP complex; splicing factor involved in recognition of 5' splice site; contains two zinc finger motifs; N-terminal zinc finger binds pre-mRNA; relocalizes to the cytosol in response to hypoxia	.
	1-to-1	Anc_2.380	CAGL0L06952g	TIF34	1044	0	0	1		YMR146C	TIF34	1044	0	0.83		0.17	inviable	eIF3i subunit of the eukaryotic translation initiation factor 3 (eIF3); subunit of the core complex of eIF3; essential for translation; stimulates rate of ribosomal scanning during translation reinitiation	.
	1-to-1	Anc_8.040	CAGL0K12496g		1083	0	0	1		YFL029C	CAK1	1107	0	0.84		0.16	inviable	Cyclin-dependent kinase-activating kinase; required for passage through the cell cycle; phosphorylates and activates Cdc28p; nucleotide-binding pocket differs significantly from those of most other protein kinases	.
	1-to-1	Anc_5.676	CAGL0G02233g		384	0	0	1		YKR083C	DAD2	402	0	0.84		0.16	inviable	Essential subunit of the Dam1 complex (aka DASH complex); complex couples kinetochores to the force produced by MT depolymerization thereby aiding in chromosome segregation; is transferred to the kinetochore prior to mitosis	.
	1-to-1	Anc_5.484	CAGL0K09504g		510	0	0	1		YOR148C	SPP2	558	0	0.85		0.15	inviable	Essential protein that promotes the first step of splicing; required for the final stages of spliceosome maturation; interacts with Prp2p, which may release Spp2p from the spliceosome following the first cleavage reaction	.
	1-to-1	Anc_7.310	CAGL0J08998g		3846	0	0	1		YDL195W	SEC31	3822	0	0.855		0.145	inviable	Component of the Sec13p-Sec31p complex of the COPII vesicle coat; COPII coat is required for vesicle formation in ER to Golgi transport; mutant has increased aneuploidy tolerance	.
	1-to-1	Anc_6.143	CAGL0K07095g		1116	0.179211	0	1		YBR234C	ARC40	1155	0	0.86		0.14	inviable	Subunit of the ARP2/3 complex; ARP2/3 is required for the motility and integrity of cortical actin patches	.
	1-to-1	Anc_6.135	CAGL0F07337g		1866	0	0	1		YGL116W	CDC20	1833	0	0.86		0.14	inviable	Activator of anaphase-promoting complex/cyclosome (APC/C); APC/C is required for metaphase/anaphase transition; directs ubiquitination of mitotic cyclins, Pds1p, and other anaphase inhibitors; cell-cycle regulated; potential Cdc28p substrate; relative distribution to the nucleus increases upon DNA replication stress	.
	1-to-1	Anc_3.006	CAGL0B01397g	NOP8	1545	0.161812	0	1		YOL144W	NOP8	1455	0	0.86		0.14	inviable	Nucleolar protein required for 60S ribosomal subunit biogenesis	.
	1-to-1	Anc_7.489	CAGL0C04851g		663	0	0	1		YJR112W	NNF1	606	0	0.865		0.135	inviable	Essential component of the MIND kinetochore complex; joins kinetochore subunits contacting DNA to those contacting microtubules; required for accurate chromosome segregation; complex consists of Mtw1p Including Nnf1p-Nsl1p-Dsn1p (MIND)	.
	1-to-1	Anc_2.027	CAGL0K04961g	YPD1	486	0	0	1		YDL235C	YPD1	504	0	0.865		0.135	inviable	Phosphorelay intermediate protein; phosphorylated by the plasma membrane sensor Sln1p in response to osmotic stress and then in turn phosphorylates the response regulators Ssk1p in the cytosol and Skn7p in the nucleus	.
	1-to-1	Anc_3.025	CAGL0M04081g		1368	0	0	1		YNL317W	PFS2	1398	0	0.875		0.125	inviable	Integral subunit of the pre-mRNA CPF complex; the cleavage and polyadenylation factor (CPF) complex plays an essential role in mRNA 3'-end formation by bridging different processing factors and thereby promoting the assembly of the processing complex	.
	1-to-1	Anc_5.250	CAGL0J00869g		651	19.7389	0	1		YKL144C	RPC25	639	0	0.875		0.125	inviable	RNA polymerase III subunit C25; required for transcription initiation; forms a heterodimer with Rpc17p; paralog of Rpb7p	.
	1-to-1	Anc_1.253	CAGL0G04411g		5313	0.395257	0	1		YJL109C	UTP10	5310	0	0.88		0.12	inviable	Nucleolar protein; component of the small subunit (SSU) processome containing the U3 snoRNA that is involved in processing of pre-18S rRNA; mutant has increased aneuploidy tolerance	.
	1-to-1	Anc_2.409	CAGL0K03795g		3888	0.591564	0	1		YMR128W	ECM16	3804	0	0.885		0.115	inviable	Essential DEAH-box ATP-dependent RNA helicase specific to U3 snoRNP; predominantly nucleolar in distribution; required for 18S rRNA synthesis	.
	1-to-1	Anc_6.294	CAGL0L10670g		792	0	0	1		YMR200W	ROT1	771	0	0.89		0.11	inviable	Molecular chaperone involved in protein folding in the ER; mutation causes defects in cell wall synthesis and in lysis of autophagic bodies, suppresses tor2 mutations, and is synthetically lethal with kar2-1 and with rot2 mutations; involved in N-linked glycosylation and O-mannosylation	.
	1-to-1	Anc_8.639	CAGL0M02695g		894	0	0	1		YPL131W	RPL5	894	0	0.89		0.11	inviable	Ribosomal 60S subunit protein L5; homologous to mammalian ribosomal protein L5 and bacterial L18; binds 5S rRNA and is required for 60S subunit assembly	.
	1-to-1	Anc_7.532	CAGL0G09801g		2160	0	0	1		YPR175W	DPB2	2070	0	0.895		0.105	inviable	Second largest subunit of DNA polymerase II (DNA polymerase epsilon); required for maintenance of fidelity of chromosomal replication; essential motif in C-terminus is required for formation of the four-subunit Pol epsilon; expression peaks at the G1/S phase boundary; Cdc28p substrate	.
	1-to-1	Anc_8.054	CAGL0F01925g		657	6.84932	0	1		YLR051C	FCF2	654	0	0.9		0.1	inviable	Nucleolar protein involved in the early steps of 35S rRNA processing; interacts with Faf1p; member of a transcriptionally co-regulated set of genes called the RRB regulon; essential gene	.
	1-to-1	Anc_8.878	CAGL0H06897g		492	0	0	1		YML098W	TAF13	504	0	0.9		0.1	inviable	TFIID subunit (19 kDa); involved in RNA polymerase II transcription initiation, similar to histone H4 with atypical histone fold motif of Spt3-like transcription factors	.
	1-to-1	Anc_8.603	CAGL0J07106g		750	0	0	1		YOR194C	TOA1	861	0	0.9		0.1	inviable	TFIIA large subunit; involved in transcriptional activation, acts as antirepressor or as coactivator; homologous to largest and second largest subunits of human and Drosophila TFIIA	.
	1-to-1	Anc_8.476	CAGL0K11253g		903	0	0	1		YDR246W	TRS23	660	0	0.9		0.1	inviable	One of 10 subunits of the transport protein particle (TRAPP) complex; the TRAPP complex is of the cis-Golgi and mediates vesicle docking and fusion; involved in endoplasmic reticulum (ER) to Golgi membrane traffic; human homolog is TRAPPC4	.
	1-to-1	Anc_8.027	CAGL0K12650g	TUB2	1359	0	0	1		YFL037W	TUB2	1374	0	0.9		0.1	inviable	Beta-tubulin; associates with alpha-tubulin (Tub1p and Tub3p) to form tubulin dimer, which polymerizes to form microtubules; mutation in human ortholog is associated with congenital fibrosis of the extraocular muscles (CFEOM) with polymicrogyria	.
	1-to-1	Anc_7.051	CAGL0E05500g		4932	0	0	1		YOR341W	RPA190	4995	0	0.905		0.095	inviable	RNA polymerase I largest subunit A190	.
	1-to-1	Anc_1.399	CAGL0H03729g		912	4.22149	0	1		YNL006W	LST8	912	0	0.906244		0.0937558	inviable	Protein required for the transport of Gap1p; required for the transport of amino acid permease Gap1p from the Golgi to the cell surface; component of the TOR signaling pathway; associates with both Tor1p and Tor2p; contains a WD-repeat	.
	1-to-1	Anc_7.383	CAGL0I04906g		618	0	0	1		YER094C	PUP3	618	0	0.906244		0.0937558	inviable	Beta 3 subunit of the 20S proteasome; involved in ubiquitin-dependent catabolism; human homolog is subunit C10	.
	1-to-1	Anc_2.657	CAGL0L09757g		981	0	0	1		YKL018W	SWD2	990	0	0.906244		0.0937558	inviable	Subunit of the COMPASS (Set1C) complex; COMPASS methylates histone H3 on lys 4 and is involved in telomeric silencing; subunit of CPF (cleavage and polyadenylation factor), a complex involved in RNAP II transcription termination	.
	1-to-1	Anc_1.401	CAGL0H03773g		954	0	0	1		YNL002C	RLP7	969	0	0.91		0.09	inviable	Nucleolar protein similar to large ribosomal subunit L7 proteins; constituent of 66S pre-ribosomal particles; plays an essential role in processing of precursors to the large ribosomal subunit RNAs	.
	1-to-1	Anc_5.302	CAGL0H01265g		1818	0	0	1		YDR292C	SRP101	1866	0	0.91		0.09	inviable	Signal recognition particle (SRP) receptor alpha subunit; contain GTPase domains; involved in SRP-dependent protein targeting; interacts with the beta subunit, Srp102p	.
	1-to-1	Anc_1.257	CAGL0G04521g		441	0	0	1		YJL104W	PAM16	450	0	0.915		0.085	inviable	Subunit of the import motor (PAM complex); the PAM complex is a component of the Translocase of the Inner Mitochondrial membrane (TIM23 complex); forms a 1:1 subcomplex with Pam18p and inhibits its cochaperone activity; contains a J-like domain	.
	1-to-1	Anc_1.043	CAGL0B00880g		918	0	0	1		YCL031C	RRP7	894	0	0.915		0.085	inviable	Essential protein involved in rRNA processing and ribosome biogenesis; protein abundance increases in response to DNA replication stress	.
	1-to-1	Anc_3.474	CAGL0D04884g		1692	0	0	1		YPR137W	RRP9	1722	0	0.915		0.085	inviable	Protein involved in pre-rRNA processing; associated with U3 snRNP; component of small ribosomal subunit (SSU) processosome; ortholog of the human U3-55k protein	.
	1-to-1	Anc_2.334	CAGL0F07843g		1839	0	0	1		YGL142C	GPI10	1851	0	0.92		0.08	inviable	Integral membrane protein involved in GPI anchor synthesis; putative alpha 1,2 mannosyltransferase required for addition of the third mannose onto the glycosylphosphatidylinositol (GPI) core structure; human PIG-Bp is a functional homolog	.
	1-to-1	Anc_5.353	CAGL0J10802g		174	0	0	1		YHR072W-A	NOP10	177	0	0.92		0.08	inviable	Subunit of box H/ACA snoRNP complex; required for pseudouridylation and processing of pre-18S rRNA	.
	1-to-1	Anc_3.146	CAGL0K01397g	FMNAT	915	1.20219	0	1		YDL045C	FAD1	921	0	0.921208		0.0787916	inviable	Flavin adenine dinucleotide (FAD) synthetase; performs the second step in synthesis of FAD from riboflavin	.
	1-to-1	Anc_8.261	CAGL0L12232g		1776	0	0	1		YLR088W	GAA1	1845	0	0.921208		0.0787916	inviable	Subunit of the GPI:protein transamidase complex; removes the GPI-anchoring signal and attaches GPI (glycosylphosphatidylinositol) to proteins in the ER	.
	1-to-1	Anc_8.397	CAGL0G08294g		816	0	0	1		YLR243W	GPN3	819	0	0.921208		0.0787916	inviable	Putative GTPase with a role in biogenesis of RNA pol II and polIII; may be involved in assembly of RNA polymerases II and III and in their transport into the nucleus; may have a role in sister chromatid cohesion; contains a Gly-Pro-Asn motif in the G domain; similar to Npa3p and Gpn2p	.
	1-to-1	Anc_8.610	CAGL0J06952g		828	0	0	1		YPL117C	IDI1	867	0	0.921208		0.0787916	inviable	Isopentenyl diphosphate:dimethylallyl diphosphate isomerase; catalyzes an essential activation step in the isoprenoid biosynthetic pathway; required for viability; isopentenyl diphosphate:dimethylallyl diphosphate isomerase is also known as IPP isomerase	.
	1-to-1	Anc_1.346	CAGL0I09152g		858	1.98135	0	1		YBR257W	POP4	840	0	0.921208		0.0787916	inviable	Subunit of both RNase MRP and nuclear RNase P; RNase MRP cleaves pre-rRNA, while nuclear RNase P cleaves tRNA precursors to generate mature 5' ends and facilitates turnover of nuclear RNAs; binds to the RPR1 RNA subunit in RNase P	.
	1-to-1	Anc_8.220	CAGL0M11104g		219	0	0	1		YDR086C	SSS1	243	0	0.921208		0.0787916	inviable	Subunit of the Sec61p translocation complex (Sec61p-Sss1p-Sbh1p); this complex forms a channel for passage of secretory proteins through the endoplasmic reticulum membrane, and of the Ssh1p complex (Ssh1p-Sbh2p-Sss1p); interacts with Ost4p and Wbp1p	.
	1-to-1	Anc_8.370	CAGL0E00781g		2067	0	0	1		YDR172W	SUP35	2058	0	0.921208		0.0787916	inviable	Translation termination factor eRF3; has a role in mRNA deadenylation and decay; altered protein conformation creates the [PSI(+)] prion that alters translational fidelity and results in a nonsense suppressor phenotype	.
	1-to-1	Anc_2.580	CAGL0I05434g		363	1.37741	0	1		YKL058W	TOA2	369	0	0.921208		0.0787916	inviable	TFIIA small subunit; involved in transcriptional activation, acts as antirepressor or as coactivator; homologous to smallest subunit of human and Drosophila TFIIA; protein abundance increases in response to DNA replication stress	.
	1-to-1	Anc_4.249	CAGL0D00814g		474	0	0	1		YDL064W	UBC9	584	0	0.921208		0.0787916	inviable	SUMO-conjugating enzyme involved in the Smt3p conjugation pathway; nuclear protein required for S- and M-phase cyclin degradation and mitotic control; involved in proteolysis mediated by the anaphase-promoting complex cyclosome (APCC)	.
	1-to-1	Anc_1.115	CAGL0J07744g		2367	0	0	1		YNL247W		2304	0	0.921208		0.0787916	inviable	Cysteinyl-tRNA synthetase; may interact with ribosomes, based on co-purification experiments	.
	1-to-1	Anc_4.022	CAGL0D02816g		1893	0	0	1		YLL035W	GRC3	1899	0	0.925		0.075	inviable	Polynucleotide kinase present on rDNA; required for efficient transcription termination by RNA polymerase I; functions with Las1p in a conserved mechanism to modulate rRNA processing and ribosome biogenesis; required for cell growth; mRNA is cell-cycle regulated	.
	1-to-1	Anc_1.300	CAGL0H02849g		648	0	0	1		YJL072C	PSF2	642	0	0.925		0.075	inviable	Subunit of the GINS complex (Sld5p, Psf1p, Psf2p, Psf3p); complex is localized to DNA replication origins and implicated in assembly of the DNA replication machinery	.
	1-to-1	Anc_8.294	CAGL0M11594g		1107	0	0	1		YLR105C	SEN2	1134	0	0.925		0.075	inviable	Subunit of the tRNA splicing endonuclease; tRNA splicing endonuclease is composed of Sen2p, Sen15p, Sen34p, and Sen54p; Sen2p contains the active site for tRNA 5' splice site cleavage and has similarity to Sen34p and to Archaeal tRNA splicing endonuclease	.
	1-to-1	Anc_5.418	CAGL0A02673g		831	0	0	1		YDR361C	BCP1	852	0	0.93		0.07	inviable	Essential protein involved in nuclear export of Mss4p; Mss4p is a lipid kinase that generates phosphatidylinositol 4,5-biphosphate and plays a role in actin cytoskeleton organization and vesicular transport	.
	1-to-1	Anc_5.654	CAGL0G01947g		1017	0	0	1		YKR071C	DRE2	1047	0	0.93		0.07	inviable	Component of the cytosolic Fe-S protein assembly (CIA) machinery; contains an Fe-S cluster that receives electrons from NADPH via the action of Tah18pin an early step in the CIA pathway; ortholog of human Ciapin1; protein abundance increases in response to DNA replication stress	.
	1-to-1	Anc_8.857	CAGL0M07095g	ERG9	1332	0	0	1		YHR190W	ERG9	1335	0	0.93		0.07	inviable	Farnesyl-diphosphate farnesyl transferase (squalene synthase); joins two farnesyl pyrophosphate moieties to form squalene in the sterol biosynthesis pathway	.
	1-to-1	Anc_8.699	CAGL0F03531g		1773	0.564016	0	1		YPL169C	MEX67	1800	0	0.93		0.07	inviable	Poly(A)RNA binding protein involved in nuclear mRNA export; component of the nuclear pore; ortholog of human TAP	.
	1-to-1	Anc_7.533	CAGL0G09823g		963	0	0	1		YPR176C	BET2	978	0	0.935		0.065	inviable	Beta subunit of Type II geranylgeranyltransferase; required for vesicular transport between the endoplasmic reticulum and the Golgi; provides a membrane attachment moiety to Rab-like proteins Ypt1p and Sec4p	.
	1-to-1	Anc_7.428	CAGL0M09559g		2307	0	0	1		YBL097W	BRN1	2265	0	0.935		0.065	inviable	Subunit of the condensin complex; required for chromosome condensation and for clustering of tRNA genes at the nucleolus; may influence multiple aspects of chromosome transmission	.
	1-to-1	Anc_1.513	CAGL0F00539g		1698	0.353357	0	1		YJR064W	CCT5	1689	0	0.935		0.065	inviable	Subunit of the cytosolic chaperonin Cct ring complex; related to Tcp1p, required for the assembly of actin and tubulins in vivo	.
	1-to-1	Anc_3.569	CAGL0C01947g		2118	0	0	1		YGL245W	GUS1	2127	0	0.935		0.065	inviable	Glutamyl-tRNA synthetase (GluRS); forms a complex with methionyl-tRNA synthetase (Mes1p) and Arc1p; complex formation increases the catalytic efficiency of both tRNA synthetases and ensures their correct localization to the cytoplasm; protein abundance increases in response to DNA replication stress	.
	1-to-1	Anc_7.231	CAGL0L00781g	MET30	2022	0.593472	0	1		YIL046W	MET30	1923	0	0.935		0.065	inviable	F-box protein containing five copies of the WD40 motif; controls cell cycle function, sulfur metabolism, and methionine biosynthesis as part of the ubiquitin ligase complex; interacts with and regulates Met4p, localizes within the nucleus; dissociation of Met30p from SCF complex in response to cadmium stress is regulated by Cdc48p	.
	1-to-1	Anc_3.417	CAGL0G01804g		861	0	0	1		YPR103W	PRE2	864	0	0.935		0.065	inviable	Beta 5 subunit of the 20S proteasome; responsible for the chymotryptic activity of the proteasome	.
	1-to-1	Anc_5.120	CAGL0K00759g	ZPR1	1461	0	0	1		YGR211W	ZPR1	1461	0	0.935		0.065	inviable	Essential protein with two zinc fingers; present in the nucleus of growing cells but relocates to the cytoplasm in starved cells via a process mediated by Cpr1p; binds to translation elongation factor eEF-1 (Tef1p); relative distribution to the nucleus increases upon DNA replication stress	.
	1-to-1	Anc_7.173	CAGL0L09581g		435	0	0	1		YBR252W	DUT1	444	0	0.94		0.06	inviable	deoxyuridine triphosphate diphosphatase (dUTPase); catalyzes hydrolysis of dUTP to dUMP and PPi, thereby preventing incorporation of uracil into DNA during replication; critical for the maintenance of genetic stability; also has diphosphatase activity on deoxyinosine triphosphate	.
	1-to-1	Anc_3.094	CAGL0G04587g		930	1.1828	0	1		YDR489W	SLD5	885	0	0.94		0.06	inviable	Subunit of the GINS complex (Sld5p, Psf1p, Psf2p, Psf3p); complex is localized to DNA replication origins and implicated in assembly of the DNA replication machinery	.
	1-to-1	Anc_7.323	CAGL0J08888g		1398	0	0	1		YLR212C	TUB4	1422	0	0.94		0.06	inviable	Gamma-tubulin; involved in nucleating microtubules from both the cytoplasmic and nuclear faces of the spindle pole body; protein abundance increases in response to DNA replication stress	.
	1-to-1	Anc_8.705	CAGL0K08954g		477	0	0	1		YOR257W	CDC31	486	0	0.943106		0.0568942	inviable	Calcium-binding component of the spindle pole body (SPB) half-bridge; required for SPB duplication in mitosis and meiosis II; homolog of mammalian centrin; binds multiubiquitinated proteins and is involved in proteasomal protein degradation	.
	1-to-1	Anc_3.360	CAGL0D01452g		444	0.112613	0	1		YBR109C	CMD1	444	0	0.943106		0.0568942	inviable	Calmodulin; Ca++ binding protein that regulates Ca++ independent processes (mitosis, bud growth, actin organization, endocytosis, etc.) and Ca++ dependent processes (stress-activated pathways), targets include Nuf1p, Myo2p and calcineurin	.
	1-to-1	Anc_2.629	CAGL0F06523g		2283	0	0	1		YKL078W	DHR2	2208	0	0.943106		0.0568942	inviable	Predominantly nucleolar DEAH-box ATP-dependent RNA helicase; required for 18S rRNA synthesis	.
	1-to-1	Anc_1.517	CAGL0F00451g		1059	1.69972	0	1		YJR068W	RFC2	1062	0	0.943106		0.0568942	inviable	Subunit of heteropentameric Replication factor C (RF-C); RF-C is a DNA binding protein and ATPase that acts as a clamp loader of the proliferating cell nuclear antigen (PCNA) processivity factor for DNA polymerases delta and epsilon	.
	1-to-1	Anc_7.520	CAGL0I08459g	RHO1	633	0	0	1		YPR165W	RHO1	630	0	0.943106		0.0568942	inviable	GTP-binding protein of the rho subfamily of Ras-like proteins; involved in establishment of cell polarity; regulates protein kinase C (Pkc1p) and the cell wall synthesizing enzyme 1,3-beta-glucan synthase (Fks1p and Gsc2p)	.
	1-to-1	Anc_8.627	CAGL0L02799g		213	0	0	1		YOR210W	RPB10	213	0	0.943106		0.0568942	inviable	RNA polymerase subunit ABC10-beta; common to RNA polymerases I, II, and III	.
	1-to-1	Anc_3.283	CAGL0H08415g		333	0	0	1		YDR045C	RPC11	333	0	0.943106		0.0568942	inviable	RNA polymerase III subunit C11; mediates pol III RNA cleavage activity and is important for termination of transcription; homologous to TFIIS	.
	1-to-1	Anc_7.544	CAGL0G10043g		729	0	0	1		YPR187W	RPO26	544	0	0.943106		0.0568942	inviable	RNA polymerase subunit ABC23; common to RNA polymerases I, II, and III; part of central core; similar to bacterial omega subunit	.
	1-to-1	Anc_6.235	CAGL0E05896g		855	0	0	1		YPL218W	SAR1	712	0	0.943106		0.0568942	inviable	GTPase, GTP-binding protein of the ARF family; component of COPII coat of vesicles; required for transport vesicle formation during ER to Golgi protein transport; lowers membrane rigidity helping in vesicle formation	.
	1-to-1	Anc_8.409	CAGL0F05467g		465	0	0	1		YDR201W	SPC19	498	0	0.943106		0.0568942	inviable	Essential subunit of the Dam1 complex (aka DASH complex); complex couples kinetochores to the force produced by MT depolymerization thereby aiding in chromosome segregation; also localized to nuclear side of spindle pole body	.
	1-to-1	Anc_2.144	CAGL0L04136g		2490	0.763052	0	1		YNL126W	SPC98	2541	0	0.943106		0.0568942	inviable	Component of the microtubule-nucleating Tub4p (gamma-tubulin) complex; interacts with Spc110p at the spindle pole body (SPB) inner plaque and with Spc72p at the SPB outer plaque	.
	1-to-1	Anc_8.197	CAGL0I06688g		702	0	0	1		YER148W	SPT15	723	0	0.943106		0.0568942	inviable	TATA-binding protein; general transcription factor that interacts with other factors to form the preinitiation complex at promoters, essential for viability	.
	1-to-1	Anc_2.019	CAGL0K05071g		615	0	0	1		YNL222W	SSU72	621	0	0.943106		0.0568942	inviable	Phosphatase and transcription/RNA-processing factor; associates with TFIIB and cleavage/polyadenylation factor Pta1p; exhibits phosphatase activity on serine-5 and serine-7 of the RNA polymerase II C-terminal domain; affects start site selection and transcriptional read through in vivo	.
	1-to-1	Anc_1.280	CAGL0M03091g		2493	0.320899	0	1		YJL087C	TRL1	2484	0	0.943106		0.0568942	inviable	tRNA ligase; required for tRNA splicing and for both splicing and translation of HAC1 mRNA in the UPR; has phosphodiesterase, polynucleotide kinase, and ligase activities; localized at the inner nuclear envelope and partially to polysomes	.
	1-to-1	Anc_5.601	CAGL0K06589g		666	0.15015	0	1		YDR472W	TRS31	852	0	0.943106		0.0568942	inviable	One of 10 subunits of the transport protein particle (TRAPP) complex; the TRAPP complex is of the cis-Golgi and mediates vesicle docking and fusion; involved in endoplasmic reticulum (ER) to Golgi membrane traffic	.
	1-to-1	Anc_4.244	CAGL0D00880g		2421	0	0	1		YDL060W	TSR1	2367	0	0.943106		0.0568942	inviable	Protein required for processing of 20S pre-rRNA in the cytoplasm; associates with pre-40S ribosomal particles; inhibits the premature association of 60S subunits with assembling 40S subunits in the cytoplasm; similar to Bms1p; relocalizes from nucleus to cytoplasm upon DNA replication stress	.
	1-to-1	Anc_2.541	CAGL0L01991g		3162	1.13852	0	1		YKL033W	TTI1	3117	0	0.943106		0.0568942	inviable	Subunit of the ASTRA complex, involved in chromatin remodeling; telomere length regulator involved in the stability or biogenesis of PIKKs such as TORC1; similar to S. pombe Tti1p; detected in highly purified mitochondria in high-throughput studies	.
	1-to-1	Anc_3.204	CAGL0C04301g		588	0	0	1		YDR002W	YRB1	606	0	0.943106		0.0568942	inviable	Ran GTPase binding protein; involved in nuclear protein import and RNA export, ubiquitin-mediated protein degradation during the cell cycle; shuttles between the nucleus and cytoplasm; is essential; homolog of human RanBP1	.
	1-to-1	Anc_8.506	CAGL0H07425g		1143	0	0	1		YBR155W	CNS1	1158	0	0.945		0.055	inviable	TPR-containing co-chaperone; binds both Hsp82p (Hsp90) and Ssa1p (Hsp70) and stimulates the ATPase activity of SSA1, ts mutants reduce Hsp82p function while over expression suppresses the phenotypes of an HSP82 ts allele and a cpr7 deletion	.
	1-to-1	Anc_5.239	CAGL0D02948g	KAR2	2004	0	0	1		YJL034W	KAR2	2049	0	0.945		0.055	inviable	ATPase involved in protein import into the ER; also acts as a chaperone to mediate protein folding in the ER and may play a role in ER export of soluble proteins; regulates the unfolded protein response via interaction with Ire1p	.
	1-to-1	Anc_3.471	CAGL0L04862g		1812	0	0	1		YGR119C	NUP57	1626	0	0.945		0.055	inviable	FG-nucleoporin component of central core of the nuclear pore complex; contributes directly to nucleocytoplasmic transport and maintenance of the nuclear pore complex (NPC) permeability barrier; found in stable complex with Nic96p and two other FG-nucleoproteins (Nsp1p and Nup49p)	.
	1-to-1	Anc_5.160	CAGL0G06974g		462	0	0	1		YJL011C	RPC17	486	0	0.945		0.055	inviable	RNA polymerase III subunit C17; physically interacts with C31, C11, and TFIIIB70; may be involved in the recruitment of pol III by the preinitiation complex; protein abundance increases in response to DNA replication stress; relocalizes to the cytosol in response to hypoxia	.
	1-to-1	Anc_3.345	CAGL0D01650g		1008	0	0	1		YPR056W	TFB4	1017	0	0.945		0.055	inviable	Subunit of TFIIH complex; involved in transcription initiation, similar to 34 kDa subunit of human TFIIH; interacts with Ssl1p	.
	1-to-1	Anc_3.161	CAGL0K01595g		1507	0	0	1		YDL029W	ARP2	1299	0	0.95		0.05	inviable	Essential component of the Arp2/3 complex; Arp2/3 is a highly conserved actin nucleation center required for the motility and integrity of actin patches; involved in endocytosis and membrane growth and polarity	.
	1-to-1	Anc_6.222	CAGL0E05720g		1077	0.185701	0	1		YPL209C	IPL1	1104	0	0.95		0.05	inviable	Aurora kinase subunit of the conserved chromosomal passenger complex; other members are Sli15p, Bir1p, and Nbl1p; involved in regulating kinetochore-microtubule attachments; helps maintain condensed chromosomes during anaphase and early telophase; required for SPB cohesion and prevention of multipolar spindle formation; localizes to nuclear foci that become diffuse upon DNA replication stress; re…	.
	1-to-1	Anc_3.160	CAGL0K01573g		1551	0	0	1		YDL030W	PRP9	1593	0	0.95		0.05	inviable	Subunit of the SF3a splicing factor complex; required for spliceosome assembly; acts after the formation of the U1 snRNP-pre-mRNA complex	.
	1-to-1	Anc_2.627	CAGL0F06479g		1941	0	0	1		YMR061W	RNA14	2034	0	0.95		0.05	inviable	Component of the cleavage and polyadenylation factor I (CF I); CF 1, composed of the CF 1A complex (Rna14p, Rna15p, Clp1p, Pcf11p) and Hrp1, is involved in cleavage and polyadenylation of mRNA 3' ends; bridges interaction between Rna15p and Hrp1p in the CF I complex; mutant displays reduced transcription elongation in the G-less-based run-on (GLRO) assay; required for gene looping; relocalizes to…	.
	1-to-1	Anc_2.401	CAGL0K03861g		1542	0	0	1		YMR131C	RRB1	1536	0	0.95375		0.04625	inviable	Nuclear protein involved in early steps of ribosome biogenesis; physically interacts with the ribosomal protein Rpl3p; essential gene	.
	1-to-1	Anc_8.513	CAGL0H07535g		897	1.33779	0	1		YBR160W	CDC28	897	0	0.955		0.045	inviable	Cyclin-dependent kinase (CDK) catalytic subunit; master regulator of mitotic and meiotic cell cycles; alternately associates with G1 (CLNs), S and G2/M (CLBs) phase cyclins, which provide substrate specificity; regulates cell cycle transcriptional programs, basal transcription, chromosome duplication and segregation, spindle dynamics, lipid biosynthesis, membrane trafficking, polarized cell growt…	.
	1-to-1	Anc_6.071	CAGL0F04939g		2319	0.0862441	0	1		YLR274W	MCM5	2328	0	0.955		0.045	inviable	Component of the Mcm2-7 hexameric helicase complex; MCM complex is important for priming origins of DNA replication in G1 and becomes an active ATP-dependent helicase that promotes DNA melting and elongation when activated by Cdc7p-Dbf4p in S-phase	.
	1-to-1	Anc_7.317	CAGL0I03762g		1590	0	0	1		YDL143W	CCT4	1587	0	0.96		0.04	inviable	Subunit of the cytosolic chaperonin Cct ring complex; related to Tcp1p, required for the assembly of actin and tubulins in vivo	.
	1-to-1	Anc_1.248	CAGL0G04367g		1653	0	0	1		YJL111W	CCT7	1653	0	0.96		0.04	inviable	Subunit of the cytosolic chaperonin Cct ring complex; related to Tcp1p, required for the assembly of actin and tubulins in vivo; mutant has increased aneuploidy tolerance	.
	1-to-1	Anc_8.033	CAGL0F01705g	FRS1	1788	0	0	1		YLR060W	FRS1	1788	0	0.96		0.04	inviable	Beta subunit of cytoplasmic phenylalanyl-tRNA synthetase; forms a tetramer with Frs2p to generate active enzyme; able to hydrolyze mis-aminoacylated tRNA-Phe, which could contribute to translational quality control	.
	1-to-1	Anc_8.619	CAGL0L02849g		3402	0.0881834	0	1		YOR207C	RET1	3450	0	0.96		0.04	inviable	Second-largest subunit of RNA polymerase III; RNA polymerase II is responsible for the transcription of tRNA and 5S RNA genes, and other low molecular weight RNAs	.
	1-to-1	Anc_2.092	CAGL0J06094g		3327	0	0	1		YNL163C	RIA1	3333	0	0.96		0.04	inviable	Cytoplasmic GTPase/eEF2-like factor involved in ribosomal biogenesis; with Sdo1p, a guanine nucleotide exchange factor (GEF), promotes release of Tif6p from 60S ribosomal subunits in the cytoplasm so that they can assemble with 40S subunits to generate mature ribosomes; required for quality control check of newly made large ribosomal subunits before they are released into the pool of translating …	.
	1-to-1	Anc_8.227	CAGL0G08041g		1824	0	0	1		YDR091C	RLI1	1827	0	0.96		0.04	inviable	Essential iron-sulfur protein; required for ribosome biogenesis and translation initiation and termination; facilitates binding of a multifactor complex (MFC) of initiation factors to the small ribosomal subunit; predicted ABC family ATPase; forms a complex with Lto1p and Yae1p that may be involved in protection of the ribosome from damage due to reactive oxygen species	.
	1-to-1	Anc_5.385	CAGL0H02079g		885	0	0	1		YHR088W	RPF1	888	0	0.96		0.04	inviable	Protein involved in assembly and export of the large ribosomal subunit; nucleolar protein; constituent of 66S pre-ribosomal particles; contains a sigma(70)-like motif, which is thought to bind RNA	.
	1-to-1	Anc_5.381	CAGL0M01210g		1005	0	0	1		YHR085W	IPI1	1005	0	0.965		0.035	inviable	Component of the Rix1 complex and possibly pre-replicative complexes; required for processing of ITS2 sequences from 35S pre-rRNA; component of the pre-60S ribosomal particle with the dynein-related AAA-type ATPase Mdn1p; required for pre-replicative complex (pre-RC) formation and maintenance during DNA replication licensing; relocalizes to the cytosol in response to hypoxia; essential gene	.
	1-to-1	Anc_8.547	CAGL0H05445g	PGI1	1668	0	0	1		YBR196C	PGI1	1665	0	0.965		0.035	inviable	Glycolytic enzyme phosphoglucose isomerase; catalyzes the interconversion of glucose-6-phosphate and fructose-6-phosphate; required for cell cycle progression and completion of the gluconeogenic events of sporulation	.
	1-to-1	Anc_2.348	CAGL0L07370g		1419	0.493305	0	1		YDL103C	QRI1	1434	0	0.965		0.035	inviable	UDP-N-acetylglucosamine pyrophosphorylase; catalyzes the formation of UDP-N-acetylglucosamine (UDP-GlcNAc), which is important in cell wall biosynthesis, protein N-glycosylation, and GPI anchor biosynthesis; protein abundance increases in response to DNA replication stress	.
	1-to-1	Anc_8.711	CAGL0K08866g		990	0	0	1		YOR261C	RPN8	1017	0	0.965		0.035	inviable	Essential non-ATPase regulatory subunit of the 26S proteasome; has similarity to the human p40 proteasomal subunit and to another S. cerevisiae regulatory subunit, Rpn11p	.
	1-to-1	Anc_8.763	CAGL0G07535g		612	0	0	1		YOR294W	RRS1	612	0	0.965		0.035	inviable	Essential protein that binds ribosomal protein L11; required for nuclear export of the 60S pre-ribosomal subunit during ribosome biogenesis; localizes to the nucleolus and in foci along nuclear periphery; cooperates with Ebp2p and Mps3p to mediate telomere clustering by binding Sir4p, but is not involved in telomere tethering; mouse homolog shows altered expression in Huntington's disease model m…	.
	1-to-1	Anc_2.667	CAGL0L09867g		852	0	0	1		YKL024C	URA6	615	0	0.965		0.035	inviable	Uridylate kinase; catalyzes the seventh enzymatic step in the de novo biosynthesis of pyrimidines, converting uridine monophosphate (UMP) into uridine-5'-diphosphate (UDP)	.
	1-to-1	Anc_4.345	CAGL0H04345g		480	0	0	1		YML077W	BET5	480	0	0.97		0.03	inviable	Component of the TRAPP (transport protein particle) complex; TRAPP plays an essential role in the vesicular transport from endoplasmic reticulum to Golgi	.
	1-to-1	Anc_5.336	CAGL0J10934g		1836	0	0	1		YDR311W	TFB1	1929	0	0.97		0.03	inviable	Subunit of TFIIH and nucleotide excision repair factor 3 complexes; required for nucleotide excision repair, target for transcriptional activators; relocalizes to the cytosol in response to hypoxia	.
	1-to-1	Anc_1.093	CAGL0J08052g		930	0	0	1		YNL263C	YIF1	945	0	0.97		0.03	inviable	Integral membrane protein; required for the fusion of ER-derived COPII transport vesicles with the Golgi; interacts with Yip1p and Yos1p; localizes to the Golgi, the ER, and COPII vesicles; homolog of human YIPF3	.
	1-to-1	Anc_4.303	CAGL0D03498g		618	0	0	1		YKL196C	YKT6	603	0	0.97		0.03	inviable	Vesicle membrane protein (v-SNARE) with acyltransferase activity; involved in trafficking to and within the Golgi, endocytic trafficking to the vacuole, and vacuolar fusion; membrane localization due to prenylation at the carboxy-terminus	.
	1-to-1	Anc_4.259	CAGL0C02585g		2316	0	0	1		YLR397C	AFG2	2343	0	0.975		0.025	inviable	ATPase of the CDC48/PAS1/SEC18 (AAA) family, forms a hexameric complex; is essential for pre-60S maturation and release of several preribosome maturation factors; releases Rlp24p from purified pre-60S particles in vitro; may be involved in degradation of aberrant mRNAs	.
	1-to-1	Anc_3.299	CAGL0E04576g		2049	0	0	1		YDR052C	DBF4	2115	0	0.975		0.025	inviable	Regulatory subunit of Cdc7p-Dbf4p kinase complex; required for Cdc7p kinase activity and initiation of DNA replication; phosphorylates the Mcm2-7 family of proteins; cell cycle regulated; relative distribution to the nucleus increases upon DNA replication stress	.
	1-to-1	Anc_4.130	CAGL0F08547g	EFB1	1039	0	0	1		YAL003W	EFB1	987	0	0.975		0.025	inviable	Translation elongation factor 1 beta; stimulates nucleotide exchange to regenerate EF-1 alpha-GTP for the next elongation cycle; part of the EF-1 complex, which facilitates binding of aminoacyl-tRNA to the ribosomal A site	.
	1-to-1	Anc_2.613	CAGL0L04950g		2418	0	0	1		YMR049C	ERB1	2424	0	0.975		0.025	inviable	Constituent of 66S pre-ribosomal particles; forms a complex with Nop7p and Ytm1p that is required for maturation of the large ribosomal subunit; required for maturation of the 25S and 5.8S ribosomal RNAs; homologous to mammalian Bop1	.
	1-to-1	Anc_7.513	CAGL0I08327g		1557	0	0	1		YER025W	GCD11	1584	0	0.975		0.025	inviable	Gamma subunit of the translation initiation factor eIF2; involved in the identification of the start codon; binds GTP when forming the ternary complex with GTP and tRNAi-Met; mutations in human ortholog cause X-linked intellectual disability (XLID)	.
	1-to-1	Anc_7.327	CAGL0J08844g		2400	1.89583	0	1		YDL148C	NOP14	2433	0	0.975		0.025	inviable	Nucleolar protein; forms a complex with Noc4p that mediates maturation and nuclear export of 40S ribosomal subunits; also present in the small subunit processome complex, which is required for processing of pre-18S rRNA	.
	1-to-1	Anc_5.247	CAGL0E06534g		1998	0	0	1		YJL010C	NOP9	2001	0	0.975		0.025	inviable	Essential subunit of U3-containing 90S preribosome; involved in production of 18S rRNA and assembly of small ribosomal subunit; also part of pre-40S ribosome and required for its export into cytoplasm; binds RNA and contains pumilio domain	.
	1-to-1	Anc_8.444	CAGL0K11374g		1860	0	0	1		YDR228C	PCF11	1881	0	0.975		0.025	inviable	mRNA 3' end processing factor; essential component of cleavage and polyadenylation factor IA (CF IA), involved in pre-mRNA 3' end processing and in transcription termination; binds C-terminal domain of largest subunit of RNA pol II (Rpo21p); required for gene looping; relocalizes to the cytosol in response to hypoxia	.
	1-to-1	Anc_3.332	CAGL0D01716g		777	0	0	1		YBR088C	POL30	777	0	0.975		0.025	inviable	Proliferating cell nuclear antigen (PCNA); functions as the sliding clamp for DNA polymerase delta; may function as a docking site for other proteins required for mitotic and meiotic chromosomal DNA replication and for DNA repair	.
	1-to-1	Anc_5.426	CAGL0L11660g		4380	0.0456621	0	1		YOR116C	RPO31	4383	0	0.975		0.025	inviable	RNA polymerase III largest subunit C160; part of core enzyme; similar to bacterial beta-prime subunit and to RPA190 and RPO21	.
	1-to-1	Anc_2.447	CAGL0M05203g		2174	0.459982	0	1		YKL125W	RRN3	1884	0	0.975		0.025	inviable	Protein required for transcription of rDNA by RNA polymerase I; transcription factor independent of DNA template; involved in recruitment of RNA polymerase I to rDNA; structure reveals unique HEAT repeat fold and a surface serine patch; phosphorylation of serine patch impairs cell growth and reduces RNA polymerase I binding in vitro and RNA polymerase I recruitment to the rDNA gene in vivo	.
	1-to-1	Anc_4.110	CAGL0A00407g	SCL1	765	0	0	1		YGL011C	SCL1	759	0	0.975		0.025	inviable	Alpha 1 subunit of the 20S proteasome; involved in the degradation of ubiquitinated substrates; 20S proteasome is the core complex of the 26S proteasome; essential for growth; detected in the mitochondria	.
	1-to-1	Anc_5.146	CAGL0G09317g		741	0	0	1		YGR195W	SKI6	741	0	0.975		0.025	inviable	Exosome non-catalytic core component; involved in 3'-5' RNA processing and degradation in both the nucleus and the cytoplasm; has similarity to E. coli RNase PH and to human hRrp41p (EXOSC4)	.
	1-to-1	Anc_5.695	CAGL0L08250g		2589	0	0	1		YIL143C	SSL2	2532	0	0.975		0.025	inviable	Component of RNA polymerase transcription factor TFIIH holoenzyme; has DNA-dependent ATPase/helicase activity and is required, with Rad3p, for unwinding promoter DNA; interacts functionally with TFIIB and has roles in transcription start site selection and in gene looping to juxtapose initiation and termination regions; involved in DNA repair; relocalizes to the cytosol in response to hypoxia; ho…	.
	1-to-1	Anc_7.058	CAGL0E05390g	ALA1	2871	0.835946	0	1		YOR335C	ALA1	2877	0	0.98		0.02	inviable	Cytoplasmic and mitochondrial alanyl-tRNA synthetase; required for protein synthesis; point mutation (cdc64-1 allele) causes cell cycle arrest at G1; lethality of null mutation is functionally complemented by human homolog	.
	1-to-1	Anc_7.431	CAGL0K05115g		1104	0	0	1		YPR025C	CCL1	1182	0	0.98		0.02	inviable	Cyclin associated with protein kinase Kin28p; Kin28p is the TFIIH-associated carboxy-terminal domain (CTD) kinase involved in transcription initiation at RNA polymerase II promoters	.
	1-to-1	Anc_3.413	CAGL0K01045g		1905	1.88976	0	1		YGR083C	GCD2	1956	0	0.98		0.02	inviable	Delta subunit of the translation initiation factor eIF2B; the guanine-nucleotide exchange factor for eIF2; activity subsequently regulated by phosphorylated eIF2; first identified as a negative regulator of GCN4 expression	.
	1-to-1	Anc_1.477	CAGL0L01397g		2838	0.140944	0	1		YEL032W	MCM3	2916	0	0.98		0.02	inviable	Protein involved in DNA replication; component of the Mcm2-7 hexameric helicase complex that binds chromatin as a part of the pre-replicative complex	.
	1-to-1	Anc_6.193	CAGL0H03267g		2391	0.083647	0	1		YPL190C	NAB3	2409	0	0.98		0.02	inviable	RNA-binding protein, subunit of Nrd1 complex (Nrd1p-Nab3p-Sen1p); complex interacts with the exosome to mediate 3&#8242; end formation of some mRNAs, snRNAs, snoRNAs, and CUTs; required for termination of non-poly(A) transcripts and efficient splicing	.
	1-to-1	Anc_2.361	CAGL0L07238g		1266	0	0	1		YDL097C	RPN6	1305	0	0.98		0.02	inviable	Essential, non-ATPase regulatory subunit of the 26S proteasome lid; required for the assembly and activity of the 26S proteasome; the human homolog (S9 protein) partially rescues Rpn6p depletion; protein abundance increases in response to DNA replication stress	.
	1-to-1	Anc_4.230	CAGL0H04961g		1440	4.58333	0	1		YLR378C	SEC61	1443	0	0.98		0.02	inviable	Conserved ER protein translocation channel; essential subunit of Sec61 complex (Sec61p, Sbh1p, and Sss1p); forms a channel for SRP-dependent protein import and may be responsible for retrograde transport of misfolded proteins out of the ER; with Sec63 complex allows SRP-independent protein import into ER	.
	1-to-1	Anc_8.435	CAGL0C00737g		2451	0	0	1		YLR222C	UTP13	2454	0	0.98		0.02	inviable	Nucleolar protein; component of the small subunit (SSU) processome containing the U3 snoRNA that is involved in processing of pre-18S rRNA	.
	1-to-1	Anc_1.352	CAGL0A02090g		2022	0.074184	0	1		YHR020W		2067	0	0.98		0.02	inviable	Prolyl-tRNA synthetase; N-terminal domain shows weak homology to prokaryotic posttransfer editing domain, but does not possess posttransfer editing activity; may interact with ribosomes, based on co-purification experiments	.
	1-to-1	Anc_8.690	CAGL0K09086g		1356	0	0	1		YOR250C	CLP1	1338	0	0.985		0.015	inviable	Component of the cleavage and polyadenylation factor I (CF I); CF 1, composed of the CF 1A complex (Rna14p, Rna15p, Clp1p, Pcf11p) and Hrp1, is involved in cleavage and polyadenylation of mRNA 3' ends; involved in both the endonucleolyitc cleavage and polyadenylation steps of mRNA 3'-end maturation	.
	1-to-1	Anc_5.430	CAGL0L11638g		1827	0	0	1		YDR365C	ESF1	1887	0	0.985		0.015	inviable	Nucleolar protein involved in pre-rRNA processing; depletion causes severely decreased 18S rRNA levels	.
	1-to-1	Anc_8.460	CAGL0J09636g		1593	0.125549	0	1		YDL207W	GLE1	1617	0	0.985		0.015	inviable	Cytoplasmic nucleoporin required for polyadenylated mRNA export; contains a nuclear export signal; when bound to inositol hexakisphosphate (IP6), functions as an activator for the Dbp5p ATPase activity at the nuclear pore complex during mRNA export; mediates translation initiation; required for efficient translation termination	.
	1-to-1	Anc_5.222	CAGL0J11066g		2016	0	0	1		YLR002C	NOC3	1992	0	0.985		0.015	inviable	Subunit of a nuclear complex with Noc2p and pre-replicative complexes; the Noc2p-Noc3p complex binds to 66S ribosomal precursors to mediate their maturation and intranuclear transport; binds to chromatin at active replication origins, and is required for pre-RC formation and maintenance during DNA replication licensing	.
	1-to-1	Anc_5.357	CAGL0J10758g		2142	0	0	1		YHR074W	QNS1	2145	0	0.985		0.015	inviable	Glutamine-dependent NAD(+) synthetase; essential for the formation of NAD(+) from nicotinic acid adenine dinucleotide	.
	1-to-1	Anc_2.408	CAGL0A03454g		1461	0	0	1		YLR033W	RSC58	1509	0	0.985		0.015	inviable	Component of the RSC chromatin remodeling complex; RSC functions in transcriptional regulation and elongation, chromosome stability, and establishing sister chromatid cohesion; involved in telomere maintenance	.
	1-to-1	Anc_3.426	CAGL0G03003g		3576	0.727069	0	1		YGR090W	UTP22	3714	0	0.985		0.015	inviable	Component of the small-subunit processome; required for nuclear export of tRNAs; may facilitate binding of Utp8p to aminoacylated tRNAs and their delivery to Los1p for export; conserved from yeast to mammals	.
	1-to-1	Anc_8.421	CAGL0F05269g		576	0	0	1		YLR229C	CDC42	576	0	0.99		0.01	inviable	Small rho-like GTPase; essential for establishment and maintenance of cell polarity; mutants have defects in the organization of actin and septins	.
	1-to-1	Anc_3.159	CAGL0K01551g		2910	0.274914	0	1		YDL031W	DBP10	2988	0	0.99		0.01	inviable	Putative ATP-dependent RNA helicase of the DEAD-box protein family; constituent of 66S pre-ribosomal particles; essential protein involved in ribosome biogenesis	.
	1-to-1	Anc_5.069	CAGL0I02354g		1314	0	0	1		YHR169W	DBP8	1296	0	0.99		0.01	inviable	ATPase, putative RNA helicase of the DEAD-box family; component of 90S preribosome complex involved in production of 18S rRNA and assembly of 40S small ribosomal subunit; ATPase activity stimulated by association with Esf2p	.
	1-to-1	Anc_1.367	CAGL0H04411g		3024	0	0	1		YOL021C	DIS3	3006	0	0.99		0.01	inviable	Exosome core complex catalytic subunit; possesses both endonuclease and 3'-5' exonuclease activity; involved in 3'-5' RNA processing and degradation in both the nucleus and the cytoplasm; has similarity to E. coli RNase R and to human DIS3; mutations in Dis3p corresponding to human mutations implicated in multiple myeloma cause phenotypes suggesting impaired exosome function; protein abundance in…	.
	1-to-1	Anc_1.085	CAGL0J08140g		3123	1.31284	0	1		YNL267W	PIK1	3201	0	0.99		0.01	inviable	Phosphatidylinositol 4-kinase; catalyzes first step in the biosynthesis of phosphatidylinositol-4,5-biphosphate; may control cytokinesis through the actin cytoskeleton; may control nonselective autophagy and mitophagy through trafficking of Atg9p	.
	1-to-1	Anc_7.028	CAGL0M12166g		2418	0	0	1		YAL043C	PTA1	2358	0	0.99		0.01	inviable	Subunit of holo-CPF; holo-CPF is a multiprotein complex and functional homolog of mammalian CPSF, required for the cleavage and polyadenylation of mRNA and snoRNA 3' ends; involved in pre-tRNA processing; binds to the phosphorylated CTD of RNAPII	.
	1-to-1	Anc_5.497	CAGL0L04246g	RPB2	3672	0	0	1		YOR151C	RPB2	3675	0	0.99		0.01	inviable	RNA polymerase II second largest subunit B150; part of central core; similar to bacterial beta subunit	.
	1-to-1	Anc_5.271	CAGL0J00605g		2952	0	0	1		YHR027C	RPN1	2982	0	0.99		0.01	inviable	Non-ATPase base subunit of the 19S RP of the 26S proteasome; may participate in the recognition of several ligands of the proteasome; contains a leucine-rich repeat (LRR) domain, a site for protein-protein interactions; RP is the acronym for regulatory particle	.
	1-to-1	Anc_3.121	CAGL0L06754g		1317	0	0	1		YBR143C	SUP45	1314	0	0.99		0.01	inviable	Polypeptide release factor (eRF1) in translation termination; mutant form acts as a recessive omnipotent suppressor; methylated by Mtq2p-Trm112p in ternary complex eRF1-eRF3-GTP; mutation of methylation site confers resistance to zymocin; has a role in cytokinesis through interaction with Mlc1p	.
	1-to-1	Anc_5.671	CAGL0G02167g		2481	0.584442	0	1		YKR079C	TRZ1	2517	0	0.99		0.01	inviable	tRNA 3'-end processing endonuclease tRNase Z; also localized to mitochondria and interacts genetically with Rex2 exonuclease; homolog of the human candidate prostate cancer susceptibility gene ELAC2	.
	1-to-1	Anc_3.391	CAGL0K07920g		1428	0	0	1		YPR085C	ASA1	1332	0	0.995		0.005	inviable	Subunit of the ASTRA complex, involved in chromatin remodeling; telomere length regulator involved in the stability or biogenesis of PIKKs such as TORC1	.
	1-to-1	Anc_8.292	CAGL0M11550g		1929	0	0	1		YLR103C	CDC45	1953	0	0.995		0.005	inviable	DNA replication initiation factor; recruited to MCM pre-RC complexes at replication origins; promotes release of MCM from Mcm10p, recruits elongation machinery; mutants in human homolog may cause velocardiofacial and DiGeorge syndromes	.
	1-to-1	Anc_5.588	CAGL0E04334g	ERG11	1602	0	0	1		YHR007C	ERG11	1593	0	0.995		0.005	inviable	Lanosterol 14-alpha-demethylase; catalyzes the C-14 demethylation of lanosterol to form 4,4''-dimethyl cholesta-8,14,24-triene-3-beta-ol in the ergosterol biosynthesis pathway; member of the cytochrome P450 family; associated and coordinately regulated with the P450 reductase Ncp1p	.
	1-to-1	Anc_5.046	CAGL0M13475g		2763	0	0	1		YMR288W	HSH155	2916	0	0.995		0.005	inviable	U2-snRNP associated splicing factor; forms extensive associations with the branch site-3' splice site-3' exon region upon prespliceosome formation; similarity to the mammalian U2 snRNP-associated splicing factor SAP155	.
	1-to-1	Anc_3.275	CAGL0K12012g	KRS1	1776	0.957207	0	1		YDR037W	KRS1	1776	0	0.995		0.005	inviable	Lysyl-tRNA synthetase	.
	1-to-1	Anc_3.322	CAGL0F04323g		1986	0	0	1		YBL035C	POL12	2118	0	0.995		0.005	inviable	B subunit of DNA polymerase alpha-primase complex; required for initiation of DNA replication during mitotic and premeiotic DNA synthesis; also functions in telomere capping and length regulation	.
	1-to-1	Anc_8.237	CAGL0L11924g		2328	0	0	1		YER171W	RAD3	2337	0	0.995		0.005	inviable	5' to 3' DNA helicase; involved in nucleotide excision repair and transcription; subunit of RNA polII initiation factor TFIIH and of Nucleotide Excision Repair Factor 3 (NEF3); homolog of human XPD protein; mutant has aneuploidy tolerance; protein abundance increases in response to DNA replication stress	.
	1-to-1	Anc_5.337	CAGL0J10912g		1482	0	0	1		YHR065C	RRP3	1506	0	0.995		0.005	inviable	Protein involved in rRNA processing; required for maturation of the 35S primary transcript of pre-rRNA and for cleavage leading to mature 18S rRNA; homologous to eIF-4a, which is a DEAD box RNA-dependent ATPase with helicase activity	.
	1-to-1	Anc_8.009	CAGL0K12848g	SEC53	768	0	0	1		YFL045C	SEC53	765	0	0.995		0.005	inviable	Phosphomannomutase; involved in synthesis of GDP-mannose and dolichol-phosphate-mannose; required for folding and glycosylation of secretory proteins in the ER lumen	.
	1-to-1	Anc_5.414	CAGL0A02596g		2619	0.572738	0	1		YDR356W	SPC110	2835	0	0.995		0.005	inviable	Inner plaque spindle pole body (SPB) component; ortholog of human kendrin; involved in connecting nuclear microtubules to SPB; interacts with Tub4p-complex and calmodulin; phosphorylated by Mps1p in cell cycle-dependent manner	.
	1-to-1	Anc_3.184	CAGL0K01837g		933	1.50054	0	1		YDL015C	TSC13	933	0	0.995		0.005	inviable	Enoyl reductase; catalyzes the last step in each cycle of very long chain fatty acid elongation; localizes to the ER, highly enriched in a structure marking nuclear-vacuolar junctions; coimmunoprecipitates with elongases Fen1p and Sur4p; protein increases in abundance and relative distribution to ER foci increases upon DNA replication stress	.
	1-to-1	Anc_5.040	CAGL0M13519g		1485	0	0	1		YMR290C	HAS1	1518	0	0.998333		0.00166667	inviable	ATP-dependent RNA helicase; involved in the biogenesis of 40S and 60S ribosome subunits; localizes to both the nuclear periphery and nucleolus; highly enriched in nuclear pore complex fractions; constituent of 66S pre-ribosomal particles	.
	1-to-1	Anc_3.234	CAGL0D04466g		669	0	0	1		YDR013W	PSF1	627	0	0.999545		0.000454545	inviable	Subunit of the GINS complex (Sld5p, Psf1p, Psf2p, Psf3p); complex is localized to DNA replication origins and implicated in assembly of the DNA replication machinery	.
	1-to-1	Anc_8.646	CAGL0J04070g		453	0	0	1		YOR224C	RPB8	441	0	0.999545		0.000454545	inviable	RNA polymerase subunit ABC14.5; common to RNA polymerases I, II, and III	.
	1-to-1	Anc_5.504	CAGL0L04350g		285	1.92982	0	1		YOR159C	SME1	285	0	0.999545		0.000454545	inviable	Core Sm protein Sm E; part of heteroheptameric complex (with Smb1p, Smd1p, Smd2p, Smd3p, Smx3p, and Smx2p) that is part of the spliceosomal U1, U2, U4, and U5 snRNPs; homolog of human Sm E	.
	1-to-1	Anc_8.864	CAGL0H04081g	ERG13	1386	0	0	1		YML126C	ERG13	1476	0	1		0	inviable	3-hydroxy-3-methylglutaryl-CoA (HMG-CoA) synthase; catalyzes the formation of HMG-CoA from acetyl-CoA and acetoacetyl-CoA; involved in the second step in mevalonate biosynthesis	.
	1-to-1	Anc_1.184	CAGL0M08448g		2766	1.71728	0	1		YKL165C	MCD4	2760	0	1		0	inviable	Protein involved in GPI anchor synthesis; multimembrane-spanning protein that localizes to the endoplasmic reticulum; highly conserved among eukaryotes; GPI stands for glycosylphosphatidylinositol	.
	1-to-1	Anc_2.167	CAGL0L03806g		768	0	0	1		YNL110C	NOP15	663	0	1		0	inviable	Constituent of 66S pre-ribosomal particles; involved in 60S ribosomal subunit biogenesis; localizes to both nucleolus and cytoplasm	.
	1-to-1	Anc_8.259	CAGL0L12188g		4197	0.0476531	0	1		YLR086W	SMC4	4257	0	1		0	inviable	Subunit of the condensin complex; condensin reorganizes chromosomes during both mitosis and meiosis; forms a subcomplex with Smc2p that has ATP-hydrolyzing and DNA-binding activity, but other condensin subunits are required for chromatin binding; required for tRNA gene clustering at the nucleolus; potential Cdc28p substrate	.
	1-to-1	Anc_5.198	CAGL0D03300g		741	0.337382	0	0.9995		YLR022C	SDO1	753	0	0.943106		0.0563942	inviable	Guanine nucleotide exchange factor (GEF) for Ria1p; essential protein involved in ribosome maturation; with Ria1p, promotes release of Tif6p from 60S ribosomal subunits in the cytoplasm so that they can assemble with 40S subunits to generate mature ribosomes; ortholog of the human protein (SBDS) responsible for autosomal recessive Shwachman-Bodian-Diamond Syndrome; highly conserved across archaea…	.
	1-to-1	Anc_6.340	CAGL0J03476g		1554	0	0	0.99875		YCR072C	RSA4	1548	0	0.901667		0.0970833	inviable	WD-repeat protein involved in ribosome biogenesis; may interact with ribosomes; required for maturation and efficient intra-nuclear transport or pre-60S ribosomal subunits, localizes to the nucleolus	.
	1-to-1	Anc_3.329	CAGL0H08580g		1866	0	0	0.998712		YPR048W	TAH18	1872	0	0.87		0.128712	inviable	Conserved NAPDH-dependent diflavin reductase; component of an early step in the cytosolic Fe-S protein assembly (CIA) machinery; transfers electrons from NADPH to the Fe-S cluster of Dre2p; plays a pro-death role under oxidative stress; Tah18p-dependent nitric oxide synthesis confers high-temperature stress tolerance	.
	1-to-1	Anc_8.137	CAGL0K02233g		786	0	0	0.996702		YER126C	NSA2	786	0	0.935		0.0617024	inviable	Protein constituent of 66S pre-ribosomal particles; contributes to processing of the 27S pre-rRNA	.
	1-to-1	Anc_6.156	CAGL0J10384g		929	0	0	0.995		YGL103W	RPL28	961	0	0.635		0.36	inviable	Ribosomal 60S subunit protein L28; homologous to mammalian ribosomal protein L27A and bacterial L15; may have peptidyl transferase activity; can mutate to cycloheximide resistance	.
	1-to-1	Anc_3.190	CAGL0I04576g		450	6.11111	0	0.995		YDL008W	APC11	498	0	0.695		0.3	inviable	Catalytic core subunit, Anaphase-Promoting Complex/Cyclosome (APC/C); which is a ubiquitin-protein ligase required for degradation of anaphase inhibitors, including mitotic cyclins, during the metaphase/anaphase transition; contains a RING-H2 domain that is required for activity	.
	1-to-1	Anc_8.698	CAGL0G07469g		2007	2.06776	0	0.995		YOR254C	SEC63	1992	0	0.725		0.27	inviable	Essential subunit of Sec63 complex; with Sec61 complex, Kar2p/BiP and Lhs1p forms a channel competent for SRP-dependent and post-translational SRP-independent protein targeting and import into the ER; other members are Sec63p, Sec62p, Sec66p and Sec72p	.
	1-to-1	Anc_3.033	CAGL0M03993g		840	0	0	0.995		YNL312W	RFA2	930	0	0.81		0.185	inviable	Subunit of heterotrimeric Replication Protein A (RPA); RPA is a highly conserved single-stranded DNA binding protein involved in DNA replication, repair, and recombination; protein abundance increases in response to DNA replication stress	.
	1-to-1	Anc_5.081	CAGL0F08129g	SDA1	2238	0	0	0.995		YGR245C	SDA1	2304	0	0.83		0.165	inviable	Protein required for actin organization and passage through Start; highly conserved nuclear protein; required for actin cytoskeleton organization; plays a critical role in G1 events; binds Nap1p; involved in 60S ribosome biogenesis	.
	1-to-1	Anc_5.685	CAGL0K05533g		726	0	0	0.995		YOR077W	RTS2	699	0	0.86		0.135	inviable	Basic zinc-finger protein; similar to human and mouse Kin17 proteins which are chromatin-associated proteins involved in UV response and DNA replication	.
	1-to-1	Anc_4.197	CAGL0B02794g		1449	0	0	0.995		YLR359W	ADE13	1449	0	0.865		0.13	inviable	Adenylosuccinate lyase; catalyzes two steps in the 'de novo' purine nucleotide biosynthetic pathway; expression is repressed by adenine and activated by Bas1p and Pho2p; mutations in human ortholog ADSL cause adenylosuccinase deficiency	.
	1-to-1	Anc_7.252	CAGL0M12595g		465	0	0	0.995		YIL062C	ARC15	465	0	0.865		0.13	inviable	Subunit of the ARP2/3 complex; ARP2/3 is required for the motility and integrity of cortical actin patches; has mRNA binding activity	.
	1-to-1	Anc_5.678	CAGL0K05467g	CDC21	897	0	0	0.995		YOR074C	CDC21	915	0	0.875		0.12	inviable	Thymidylate synthase; required for de novo biosynthesis of pyrimidine deoxyribonucleotides; expression is induced at G1/S	.
	1-to-1	Anc_6.271	CAGL0H00869g		1791	0	0	0.995		YPL243W	SRP68	1800	0	0.88		0.115	inviable	Core component of the signal recognition particle (SRP) complex; SRP complex functions in targeting nascent secretory proteins to the endoplasmic reticulum (ER) membrane; relocalizes from cytoplasm to the nuclear periphery upon DNA replication stress	.
	1-to-1	Anc_7.441	CAGL0M09361g		3435	0	0	0.995		YBL105C	PKC1	3456	0	0.89		0.105	inviable	Protein serine/threonine kinase; essential for cell wall remodeling during growth; localized to sites of polarized growth and the mother-daughter bud neck; homolog of the alpha, beta, and gamma isoforms of mammalian protein kinase C (PKC)	.
	1-to-1	Anc_8.822	CAGL0H02211g		1146	0	0	0.995		YMR268C	PRP24	1335	0	0.905		0.09	inviable	Splicing factor that reanneals snRNPs during spliceosome recycling; reanneals U4 and U6 snRNPs	.
	1-to-1	Anc_8.839	CAGL0M02959g		2277	0	0	0.995		YMR277W	FCP1	2199	0	0.91		0.085	inviable	Carboxy-terminal domain (CTD) phosphatase; essential for dephosphorylation of the repeated C-terminal domain of the RNA polymerase II large subunit (Rpo21p); relocalizes to the cytosol in response to hypoxia	.
	1-to-1	Anc_8.233	CAGL0L11858g	CCA1	1596	0	0	0.995		YER168C	CCA1	1641	0	0.915		0.08	inviable	ATP (CTP):tRNA-specific tRNA nucleotidyltransferase; different forms targeted to the nucleus, cytosol, and mitochondrion are generated via the use of multiple transcriptional and translational start sites	.
	1-to-1	Anc_5.163	CAGL0G06908g		1617	0	0	0.995		YJL014W	CCT3	1605	0	0.915		0.08	inviable	Subunit of the cytosolic chaperonin Cct ring complex; related to Tcp1p, required for the assembly of actin and tubulins in vivo	.
	1-to-1	Anc_7.480	CAGL0F04477g		729	0	0	0.995		YBL041W	PRE7	726	0	0.921208		0.0737916	inviable	Beta 6 subunit of the 20S proteasome	.
	1-to-1	Anc_5.251	CAGL0E06490g		1419	0	0	0.995		YKL145W	RPT1	1404	0	0.921208		0.0737916	inviable	ATPase of the 19S regulatory particle of the 26S proteasome; one of six ATPases of the regulatory particle; involved in the degradation of ubiquitinated substrates; required for optimal CDC20 transcription; interacts with Rpn12p and Ubr1p; mutant has aneuploidy tolerance	.
	1-to-1	Anc_5.028	CAGL0G00440g		1677	0	0	0.995		YMR296C	LCB1	1677	0	0.925		0.07	inviable	Component of serine palmitoyltransferase; responsible along with Lcb2p for the first committed step in sphingolipid synthesis, which is the condensation of serine with palmitoyl-CoA to form 3-ketosphinganine	.
	1-to-1	Anc_8.125	CAGL0L05852g		1515	3.59736	0	0.995		YGL172W	NUP49	1419	0	0.925		0.07	inviable	FG-nucleoporin component of central core of the nuclear pore complex; contributes directly to nucleocytoplasmic transport and maintenance of the nuclear pore complex (NPC) permeability barrier; found in stable complex with Nic96p and two other FG-nucleoproteins (Nsp1p and Nup57p)	.
	1-to-1	Anc_1.269	CAGL0L03564g		651	0	0	0.995		YJL097W	PHS1	654	0	0.925		0.07	inviable	Essential 3-hydroxyacyl-CoA dehydratase of the ER membrane; involved in elongation of very long-chain fatty acids; evolutionarily conserved, similar to mammalian PTPLA and PTPLB; involved in sphingolipid biosynthesis and protein trafficking	.
	1-to-1	Anc_1.095	CAGL0J08008g		1419	3.10078	0	0.995		YNL261W	ORC5	1440	0	0.93		0.065	inviable	Subunit of the origin recognition complex (ORC); ORC directs DNA replication by binding to replication origins and is also involved in transcriptional silencing	.
	1-to-1	Anc_7.343	CAGL0I03410g		2175	2.85057	0	0.995		YDL164C	CDC9	2268	0	0.935		0.06	inviable	DNA ligase found in the nucleus and mitochondria; an essential enzyme that joins Okazaki fragments during DNA replication; also acts in nucleotide excision repair, base excision repair, and recombination	.
	1-to-1	Anc_5.507	CAGL0L04312g		786	0	0	0.995		YOR157C	PUP1	786	0	0.935		0.06	inviable	Beta 2 subunit of the 20S proteasome; endopeptidase with trypsin-like activity that cleaves after basic residues; synthesized as a proprotein before being proteolytically processed for assembly into 20S particle; human homolog is subunit Z	.
	1-to-1	Anc_7.398	CAGL0G03311g		3219	0	0	0.995		YBL076C	ILS1	3219	0	0.94		0.055	inviable	Cytoplasmic isoleucine-tRNA synthetase; target of the G1-specific inhibitor reveromycin A	.
	1-to-1	Anc_6.051	CAGL0L04532g		2388	0	0	0.995		YOR168W	GLN4	2430	0	0.943106		0.0518942	inviable	Glutamine tRNA synthetase; monomeric class I tRNA synthetase that catalyzes the specific glutaminylation of tRNA(Glu); N-terminal domain proposed to be involved in enzyme-tRNA interactions	.
	1-to-1	Anc_7.263	CAGL0J03245g		555	0	0	0.995		YER074W-A	YOS1	471	0	0.943106		0.0518942	inviable	Integral membrane protein required for ER to Golgi transport; localized to the Golgi, the ER, and COPII vesicles; interacts with Yip1p and Yif1p	.
	1-to-1	Anc_4.376	CAGL0M00264g		1074	0	0	0.995		YJR141W		1044	0	0.943106		0.0518942	inviable	Essential protein of unknown function	.
	1-to-1	Anc_1.332	CAGL0J04928g		3198	0	0	0.995		YJL050W	MTR4	3222	0	0.944464		0.0505357	inviable	ATP-dependent 3'-5' RNA helicase of the DExD/H family; involved in nuclear RNA processing and degradation both as a component of TRAMP complex and in TRAMP-independent processes; TRAMP unwinds RNA duplexes, with Mtr4p unwinding activity stimulated by Pap2p/Air2p but not dependent on ongoing polyadenylation; contains an arch domain, with two coiled-coil arms/stalks and a globular fist/KOW domain, …	.
	1-to-1	Anc_1.275	CAGL0L03432g		1461	0	0	0.995		YJL091C	GWT1	1473	0	0.945		0.05	inviable	Protein involved in the inositol acylation of GlcN-PI; the inositol acylation of glucosaminyl phosphatidylinositol (GlcN-PI) forms glucosaminyl(acyl)phosphatidylinositol (GlcN(acyl)PI), an intermediate in the biosynthesis of glycosylphosphatidylinositol (GPI) anchors	.
	1-to-1	Anc_8.422	CAGL0F07887g		1680	0	0	0.995		YDR212W	TCP1	1680	0	0.945		0.05	inviable	Alpha subunit of chaperonin-containing T-complex; complex mediates protein folding in the cytosol; involved in actin cytoskeleton maintenance; overexpression in neurons suppresses formation of pathogenic conformations of huntingtin protein	.
	1-to-1	Anc_8.757	CAGL0M04829g		5121	0	0	0.995		YMR229C	RRP5	5190	0	0.95		0.045	inviable	RNA binding protein involved in synthesis of both 18S and 5.8S rRNAs; component of both the ribosomal small subunit (SSU) processosome and the 90S preribosome; has binding preference for single stranded tracts of U's; relocalizes from nucleolus to nucleus upon DNA replication stress	.
	1-to-1	Anc_2.648	CAGL0F06721g		513	3.21637	0	0.995		YIR022W	SEC11	504	0	0.955		0.04	inviable	18kDa catalytic subunit of the Signal Peptidase Complex (SPC); the Signal Peptidase Complex cleaves the signal sequence of proteins targeted to the endoplasmic reticulum; other members are Spc1p, Spc2p, Spc3p, and Sec11p	.
	1-to-1	Anc_8.111	CAGL0I04290g		1269	0	0	0.995		YGL169W	SUA5	1281	0	0.955		0.04	inviable	Single-stranded telomeric DNA-binding protein; required for normal telomere length; null mutant lacks N6-threonylcarbamoyl adenosine (t6A) modification in the anticodon loop of ANN-decoding tRNA; member of conserved YrdC/Sua5 family	.
	1-to-1	Anc_5.564	CAGL0K06215g		1362	0	0	0.995		YDR449C	UTP6	1323	0	0.955		0.04	inviable	Nucleolar protein; component of the small subunit (SSU) processome containing the U3 snoRNA that is involved in processing of pre-18S rRNA	.
	1-to-1	Anc_8.324	CAGL0M04279g		2823	0	0	0.995		YLR129W	DIP2	2832	0	0.96		0.035	inviable	Nucleolar protein; specifically associated with the U3 snoRNA, part of the large ribonucleoprotein complex known as the small subunit (SSU) processome, required for 18S rRNA biogenesis, part of the active pre-rRNA processing complex	.
	1-to-1	Anc_1.094	CAGL0J08030g		6654	0.247971	0	0.995		YNL262W	POL2	6669	0	0.96		0.035	inviable	Catalytic subunit of DNA polymerase (II) epsilon; a chromosomal DNA replication polymerase that exhibits processivity and proofreading exonuclease activity; also involved in DNA synthesis during DNA repair; interacts extensively with Mrc1p	.
	1-to-1	Anc_3.004	CAGL0D02596g		750	0	0	0.995		YOL146W	PSF3	585	0	0.96		0.035	inviable	Subunit of the GINS complex (Sld5p, Psf1p, Psf2p, Psf3p); complex is localized to DNA replication origins and implicated in assembly of the DNA replication machinery	.
	1-to-1	Anc_7.329	CAGL0I03630g		1284	0	0	0.995		YDL150W	RPC53	1269	0	0.96		0.035	inviable	RNA polymerase III subunit C53	.
	1-to-1	Anc_8.395	CAGL0F05643g		1374	0	0	0.995		YDR190C	RVB1	1392	0	0.96		0.035	inviable	ATP-dependent DNA helicase, also known as pontin; member of the AAA+ and RuvB-like protein families; similar to Rvb2p; conserved component of multiple complexes including the INO80 complex, the Swr1 complex, and the R2TP complex (Rvb1-Rvb2-Tah1-Pih1); involved in multiple processes such as chromatin remodeling, box C/D snoRNP assembly, and RNA polymerase II assembly	.
	1-to-1	Anc_7.280	CAGL0M12991g		2181	0	0	0.995		YIL078W	THS1	2205	0	0.96		0.035	inviable	Threonyl-tRNA synthetase; essential cytoplasmic protein	.
	1-to-1	Anc_5.316	CAGL0H01419g		1569	2.99554	0	0.995		YDR299W	BFR2	1605	0	0.965		0.03	inviable	Essential protein that is a component of 90S preribosomes; may be involved in rRNA processing; multicopy suppressor of sensitivity to Brefeldin A; expression is induced during lag phase and also by cold shock	.
	1-to-1	Anc_6.234	CAGL0E05874g		3513	0	0	0.995		YPL217C	BMS1	3552	0	0.965		0.03	inviable	GTPase required for ribosomal subunit synthesis and rRNA processing; required for synthesis of 40S ribosomal subunits and for processing the 35S pre-rRNA at sites A0, A1, and A2; interacts with Rcl1p, which stimulates its GTPase and U3 snoRNA binding activities; has similarity to Tsr1p	.
	1-to-1	Anc_8.673	CAGL0J03696g		1341	0	0	0.995		YOR244W	ESA1	1338	0	0.965		0.03	inviable	Catalytic subunit of the histone acetyltransferase complex (NuA4); acetylates four conserved internal lysines of histone H4 N-terminal tail and can acetylate histone H2A; required for cell cycle progression and transcriptional silencing at the rDNA locus and regulation of autophagy	.
	1-to-1	Anc_6.148	CAGL0K07029g		2451	0	0	0.995		YBR237W	PRP5	2550	0	0.965		0.03	inviable	RNA helicase in the DEAD-box family; necessary for prespliceosome formation, bridges U1 and U2 snRNPs and enables stable U2 snRNP association with intron RNA	.
	1-to-1	Anc_6.287	CAGL0L10604g		678	0.147493	0	0.995		YMR197C	VTI1	654	0	0.965		0.03	inviable	Protein involved in cis-Golgi membrane traffic; v-SNARE that interacts with two t-SNARES, Sed5p and Pep12p; required for multiple vacuolar sorting pathways	.
	1-to-1	Anc_4.206	CAGL0K04477g		927	0.323625	0	0.995		YGR060W	ERG25	930	0	0.97		0.025	inviable	C-4 methyl sterol oxidase; catalyzes the first of three steps required to remove two C-4 methyl groups from an intermediate in ergosterol biosynthesis; mutants accumulate the sterol intermediate 4,4-dimethylzymosterol	.
	1-to-1	Anc_2.022	CAGL0K05049g		2574	0.3108	0	0.995		YNL221C	POP1	2628	0	0.97		0.025	inviable	Subunit of both RNase MRP and nuclear RNase P; RNase MRP cleaves pre-rRNA, while nuclear RNase P cleaves tRNA precursors to generate mature 5' ends and facilitates turnover of nuclear RNAs; binds to the RPR1 RNA subunit in RNase P	.
	1-to-1	Anc_3.251	CAGL0K11726g		1377	0	0	0.995		YDR023W	SES1	1389	0	0.975		0.02	inviable	Cytosolic seryl-tRNA synthetase; class II aminoacyl-tRNA synthetase that aminoacylates tRNA(Ser), displays tRNA-dependent amino acid recognition which enhances discrimination of the serine substrate, interacts with peroxin Pex21p	.
	1-to-1	Anc_6.219	CAGL0M05731g		1377	0	0	0.995		YGL065C	ALG2	1512	0	0.985		0.01	inviable	Mannosyltransferase in the N-linked glycosylation pathway; catalyzes two consecutive steps in the N-linked glycosylation pathway; alg2 mutants exhibit temperature-sensitive growth and abnormal accumulation of the lipid-linked oligosaccharide Man2GlcNAc2-PP-Dol	.
	1-to-1	Anc_5.213	CAGL0D03080g		1887	0	0	0.995		YLL004W	ORC3	1851	0	0.985		0.01	inviable	Subunit of the origin recognition complex (ORC); ORC directs DNA replication by binding to replication origins and is also involved in transcriptional silencing	.
	1-to-1	Anc_8.672	CAGL0M02277g		1284	0	0	0.995		YPL151C	PRP46	1356	0	0.985		0.01	inviable	Member of the NineTeen Complex (NTC); this complex contains Prp19p and stabilizes U6 snRNA in catalytic forms of the spliceosome containing U2, U5, and U6 snRNAs	.
	1-to-1	Anc_6.325	CAGL0K09284g		2736	0	0	0.995		YCR057C	PWP2	2772	0	0.985		0.01	inviable	Conserved 90S pre-ribosomal component; essential for proper endonucleolytic cleavage of the 35 S rRNA precursor at A0, A1, and A2 sites; contains eight WD-repeats; PWP2 deletion leads to defects in cell cycle and bud morphogenesis	.
	1-to-1	Anc_8.544	CAGL0M05335g		2421	0	0	0.995		YBR198C	TAF5	2397	0	0.985		0.01	inviable	Subunit (90 kDa) of TFIID and SAGA complexes; involved in RNA polymerase II transcription initiation and in chromatin modification	.
	1-to-1	Anc_3.561	CAGL0H07821g		2886	0	0	0.995		YGL238W	CSE1	2883	0	0.988102		0.00689768	inviable	Nuclear envelope protein that mediates the nuclear export of Srp1p; Srp1p (importin alpha) is a homolog of metazoan CAS protein; required for accurate chromosome segregation	.
	1-to-1	Anc_2.467	CAGL0J01243g	CTF13	1404	0.14245	0	0.995		YMR094W	CTF13	1437	0	0.99		0.005	inviable	Subunit of the CBF3 complex; CBF3 binds to the CDE III element of centromeres, bending the DNA upon binding, and may be involved in sister chromatid cohesion during mitosis	.
	1-to-1	Anc_6.165	CAGL0C01639g		1416	0	0	0.995		YBR247C	ENP1	1452	0	0.99		0.005	inviable	Protein associated with U3 and U14 snoRNAs; required for pre-rRNA processing and 40S ribosomal subunit synthesis; localized in the nucleus and concentrated in the nucleolus	.
	1-to-1	Anc_5.375	CAGL0M01298g		1173	0	0	0.995		YDR331W	GPI8	1236	0	0.99		0.005	inviable	ER membrane glycoprotein subunit of the GPI transamidase complex; adds glycosylphosphatidylinositol (GPI) anchors to newly synthesized proteins; human PIG-K protein is a functional homolog	.
	1-to-1	Anc_3.509	CAGL0J06424g		2919	0.0685166	0	0.995		YGL201C	MCM6	3054	0	0.99		0.005	inviable	Protein involved in DNA replication; component of the Mcm2-7 hexameric helicase complex that binds chromatin as a part of the pre-replicative complex; forms a subcomplex with Mcm4p and Mcm7p	.
	1-to-1	Anc_8.721	CAGL0L10890g		1374	0.14556	0	0.995		YOR272W	YTM1	1383	0	0.99		0.005	inviable	Constituent of 66S pre-ribosomal particles; forms a complex with Nop7p and Erb1p that is required for maturation of the large ribosomal subunit; has seven C-terminal WD repeats	.
	1-to-1	Anc_8.170	CAGL0J04444g		2640	0	0	0.995		YBL023C	MCM2	2607	0	0.995		0	inviable	Protein involved in DNA replication; component of the Mcm2-7 hexameric helicase complex that binds chromatin as a part of the pre-replicative complex; relative distribution to the nucleus increases upon DNA replication stress	.
	1-to-1	Anc_8.457	CAGL0K11000g		1635	6.97248	0	0.995		YDR235W	PRP42	1635	0	0.995		0	inviable	U1 snRNP protein involved in splicing; required for U1 snRNP biogenesis; contains multiple tetriatricopeptide repeats	.
	1-to-1	Anc_2.468	CAGL0K08602g		1053	0	0	0.995		YKL108W	SLD2	1362	0	0.995		0	inviable	Single-stranded DNA origin-binding and annealing protein; required for the initiation of DNA replication; phosphorylated in S phase by cyclin-dependent kinases (Cdks), promoting origin binding, DNA replication and Dpb11p complex formation; component of the preloading complex; unphosphorylated or CDK-phosphorylated Sld2p binds to the MCM2-7 complex;required for the S phase checkpoint; relative dis…	.
	1-to-1	Anc_8.023	CAGL0K12694g	ACT1	2007	0	0	0.995		YFL039C	ACT1	1437	0	0.999545		-0.00454546	inviable	Actin; structural protein involved in cell polarization, endocytosis, and other cytoskeletal functions	.
	1-to-1	Anc_8.552	CAGL0M05225g		1146	0	0	0.995		YBR192W	RIM2	1134	0	0.999545		-0.00454546	inviable	Mitochondrial pyrimidine nucleotide transporter; imports pyrimidine nucleoside triphosphates and exports pyrimidine nucleoside monophosphates; member of the mitochondrial carrier family	.
	1-to-1	Anc_2.625	CAGL0F06435g		381	0	0	0.995		YMR059W	SEN15	387	0	0.999545		-0.00454546	inviable	Subunit of the tRNA splicing endonuclease; tRNA splicing endonuclease is composed of Sen2p, Sen15p, Sen34p, and Sen54p	.
	1-to-1	Anc_1.353	CAGL0A02112g		1647	0.121433	0	0.995		YHR019C	DED81	1665	0	1		-0.005	inviable	Cytosolic asparaginyl-tRNA synthetase; required for protein synthesis, catalyzes the specific attachment of asparagine to its cognate tRNA	.
	1-to-1	Anc_3.447	CAGL0G07843g		1797	0	0	0.995		YGR103W	NOP7	1818	0	1		-0.005	inviable	Component of several different pre-ribosomal particles; forms a complex with Ytm1p and Erb1p that is required for maturation of the large ribosomal subunit; required for exit from G<sub>0</sub> and the initiation of cell proliferation	.
	1-to-1	Anc_3.434	CAGL0G03113g		702	0.14245	0	0.995		YGR095C	RRP46	672	0	1		-0.005	inviable	Exosome non-catalytic core component; involved in 3'-5' RNA processing and degradation in both the nucleus and the cytoplasm; has similarity to E. coli RNase PH and to human hRrp46p (EXOSC5)	.
	1-to-1	Anc_1.109	CAGL0J07810g		1815	0	0	0.99		YNL251C	NRD1	1728	0	0.795		0.195	inviable	RNA-binding protein, subunit of Nrd1 complex (Nrd1p-Nab3p-Sen1p); complex interacts with the exosome to mediate 3&#8242; end formation of some mRNAs, snRNAs, snoRNAs, and CUTs; interacts with the C-terminal domain of the RNA polymerase II large subunit (Rpo21p), preferentially at phosphorylated Ser5, to direct transcription termination of non-polyadenylated transcripts; H3K4 trimethylation of tra…	.
	1-to-1	Anc_8.724	CAGL0F03795g		1455	0	0	0.99		YMR211W	DML1	1428	0	0.825		0.165	inviable	Essential protein involved in mtDNA inheritance; may also function in the partitioning of the mitochondrial organelle or in the segregation of chromosomes, exhibits regions similar to members of a GTPase family	.
	1-to-1	Anc_1.165	CAGL0C00341g		351	0.2849	0	0.99		YJL173C	RFA3	369	0	0.83		0.16	inviable	Subunit of heterotrimeric Replication Protein A (RPA); RPA is a highly conserved single-stranded DNA binding protein complex involved in DNA replication, repair, and recombination; protein abundance increases in response to DNA replication stress	.
	1-to-1	Anc_7.175	CAGL0L09603g		1422	1.75809	0	0.99		YIR010W	DSN1	1731	0	0.855		0.135	inviable	Essential component of the MIND kinetochore complex; joins kinetochore subunits contacting DNA to those contacting microtubules; important for chromosome segregation; complex consists of Mtw1p Including Nnf1p-Nsl1p-Dsn1p (MIND)	.
	1-to-1	Anc_1.426	CAGL0M03487g		954	0	0	0.99		YNR003C	RPC34	954	0	0.855		0.135	inviable	RNA polymerase III subunit C34; interacts with TFIIIB70 and is a key determinant in pol III recruitment by the preinitiation complex	.
	1-to-1	Anc_2.011	CAGL0J07458g		858	0.2331	0	0.99		YNL232W	CSL4	879	0	0.875		0.115	inviable	Exosome non-catalytic core component; involved in 3'-5' RNA processing and degradation in both the nucleus and the cytoplasm; predicted to contain an S1 RNA binding domain; has similarity to human hCsl4p (EXOSC1)	.
	1-to-1	Anc_6.144	CAGL0F07403g		1311	0	0	0.99		YGL111W	NSA1	1392	0	0.88		0.11	inviable	Constituent of 66S pre-ribosomal particles; involved in 60S ribosomal subunit biogenesis	.
	1-to-1	Anc_1.514	CAGL0F00517g		1365	0.03663	0	0.99		YJR065C	ARP3	1350	0	0.885		0.105	inviable	Essential component of the Arp2/3 complex; Arp2/3 is a highly conserved actin nucleation center required for the motility and integrity of actin patches; involved in endocytosis and membrane growth and polarity	.
	1-to-1	Anc_5.114	CAGL0B02233g		1824	0	0	0.99		YGR216C	GPI1	1830	0	0.895		0.095	inviable	Membrane protein involved in the synthesis of GlcNAc-PI; N-acetylglucosaminyl phosphatidylinositol (GlcNAc-PI) is the first intermediate in the synthesis of glycosylphosphatidylinositol (GPI) anchors; human and mouse GPI1p are functional homologs	.
	1-to-1	Anc_4.310	CAGL0M00990g		5940	0	0	0.99		YLR430W	SEN1	6696	0	0.895		0.095	inviable	Presumed helicase and subunit of the Nrd1 complex (Nrd1p-Nab3p-Sen1p); complex interacts with the exosome to mediate 3' end formation of some mRNAs, snRNAs, snoRNAs, and CUTs; has a separate role in coordinating DNA replication with transcription, by associating with moving replication forks and preventing errors that occur when forks encounter transcribed regions; homolog of Senataxin, which is …	.
	1-to-1	Anc_8.238	CAGL0L11946g		6423	0.0311381	0	0.99		YER172C	BRR2	6492	0	0.905		0.085	inviable	RNA-dependent ATPase RNA helicase (DEIH box); required for disruption of U4/U6 base-pairing in native snRNPs to activate the spliceosome for catalysis; homologous to human U5-200kD	.
	1-to-1	Anc_5.063	CAGL0I02464g		2451	3.30477	0	0.99		YHR172W	SPC97	2472	0	0.905		0.085	inviable	Component of the microtubule-nucleating Tub4p (gamma-tubulin) complex; interacts with Spc110p at the spindle pole body (SPB) inner plaque and with Spc72p at the SPB outer plaque	.
	1-to-1	Anc_1.206	CAGL0I05918g		486	0	0	0.99		YJL143W	TIM17	477	0	0.905		0.085	inviable	Essential component of the TIM23 complex; with Tim23p, contributes to the architecture and function of the import channel; may link the import motor to the core Translocase of the Inner Mitochondrial membrane (TIM23 complex)	.
	1-to-1	Anc_2.661	CAGL0L09801g	RAM2	975	0	0	0.99		YKL019W	RAM2	951	0	0.906244		0.0837558	inviable	Alpha subunit of farnesyltransferase and geranylgeranyltransferase-I; farnesyltransferase (RAM2-RAM1 heterodimer) catalyzes the addition of 15-carbon isoprenoid farnesyl to substrate proteins containing a CAAX consensus motif; type I geranylgeranyltransferase (RAM2-CDC43 heterodimer) catalyzes the addition of the 20-carbon isoprenoid geranylgeranyl to substrate proteins containing a CaaL consensu…	.
	1-to-1	Anc_8.571	CAGL0H05709g		1938	0.670795	0	0.99		YPL093W	NOG1	1944	0	0.91		0.08	inviable	Putative GTPase; associates with free 60S ribosomal subunits in the nucleolus and is required for 60S ribosomal subunit biogenesis; constituent of 66S pre-ribosomal particles; member of the ODN family of nucleolar G-proteins	.
	1-to-1	Anc_3.574	CAGL0A04719g		798	0.0626566	0	0.99		YFR050C	PRE4	801	0	0.915		0.075	inviable	Beta 7 subunit of the 20S proteasome	.
	1-to-1	Anc_3.571	CAGL0H07689g		540	0	0	0.99		YGL247W	BRR6	594	0	0.92		0.07	inviable	Essential nuclear envelope integral membrane protein; required for nuclear envelope morphology, nuclear pore complex localization, nuclear export; exhibits synthetic lethal genetic interactions with genes involved in lipid metabolism	.
	1-to-1	Anc_4.161	CAGL0J00209g		714	0	0	0.99		YGR024C	THG1	714	0	0.92		0.07	inviable	tRNAHis guanylyltransferase; adds a guanosine residue to the 5' end of tRNAH is after transcription and RNase P cleavage; can also catalyze reverse (3'-5') polymerization with certain substrates in a template-dependent reaction; couples nuclear division and migration to cell budding and cytokinesis; essential enzyme conserved among eukaryotes	.
	1-to-1	Anc_5.080	CAGL0F08151g		1797	1.36338	0	0.99		YGR246C	BRF1	1791	0	0.921208		0.0687916	inviable	TFIIIB B-related factor; one of three subunits of RNA polymerase III transcription initiation factor TFIIIB, binds TFIIIC and TBP and recruits RNA pol III to promoters, amino-terminal half is homologous to TFIIB	.
	1-to-1	Anc_3.394	CAGL0K07964g		1092	0	0	0.99		YPR086W	SUA7	1038	0	0.921208		0.0687916	inviable	Transcription factor TFIIB; a general transcription factor required for transcription initiation and start site selection by RNA polymerase II	.
	1-to-1	Anc_4.018	CAGL0D02772g		1602	0.31211	0	0.99		YLL036C	PRP19	1512	0	0.925		0.065	inviable	Splicing factor associated with the spliceosome; contains a U-box, a motif found in a class of ubiquitin ligases, and a WD40 domain; relocalizes to the cytosol in response to hypoxia	.
	1-to-1	Anc_1.245	CAGL0L03245g		1122	1.96078	0	0.99		YKR038C	KAE1	1161	0	0.93		0.06	inviable	Highly conserved ATPase of HSP70/DnaK family; component of the EKC/KEOPS complex with Bud32p, Cgi121p, Pcc1p, and Gon7p; EKC/KEOPS complex is required for t6A tRNA modification and may have roles in telomere maintenance and transcription	.
	1-to-1	Anc_8.555	CAGL0H05533g		5715	0.0349956	0	0.99		YPL082C	MOT1	5604	0	0.93		0.06	inviable	Essential protein involved in regulation of transcription; removes Spt15p (TBP) from DNA via its C-terminal ATPase activity, forms a complex with TBP that binds TATA DNA with high affinity but with altered specificity; the Mot1p-Spt15p-DNA ternary complex contains unbent DNA	.
	1-to-1	Anc_2.176	CAGL0G06666g		4365	2.47423	0	0.99		YNL102W	POL1	4407	0	0.935		0.055	inviable	Catalytic subunit of the DNA polymerase I alpha-primase complex; required for the initiation of DNA replication during mitotic DNA synthesis and premeiotic DNA synthesis	.
	1-to-1	Anc_7.493	CAGL0F04653g		879	0	0	0.99		YBL050W	SEC17	995	0	0.939324		0.0506757	inviable	Alpha-SNAP cochaperone; SNARE-complex adaptor for Sec18 (NSF) during the disassembly of postfusion cis-SNARE complexes; stimulates the ATPase activity of Sec18p; peripheral membrane protein required for vesicular transport between ER and Golgi, the 'priming' step in homotypic vacuole fusion, and autophagy; similar to mammalian alpha-SNAP	.
	1-to-1	Anc_2.665	CAGL0L09823g		2232	0.0224014	0	0.99		YKL022C	CDC16	2523	0	0.94		0.05	inviable	Subunit of the anaphase-promoting complex/cyclosome (APC/C); which is a ubiquitin-protein ligase required for degradation of anaphase inhibitors, including mitotic cyclins, during the metaphase/anaphase transition; required for sporulation; relocalizes to the cytosol in response to hypoxia	.
	1-to-1	Anc_3.043	CAGL0M03861g		1030	0	0	0.99		YOL127W	RPL25	843	0	0.943106		0.0468942	inviable	Ribosomal 60S subunit protein L25; primary rRNA-binding ribosomal protein component of large ribosomal subunit; binds to 25S rRNA via a conserved C-terminal motif; homologous to mammalian ribosomal protein L23A and bacterial L23	.
	1-to-1	Anc_7.509	CAGL0H00462g		678	0	0	0.99		YJR123W	RPS5	678	0	0.943106		0.0468942	inviable	Protein component of the small (40S) ribosomal subunit; least basic of non-acidic ribosomal proteins; phosphorylated in vivo; essential for viability; homologous to mammalian ribosomal protein S5 and bacterial S7	.
	1-to-1	Anc_8.134	CAGL0K02255g		2469	2.91616	0	0.99		YER125W	RSP5	2430	0	0.943106		0.0468942	inviable	E3 ubiquitin ligase of the NEDD4 family; involved in regulating many cellular processes including MVB sorting, heat shock response, transcription, endocytosis, and ribosome stability; human homolog is involved in Liddle syndrome; mutant tolerates aneuploidy; deubiquitinated by Ubp2p; autoubiquitinates and ubiquitinates Sec23p and Sna3p	.
	1-to-1	Anc_1.465	CAGL0I03234g		381	0	0	0.99		YEL026W	SNU13	381	0	0.943106		0.0468942	inviable	RNA binding protein; part of U3 snoRNP involved in rRNA processing, part of U4/U6-U5 tri-snRNP involved in mRNA splicing, similar to human 15.5K protein	.
	1-to-1	Anc_2.206	CAGL0L08272g		1581	0	0	0.99		YIL142W	CCT2	1584	0	0.945		0.045	inviable	Subunit beta of the cytosolic chaperonin Cct ring complex; related to Tcp1p, required for the assembly of actin and tubulins in vivo	.
	1-to-1	Anc_8.559	CAGL0H05555g		1329	0	0	0.99		YPL083C	SEN54	1404	0	0.945		0.045	inviable	Subunit of the tRNA splicing endonuclease; tRNA splicing endonuclease is composed of Sen2p, Sen15p, Sen34p, and Sen54p	.
	1-to-1	Anc_6.181	CAGL0H03091g		1005	0	0	0.99		YGL091C	NBP35	987	0	0.95		0.04	inviable	Essential cytoplasmic iron-sulfur cluster binding protein; forms a complex with Cfd1p that is involved in iron-sulfur protein assembly in the cytosol; similar to P-loop NTPases	.
	1-to-1	Anc_1.428	CAGL0L07722g	PGK1	1251	0	0	0.99		YCR012W	PGK1	1251	0	0.95		0.04	inviable	3-phosphoglycerate kinase; catalyzes transfer of high-energy phosphoryl groups from the acyl phosphate of 1,3-bisphosphoglycerate to ADP to produce ATP; key enzyme in glycolysis and gluconeogenesis	.
	1-to-1	Anc_6.257	CAGL0E06138g		5652	0.999646	0	0.99		YPL231W	FAS2	5664	0	0.955		0.035	inviable	Alpha subunit of fatty acid synthetase; complex catalyzes the synthesis of long-chain saturated fatty acids; contains the acyl-carrier protein domain and beta-ketoacyl reductase, beta-ketoacyl synthase and self-pantetheinylation activities	.
	1-to-1	Anc_2.265	CAGL0G02805g		879	6.99659	0	0.99		YIL106W	MOB1	1030	0	0.955		0.035	inviable	Component of the mitotic exit network; associates with and is required for the activation and Cdc15p-dependent phosphorylation of the Dbf2p kinase; required for cytokinesis and cell separation; component of the CCR4 transcriptional complex; relocalizes from cytoplasm to the nuclear periphery upon DNA replication stress	.
	1-to-1	Anc_8.383	CAGL0F05753g		1467	0	0	0.99		YDR182W	CDC1	1476	0	0.96		0.03	inviable	Putative lipid phosphatase of the endoplasmic reticulum; shows Mn2+ dependence and may affect Ca2+ signaling; mutants display actin and general growth defects and pleiotropic defects in cell cycle progression and organelle distribution	.
	1-to-1	Anc_6.047	CAGL0K05973g	HSP60	1707	0	0	0.99		YLR259C	HSP60	1719	0	0.96		0.03	inviable	Tetradecameric mitochondrial chaperonin; required for ATP-dependent folding of precursor polypeptides and complex assembly; prevents aggregation and mediates protein refolding after heat shock; role in mtDNA transmission; phosphorylated	.
	1-to-1	Anc_2.136	CAGL0K09614g		3162	0	0	0.99		YNL132W	KRE33	3171	0	0.96		0.03	inviable	Protein required for biogenesis of the small ribosomal subunit; required for biogenesis of the small ribosomal subunit; heterozygous mutant shows haploinsufficiency in K1 killer toxin resistance; essential gene	.
	1-to-1	Anc_6.166	CAGL0J05346g		1434	0	0	0.99		YGL097W	SRM1	1449	0	0.96		0.03	inviable	Nucleotide exchange factor for Gsp1p; localizes to the nucleus, required for nucleocytoplasmic trafficking of macromolecules; suppressor of the pheromone response pathway; potentially phosphorylated by Cdc28p	.
	1-to-1	Anc_6.151	CAGL0F07491g		426	0	0	0.99		YGL106W	MLC1	450	0	0.965		0.025	inviable	Essential light chain for Myo1p; light chain for Myo2p; stabilizes Myo2p by binding to the neck region; interacts with Myo1p, Iqg1p, and Myo2p to coordinate formation and contraction of the actomyosin ring with targeted membrane deposition	.
	1-to-1	Anc_8.659	CAGL0M02409g		1344	0	0	0.99		YPL146C	NOP53	1368	0	0.965		0.025	inviable	Nucleolar protein; involved in biogenesis of the 60S subunit of the ribosome; interacts with rRNA processing factors Cbf5p and Nop2p; null mutant is viable but growth is severely impaired	.
	1-to-1	Anc_8.021	CAGL0F01595g		660	0.757576	0	0.99		YLR066W	SPC3	555	0	0.965		0.025	inviable	Subunit of signal peptidase complex; complex catalyzes cleavage of N-terminal signal sequences of proteins targeted to the secretory pathway; homologous to mammalian SPC22/23; other members of the complex are Spc1p, Spc2p, and Sec11p	.
	1-to-1	Anc_7.140	CAGL0L02365g		1287	0	0	0.99		YEL002C	WBP1	1293	0	0.965		0.025	inviable	Beta subunit of the oligosaccharyl transferase glycoprotein complex; required for N-linked glycosylation of proteins in the endoplasmic reticulum	.
	1-to-1	Anc_8.683	CAGL0J03652g		3282	0	0	0.99		YPL160W	CDC60	3273	0	0.97		0.02	inviable	Cytosolic leucyl tRNA synthetase; ligates leucine to the appropriate tRNA	.
	1-to-1	Anc_2.063	CAGL0J11440g		1632	0	0	0.99		YNL189W	SRP1	1629	0	0.97		0.02	inviable	Karyopherin alpha homolog; forms a dimer with karyopherin beta Kap95p to mediate import of nuclear proteins, binds the nuclear localization signal of the substrate during import; may also play a role in regulation of protein degradation	.
	1-to-1	Anc_6.225	CAGL0M05775g		546	0	0	0.99		YPL211W	NIP7	546	0	0.975		0.015	inviable	Nucleolar protein required for 60S ribosome subunit biogenesis; constituent of 66S pre-ribosomal particles; physically interacts with Nop8p and the exosome subunit Rrp43p	.
	1-to-1	Anc_3.423	CAGL0G01672g		1254	0	0	0.99		YPR108W	RPN7	1290	0	0.975		0.015	inviable	Essential non-ATPase regulatory subunit of the 26S proteasome; similar to another S. cerevisiae regulatory subunit, Rpn5p, as well as to mammalian proteasome subunits	.
	1-to-1	Anc_3.580	CAGL0A04807g		798	0	0	0.99		YFR052W	RPN12	825	0	0.98		0.01	inviable	Subunit of the 19S regulatory particle of the 26S proteasome lid; synthetically lethal with RPT1, which is an ATPase component of the 19S regulatory particle; physically interacts with Nob1p and Rpn3p; protein abundance increases in response to DNA replication stress	.
	1-to-1	Anc_7.314	CAGL0I03828g	RPB1	5148	2.58353	1.04895	0.99		YDL140C	RPO21	5202	0	0.98		0.01	inviable	RNA polymerase II largest subunit B220; part of central core; phosphorylation of C-terminal heptapeptide repeat domain regulates association with transcription and splicing factors; similar to bacterial beta-prime	.
	1-to-1	Anc_6.261	CAGL0H01001g		1431	0	0	0.99		YPL235W	RVB2	1416	0	0.98		0.01	inviable	ATP-dependent DNA helicase, also known as reptin; member of the AAA+ and RuvB protein families, similar to Rvb1p; conserved component of multiple complexes including the INO80 complex, the Swr1 complex, and the R2TP complex (Rvb1-Rvb2-Tah1-Pih1); involved in multiple processes such as chromatin remodeling, box C/D snoRNP assembly, and RNA polymerase II assembly	.
	1-to-1	Anc_3.442	CAGL0G07755g		2058	0	0	0.99		YGR099W	TEL2	2067	0	0.98		0.01	inviable	Subunit of the ASTRA complex, involved in chromatin remodeling; subunit of the telomere cap complex DNA-binding protein specific to single-stranded yeast telomeric DNA repeats, required for telomere length regulation and telomere position effect; involved in the stability or biogenesis of PIKKs such as TORC1	.
	1-to-1	Anc_3.183	CAGL0K01815g		1515	0	0	0.99		YDL017W	CDC7	1524	0	0.985		0.005	inviable	DDK (Dbf4-dependent kinase) catalytic subunit; required for origin firing and replication fork progression in mitotic S phase through phosphorylation of Mcm2-7p complexes and Cdc45p; kinase activity correlates with cyclical DBF4 expression; required for pre-meiotic DNA replication, meiotic DSB formation, recruitment of the monopolin complex to kinetochores during meiosis I and as a gene-specific …	.
	1-to-1	Anc_7.445	CAGL0K05313g		1554	0.19305	0	0.99		YPR033C	HTS1	1641	0	0.985		0.005	inviable	Cytoplasmic and mitochondrial histidine tRNA synthetase; efficient mitochondrial localization requires both a presequence and an amino-terminal sequence; mutations in human ortholog HARS2 are associated with Perrault syndrome	.
	1-to-1	Anc_7.547	CAGL0G10109g		2001	0	0	0.99		YPR190C	RPC82	1965	0	0.985		0.005	inviable	RNA polymerase III subunit C82	.
	1-to-1	Anc_3.361	CAGL0K12342g		1353	0.184775	0	0.99		YBR110W	ALG1	1350	0	0.99		0	inviable	Mannosyltransferase; involved in asparagine-linked glycosylation in the endoplasmic reticulum (ER); essential for viability, mutation is functionally complemented by human ortholog	.
	1-to-1	Anc_1.276	CAGL0L03410g		2196	0	0	0.99		YJL090C	DPB11	2295	0	0.99		0	inviable	DNA replication initiation protein; loads DNA pol epsilon onto pre-replication complexes at origins; checkpoint sensor recruited to stalled replication forks by the checkpoint clamp complex where it activates Mec1p; ortholog of human TopBP1; forms nuclear foci upon DNA replication stress	.
	1-to-1	Anc_8.769	CAGL0M04961g		1209	0	0	0.99		YMR235C	RNA1	1224	0	0.99		0	inviable	GTPase activating protein (GAP) for Gsp1p; involved in nuclear transport	.
	1-to-1	Anc_8.166	CAGL0J04378g		1656	0	0	0.99		YBL020W	RFT1	1725	0	0.995		-0.005	inviable	Membrane protein required for translocation of Man5GlcNac2-PP-Dol; required for translocation of Man5GlcNac2-PP-Dol from the cytoplasmic side to the lumenal side of the ER membrane but is not the flippase; mutation is suppressed by expression of human p53 protein; essential gene	.
	1-to-1	Anc_8.491	CAGL0L12672g		2049	3.70913	0	0.99		YPL043W	NOP4	2058	0	1		-0.01	inviable	Nucleolar protein; essential for processing and maturation of 27S pre-rRNA and large ribosomal subunit biogenesis; constituent of 66S pre-ribosomal particles; contains four RNA recognition motifs (RRMs)	.
	1-to-1	Anc_2.421	CAGL0D01914g		1008	0	0	0.99		YLR026C	SED5	1023	0	1		-0.01	inviable	cis-Golgi t-SNARE syntaxin; required for vesicular transport between the ER and the Golgi complex; binds at least 9 SNARE proteins	.
	1-to-1	Anc_5.549	CAGL0J10604g		444	0	0	0.985		YDR437W	GPI19	423	0	0.73		0.255	inviable	Subunit of GPI-GlcNAc transferase involved in synthesis of GlcNAc-PI; N-acetylglucosaminyl phosphatidylinositol (GlcNAc-PI) is the first intermediate in glycosylphosphatidylinositol (GPI) anchor synthesis; shares similarity with mammalian PIG-P	.
	1-to-1	Anc_1.295	CAGL0H02805g		3660	0	0	0.985		YJL074C	SMC3	3693	0	0.75		0.235	inviable	Subunit of the multiprotein cohesin complex; required for sister chromatid cohesion in mitotic cells; also required, with Rec8p, for cohesion and recombination during meiosis; phylogenetically conserved SMC chromosomal ATPase family member	.
	1-to-1	Anc_3.382	CAGL0K07854g		429	0	0	0.985		YPR082C	DIB1	432	0	0.762101		0.222899	inviable	17-kDa component of the U4/U6aU5 tri-snRNP; plays an essential role in pre-mRNA splicing, orthologue of hDIM1, the human U5-specific 15-kDa protein	.
	1-to-1	Anc_5.208	CAGL0D03124g		2178	0	0	0.985		YLL008W	DRS1	2259	0	0.81		0.175	inviable	Nucleolar DEAD-box protein required for ribosome assembly and function; including synthesis of 60S ribosomal subunits; constituent of 66S pre-ribosomal particles	.
	1-to-1	Anc_7.410	CAGL0G03465g		519	6.55106	0	0.985		YER112W	LSM4	564	0	0.81		0.175	inviable	Lsm (Like Sm) protein; part of heteroheptameric complexes (Lsm2p-7p and either Lsm1p or 8p): cytoplasmic Lsm1p complex involved in mRNA decay; nuclear Lsm8p complex part of U6 snRNP and possibly involved in processing tRNA, snoRNA, and rRNA; forms cytoplasmic foci upon DNA replication stress	.
	1-to-1	Anc_7.234	CAGL0L00715g		3435	0	0	0.985		YIL048W	NEO1	3456	0	0.825		0.16	inviable	Putative aminophospholipid translocase (flippase); involved in endocytosis and vacuolar biogenesis; localizes to endosomes and the Golgi aparatus	.
	1-to-1	Anc_2.495	CAGL0M10131g	MIF2	1629	0	0	0.985		YKL089W	MIF2	1650	0	0.84		0.145	inviable	Protein required for structural integrity of elongating spindles; localizes to the kinetochore; interacts with histones H2A, H2B, and H4; phosphorylated by Ipl1p; orthologous to human centromere constitutive-associated network (CCAN) subunit CENP-C and fission yeast cnp3	.
	1-to-1	Anc_2.566	CAGL0L01749g		1509	0	0	0.985		YKL045W	PRI2	1587	0	0.85		0.135	inviable	Subunit of DNA primase; DNA primase is required for DNA synthesis and double-strand break repair	.
	1-to-1	Anc_5.351	CAGL0J10824g		2202	0.635786	0	0.985		YHR072W	ERG7	2196	0	0.885		0.1	inviable	Lanosterol synthase; an essential enzyme that catalyzes the cyclization of squalene 2,3-epoxide, a step in ergosterol biosynthesis	.
	1-to-1	Anc_2.329	CAGL0E04972g		2016	0	0	0.985		YGL145W	TIP20	2106	0	0.9		0.085	inviable	Peripheral membrane protein required for COPI vesicle fusion to the ER; prohibits back-fusion of COPII vesicles with the ER; forms a tethering complex with Sec39p and Dsl1p that interacts with ER SNAREs Sec20p and Use1p	.
	1-to-1	Anc_2.650	CAGL0L05390g		516	0	0	0.985		YKL013C	ARC19	516	0	0.906244		0.0787558	inviable	Subunit of the ARP2/3 complex; ARP2/3 is required for the motility and integrity of cortical actin patches	.
	1-to-1	Anc_6.001	CAGL0L07678g		954	0	0	0.985		YPL266W	DIM1	957	0	0.91		0.075	inviable	Essential 18S rRNA dimethylase (dimethyladenosine transferase); responsible for conserved m6(2)Am6(2)A dimethylation in 3'-terminal loop of 18S rRNA, part of 90S and 40S pre-particles in nucleolus, involved in pre-ribosomal RNA processing	.
	1-to-1	Anc_7.459	CAGL0D03718g	TIF5	1218	0	0	0.985		YPR041W	TIF5	1218	0	0.91		0.075	inviable	Translation initiation factor eIF5; functions both as a GTPase-activating protein to mediate hydrolysis of ribosome-bound GTP and as a GDP dissociation inhibitor to prevent recycling of eIF2	.
	1-to-1	Anc_7.296	CAGL0J09218g	CDC53	2469	0	0	0.985		YDL132W	CDC53	2448	0	0.92		0.065	inviable	Cullin; structural protein of SCF complexes (which also contain Skp1p, Cdc34p, Hrt1p and an F-box protein) involved in ubiquitination; SCF promotes the G1-S transition by targeting G1 cyclins and the Cln-CDK inhibitor Sic1p for degradation	.
	1-to-1	Anc_3.069	CAGL0M03575g		996	0	0	0.985		YNL290W	RFC3	1023	0	0.92		0.065	inviable	Subunit of heteropentameric Replication factor C (RF-C); which is a DNA binding protein and ATPase that acts as a clamp loader of the proliferating cell nuclear antigen (PCNA) processivity factor for DNA polymerases delta and epsilon; relocalizes to the cytosol in response to hypoxia	.
	1-to-1	Anc_5.458	CAGL0A03117g		1996	1.52806	0	0.985		YDR381W	YRA1	1447	0	0.92		0.065	inviable	Nuclear polyadenylated RNA-binding protein; required for export of poly(A)+ mRNA from the nucleus; proposed to couple mRNA export with 3' end processing via its interactions with Mex67p and Pcf11p; interacts with DBP2; inhibits the helicase activity of Dbp2; functionally redundant with Yra2p, another REF family member	.
	1-to-1	Anc_5.026	CAGL0M13673g		435	0	0	0.985		YMR298W	LIP1	453	0	0.921208		0.0637916	inviable	Ceramide synthase subunit; single-span ER membrane protein associated with Lag1p and Lac1p and required for ceramide synthase activity, null mutant grows extremely slowly and is defective in ceramide synthesis	.
	1-to-1	Anc_5.049	CAGL0M13409g		4632	0	0	0.985		YHR186C	KOG1	4674	0	0.925		0.06	inviable	Subunit of TORC1; TORC1 is a rapamycin-sensitive complex involved in growth control that contains Tor1p or Tor2p, Lst8p and Tco89p; contains four HEAT repeats and seven WD-40 repeats; may act as a scaffold protein to couple TOR and its effectors	.
	1-to-1	Anc_5.490	CAGL0F02541g		1893	0	0	0.985		YDR398W	UTP5	1932	0	0.93		0.055	inviable	Subunit of U3-containing Small Subunit (SSU) processome complex; involved in production of 18S rRNA and assembly of small ribosomal subunit	.
	1-to-1	Anc_1.099	CAGL0J07964g		2238	0	0	0.985		YNL258C	DSL1	2265	0	0.935		0.05	inviable	Peripheral membrane protein needed for Golgi-to-ER retrograde traffic; forms a complex with Sec39p and Tip20p that interacts with ER SNAREs Sec20p and Use1p; component of the ER target site that interacts with coatomer; interacts with Cin5p; similar to the fly and human ZW10 gene	.
	1-to-1	Anc_1.287	CAGL0M03201g		1482	0.0337382	0	0.985		YJL081C	ARP4	1470	0	0.943106		0.0418942	inviable	Nuclear actin-related protein involved in chromatin remodeling; component of chromatin-remodeling enzyme complexes	.
	1-to-1	Anc_7.155	CAGL0H09658g		378	0	0	0.985		YER009W	NTF2	378	0	0.943106		0.0418942	inviable	Nuclear envelope protein; interacts with GDP-bound Gsp1p and with proteins of the nuclear pore to transport Gsp1p into the nucleus where it is an essential player in nucleocytoplasmic transport	.
	1-to-1	Anc_2.563	CAGL0L01793g		1080	0.0925926	0	0.985		YKL042W	SPC42	1092	0	0.943106		0.0418942	inviable	Central plaque component of spindle pole body (SPB); involved in SPB duplication, may facilitate attachment of the SPB to the nuclear membrane	.
	1-to-1	Anc_1.467	CAGL0I01606g		3474	0	0	0.985		YJR041C	URB2	3525	0	0.945		0.04	inviable	Protein required for normal metabolism of the rRNA primary transcript; nucleolar protein; proposed to be involved in ribosome biogenesis	.
	1-to-1	Anc_7.180	CAGL0L09647g		1290	0	0	0.985		YIR012W	SQT1	1296	0	0.95		0.035	inviable	Protein involved in 60S ribosomal subunit assembly or modification; contains multiple WD repeats; interacts with Qsr1p in a two-hybrid assay; protein abundance increases in response to DNA replication stress	.
	1-to-1	Anc_7.059	CAGL0M11836g		534	0	0	0.985		YAL033W	POP5	522	0	0.955		0.03	inviable	Subunit of both RNase MRP and nuclear RNase P; RNase MRP cleaves pre-rRNA, while nuclear RNase P cleaves tRNA precursors to generate mature 5' ends and facilitates turnover of nuclear RNAs	.
	1-to-1	Anc_4.326	CAGL0L11242g	TEM1	765	0	0	0.985		YML064C	TEM1	738	0	0.955		0.03	inviable	GTP-binding protein of the Ras superfamily; involved in termination of M-phase; controls actomyosin and septin dynamics during cytokinesis	.
	1-to-1	Anc_8.527	CAGL0H05159g		1458	0	0	0.985		YPL063W	TIM50	1431	0	0.955		0.03	inviable	Essential component of the TIM23 complex; acts as receptor for the translocase of the inner mitochondrial membrane (TIM23) complex guiding incoming precursors from the TOM complex; may control the gating of the Tim23p-Tim17p channel	.
	1-to-1	Anc_8.376	CAGL0H02739g	MAS1	1398	0	0	0.985		YLR163C	MAS1	1389	0	0.96		0.025	inviable	Smaller subunit of the mitochondrial processing protease (MPP); essential processing enzyme that cleaves the N-terminal targeting sequences from mitochondrially imported proteins	.
	1-to-1	Anc_5.177	CAGL0I08701g		744	0	0	0.985		YGR172C	YIP1	747	0	0.96		0.025	inviable	Integral membrane protein; required for the biogenesis of ER-derived COPII transport vesicles; interacts with Yif1p and Yos1p; localizes to the Golgi, the ER, and COPII vesicles; homolog of human YIPF4	.
	1-to-1	Anc_8.531	CAGL0M05423g		2439	0.0820008	0	0.985		YBR202W	MCM7	2538	0	0.965		0.02	inviable	Component of the Mcm2-7 hexameric helicase complex; MCM2-7 primes origins of DNA replication in G1 and becomes an active ATP-dependent helicase that promotes DNA melting and elongation in S-phase; forms an Mcm4p-6p-7p subcomplex	.
	1-to-1	Anc_8.179	CAGL0G05027g		1290	0	0	0.985		YDR064W	RPS13	995	0	0.965		0.02	inviable	Protein component of the small (40S) ribosomal subunit; homologous to mammalian ribosomal protein S13 and bacterial S15	.
	1-to-1	Anc_5.241	CAGL0J01045g		2298	0	0	0.985		YJL033W	HCA4	2313	0	0.97		0.015	inviable	DEAD box RNA helicase; high-copy number suppression of a U14 snoRNA processing mutant suggests an involvement in 18S rRNA synthesis	.
	1-to-1	Anc_3.038	CAGL0E01617g		2412	1.90713	0	0.985		YOL130W	ALR1	2580	0	0.975		0.01	inviable	Plasma membrane Mg(2+) transporter; expression and turnover are regulated by Mg(2+) concentration; overexpression confers increased tolerance to Al(3+) and Ga(3+) ions	.
	1-to-1	Anc_2.096	CAGL0J06072g	CBK1	2322	0.710594	0	0.985		YNL161W	CBK1	2271	0	0.975		0.01	inviable	Serine/threonine protein kinase of the the RAM signaling network; Ndr/LATS family member; binds regulatory subunit Mob2p; involved in regulation of cellular morphogenesis, polarized growth, and septum destruction; phosphorylation by Cbk1p regulates localization and activity of Ace2p transcription factor and Ssd1p translational repressor; Cbk1p activity is regulated by both phosphorylation and spe…	.
	1-to-1	Anc_5.696	CAGL0D02684g		2121	0	0	0.985		YIL144W	NDC80	2076	0	0.975		0.01	inviable	Component of the kinetochore-associated Ndc80 complex; conserved coiled-coil protein involved in chromosome segregation, spindle checkpoint activity, and kinetochore assembly and clustering; evolutionarily conserved; other members include Ndc80p, Nuf2p, Scp24p, and Spc25p	.
	1-to-1	Anc_8.420	CAGL0C01221g		2154	0	0	0.985		YDR211W	GCD6	2139	0	0.98		0.005	inviable	Catalytic epsilon subunit of the translation initiation factor eIF2B; eIF2B is the guanine-nucleotide exchange factor for eIF2; activity subsequently regulated by phosphorylated eIF2; first identified as a negative regulator of GCN4 expression; forms cytoplasmic foci upon DNA replication stress	.
	1-to-1	Anc_2.073	CAGL0J11286g		1587	1.70132	0	0.985		YNL182C	IPI3	1668	0	0.98		0.005	inviable	Component of the Rix1 complex and pre-replicative complexes (pre-RCs); required for processing of ITS2 sequences from 35S pre-rRNA; component of the pre-60S ribosomal particle with the dynein-related AAA-type ATPase Mdn1p; required for pre-RC formation and maintenance during DNA replication licensing; highly conserved protein which contains several WD40 motifs; IPI3 is an essential gene; other me…	.
	1-to-1	Anc_7.330	CAGL0I03608g		1788	0	0	0.985		YDL153C	SAS10	1833	0	0.98		0.005	inviable	Subunit of U3-containing Small Subunit (SSU) processome complex; involved in production of 18S rRNA and assembly of small ribosomal subunit; disrupts silencing when overproduced; mutant has increased aneuploidy tolerance; essential gene	.
	1-to-1	Anc_8.462	CAGL0K11088g		2919	0	0	0.985		YDR238C	SEC26	2922	0	0.98		0.005	inviable	Essential beta-coat protein of the COPI coatomer; involved in ER-to-Golgi protein trafficking and maintenance of normal ER morphology; shares 43% sequence identity with mammalian beta-coat protein (beta-COP)	.
	1-to-1	Anc_2.271	CAGL0G02783g		1473	0.984386	0	0.985		YIL104C	SHQ1	1524	0	0.98		0.005	inviable	Chaperone protein; required for the assembly of box H/ACA snoRNPs and thus for pre-rRNA processing, forms a complex with Naf1p and interacts with H/ACA snoRNP components Nhp2p and Cbf5p; homology with known Hsp90p cochaperones; relocalizes to the cytosol in response to hypoxia	.
	1-to-1	Anc_8.113	CAGL0J01848g		3609	0	0	0.985		YPR010C	RPA135	3612	0	0.985		0	inviable	RNA polymerase I second largest subunit A135	.
	1-to-1	Anc_8.052	CAGL0K07656g	FRS2	1494	0	0	0.985		YFL022C	FRS2	1512	0	0.99		-0.005	inviable	Alpha subunit of cytoplasmic phenylalanyl-tRNA synthetase; forms a tetramer with Frs1p to form active enzyme; evolutionarily distant from mitochondrial phenylalanyl-tRNA synthetase based on protein sequence, but substrate binding is similar	.
	1-to-1	Anc_5.503	CAGL0L04356g		2892	0.0691563	0	0.985		YOR160W	MTR10	2919	0	0.99		-0.005	inviable	Nuclear import receptor; mediates the nuclear localization of proteins involved in mRNA-nucleus export; promotes dissociation of mRNAs from the nucleus-cytoplasm mRNA shuttling protein Npl3p; required for retrograde import of mature tRNAs; relocalizes from cytoplasm to the nuclear periphery upon DNA replication stress	.
	1-to-1	Anc_8.812	CAGL0H02409g		462	0	0	0.985		YMR260C	TIF11	462	0	0.99		-0.005	inviable	Translation initiation factor eIF1A; essential protein that forms a complex with Sui1p (eIF1) and the 40S ribosomal subunit and scans for the start codon; C-terminus associates with Fun12p (eIF5B); N terminus interacts with eIF2 and eIF3	.
	1-to-1	Anc_4.028	CAGL0G04015g		3060	2.36928	0	0.985		YLL031C	GPI13	3054	0	1		-0.015	inviable	ER membrane localized phosphoryltransferase; adds phosphoethanolamine onto the third mannose residue of the glycosylphosphatidylinositol (GPI) anchor precursor; similar to human PIG-O protein	.
	1-to-1	Anc_6.239	CAGL0H08932g		3112	0	0	0.985		YGL137W	SEC27	2870	0	1		-0.015	inviable	Essential beta'-coat protein of the COPI coatomer; involved in ER-to-Golgi and Golgi-to-ER transport; contains WD40 domains that mediate cargo selective interactions; 45% sequence identity to mammalian beta'-COP	.
	1-to-1	Anc_8.381	CAGL0F05797g		4413	0.0226603	0	0.984401		YDR180W	SCC2	4482	0	0.984464		-6.36727e-05	inviable	Subunit of cohesin loading factor (Scc2p-Scc4p); a complex required for loading of cohesin complexes onto chromosomes; involved in establishing sister chromatid cohesion during DSB repair via histone H2AX; evolutionarily-conserved adherin; relocalizes to the cytosol in response to hypoxia	.
	1-to-1	Anc_5.607	CAGL0H08283g	HSP10	321	1.24611	0	0.982857		YOR020C	HSP10	321	0	0.915		0.0678573	inviable	Mitochondrial matrix co-chaperonin; inhibits the ATPase activity of Hsp60p, a mitochondrial chaperonin; involved in protein folding and sorting in the mitochondria; 10 kD heat shock protein with similarity to E. coli groES	.
	1-to-1	Anc_3.249	CAGL0M06567g		1200	0	0	0.982857		YDR021W	FAL1	1200	0	0.943106		0.0397514	inviable	Nucleolar protein required for maturation of 18S rRNA; member of the eIF4A subfamily of DEAD-box ATP-dependent RNA helicases	.
	1-to-1	Anc_4.333	CAGL0L11352g		1632	0	0	0.982857		YML069W	POB3	1659	0	0.943106		0.0397514	inviable	Subunit of the heterodimeric FACT complex (Spt16p-Pob3p); FACT associates with chromatin via interaction with Nhp6Ap and Nhp6Bp, and reorganizes nucleosomes to facilitate access to DNA by RNA and DNA polymerases; protein abundance increases in response to DNA replication stress	.
	1-to-1	Anc_8.025	CAGL0K12672g		621	0	0	0.982857		YFL038C	YPT1	621	0	0.945		0.0378573	inviable	Rab family GTPase; involved in the ER-to-Golgi step of the secretory pathway; complex formation with the Rab escort protein Mrs6p is required for prenylation of Ypt1p by protein geranylgeranyltransferase type II (Bet2p-Bet4p)	.
	1-to-1	Anc_1.305	CAGL0H02937g		1833	0	0	0.982857		YJL069C	UTP18	1785	0	0.96		0.0228573	inviable	Small-subunit processome protein involved in pre-18S rRNA maturation; part of a subunit of the 90S preribosomal particle capable of interacting directly with the 5' ETS of the 35S pre-rRNA; contains WD40 repeats	.
	1-to-1	Anc_5.679	CAGL0K05489g		1023	0	0	0.982857		YOR075W	UFE1	1041	0	0.98		0.00285727	inviable	t-SNARE protein required for retrograde vesicular traffic; also required for homotypic ER membrane fusion; forms a complex with the SNAREs Sec22p, Sec20p and Use1p to mediate fusion of Golgi-derived vesicles at the ER	.
	1-to-1	Anc_2.426	CAGL0D02018g		213	0	0	0.982857		YKL138C-A	HSK3	210	0	1		-0.0171427	inviable	Essential subunit of the Dam1 complex (aka DASH complex); complex couples kinetochores to the force produced by MT depolymerization thereby aiding in chromosome segregation; is transferred to the kinetochore prior to mitosis	.
	1-to-1	Anc_3.288	CAGL0H08327g	TPI1	747	0	0	0.98		YDR050C	TPI1	747	0	0.53		0.45	inviable	Triose phosphate isomerase, abundant glycolytic enzyme; mRNA half-life is regulated by iron availability; transcription is controlled by activators Reb1p, Gcr1p, and Rap1p through binding sites in the 5' non-coding region; inhibition of Tpi1p activity by PEP (phosphoenolpyruvate) stimulates redox metabolism in respiring cells; E104D mutation in human TPI causes a rare autosomal disease	.
	1-to-1	Anc_1.088	CAGL0A03630g		3189	1.75604	0	0.98		YGR047C	TFC4	3078	0	0.675		0.305	inviable	Subunit of RNA polymerase III transcription initiation factor complex; one of six subunits of RNA polymerase III transcription initiation factor complex (TFIIIC); part of the TauA domain of TFIIIC that binds BoxA DNA promoter sites of tRNA and similar genes; has TPR motifs; human homolog is TFIIIC-102	.
	1-to-1	Anc_1.475	CAGL0I01474g		1782	0	0	0.98		YJR046W	TAH11	1815	0	0.75		0.23	inviable	DNA replication licensing factor; required for pre-replication complex assembly	.
	1-to-1	Anc_7.318	CAGL0J08932g		1068	0	0	0.98		YLR215C	CDC123	1083	0	0.78		0.2	inviable	Protein involved in nutritional control of the cell cycle; regulates abundance of the translation initiation factor eIF2; ortholog of human D123 protein	.
	1-to-1	Anc_8.735	CAGL0F03949g		3291	0.622911	0	0.98		YMR218C	TRS130	3309	0	0.795		0.185	inviable	One of 10 subunits of the transport protein particle (TRAPP) complex; the TRAPP complex is of the cis-Golgi and mediates vesicle docking and fusion; involved in endoplasmic reticulum (ER) to Golgi membrane traffic; mutation activates transcription of OCH1; mutants are defective in cytoplasm-to-vacuole targeting (Cvt) pathway and starvation-induced autophagy	.
	1-to-1	Anc_5.489	CAGL0M01474g		435	5.17241	0	0.98		YDR397C	NCB2	533	0	0.83		0.15	inviable	Subunit of a heterodimeric NC2 transcription regulator complex; complex binds to TBP and can repress transcription by preventing preinitiation complex assembly or stimulate activated transcription; homologous to human NC2beta; complex also includes Bur6p	.
	1-to-1	Anc_3.489	CAGL0I10560g		2037	0	0	0.98		YGR128C	UTP8	2142	0	0.83		0.15	inviable	Nucleolar protein required for export of tRNAs from the nucleus; also copurifies with the small subunit (SSU) processome containing the U3 snoRNA that is involved in processing of pre-18S rRNA	.
	1-to-1	Anc_4.362	CAGL0M07227g		1629	0	0	0.98		YHR196W	UTP9	1728	0	0.83		0.15	inviable	Nucleolar protein; component of the small subunit (SSU) processome containing the U3 snoRNA that is involved in processing of pre-18S rRNA	.
	1-to-1	Anc_2.163	CAGL0L03872g		414	0	0	0.98		YNL113W	RPC19	429	0	0.86		0.12	inviable	RNA polymerase subunit AC19; common to RNA polymerases I and III	.
	1-to-1	Anc_2.653	CAGL0L09669g		5037	0	0	0.98		YKL014C	URB1	5295	0	0.865		0.115	inviable	Protein required for the normal accumulation of 25S and 5.8S rRNAs; nucleolar protein; associated with the 27SA2 pre-ribosomal particle; proposed to be involved in the biogenesis of the 60S ribosomal subunit	.
	1-to-1	Anc_3.303	CAGL0M01804g		2856	1.92577	0	0.98		YBR079C	RPG1	2895	0	0.885		0.095	inviable	eIF3a subunit of the eukaryotic translation initiation factor 3 (eIF3); subunit of the core complex of eIF3; essential for translation; part of a Prt1p-Rpg1p-Nip1p subcomplex that stimulates binding of mRNA and tRNA(i)Met to ribosomes; involved in translation reinitiation	.
	1-to-1	Anc_3.401	CAGL0C00473g		7140	0.0840336	0	0.98		YBR136W	MEC1	7107	0	0.9		0.08	inviable	Genome integrity checkpoint protein and PI kinase superfamily member; Mec1p and Dun1p function in same pathway to regulate both dNTP pools and telomere length; signal transducer required for cell cycle arrest and transcriptional responses prompted by damaged or unreplicated DNA; regulates P-body formation induced by replication stress; monitors and participates in meiotic recombination; associate…	.
	1-to-1	Anc_8.871	CAGL0H07007g		753	0	0	0.98		YML092C	PRE8	753	0	0.906244		0.0737558	inviable	Alpha 2 subunit of the 20S proteasome	.
	1-to-1	Anc_5.574	CAGL0G07359g		1836	3.7037	0	0.98		YML031W	NDC1	1968	0	0.915		0.065	inviable	Subunit of the transmembrane ring of the nuclear pore complex (NPC); contributes to nucleocytoplasmic transport, NPC biogenesis and spindle pole body duplication; homologous to human NDC1	.
	1-to-1	Anc_2.482	CAGL0F07645g		756	2.38095	0	0.98		YKL099C	UTP11	753	0	0.915		0.065	inviable	Subunit of U3-containing Small Subunit (SSU) processome complex; involved in production of 18S rRNA and assembly of small ribosomal subunit	.
	1-to-1	Anc_8.295	CAGL0M11616g		14643	0.0136584	0	0.98		YLR106C	MDN1	14733	0	0.92		0.06	inviable	Huge dynein-related AAA-type ATPase (midasin); forms extended pre-60S particle with the Rix1 complex (Rix1p-Ipi1p-Ipi3p); acts in removal of ribosomal biogenesis factors at successive steps of pre-60S assembly and export from nucleus	.
	1-to-1	Anc_3.428	CAGL0B04125g		1005	0	0	0.98		YPR110C	RPC40	1008	0	0.921208		0.0587916	inviable	RNA polymerase subunit AC40; common to RNA polymerase I and III	.
	1-to-1	Anc_6.380	CAGL0C03369g		2058	0.0485909	0	0.98		YNR053C	NOG2	1993	0	0.9295		0.0505	inviable	Putative GTPase; associates with pre-60S ribosomal subunits in the nucleolus and is required for their nuclear export and maturation	.
	1-to-1	Anc_2.074	CAGL0J11264g		1230	1.34146	0	0.98		YNL181W		1224	0	0.93		0.05	inviable	Putative oxidoreductase; required for cell viability	.
	1-to-1	Anc_2.292	CAGL0D04180g		2103	0.0951022	0	0.98		YIL091C	UTP25	2166	0	0.94		0.04	inviable	Nucleolar protein; required for 35S pre-RNA processing and 40S ribosomal subunit biogenesis	.
	1-to-1	Anc_5.506	CAGL0F02739g		3777	0	0	0.98		YDR407C	TRS120	3870	0	0.955		0.025	inviable	One of 10 subunits of the transport protein particle (TRAPP) complex; the TRAPP complex is of the cis-Golgi and mediates vesicle docking and fusion; involved in endoplasmic reticulum (ER) to Golgi membrane traffic	.
	1-to-1	Anc_7.032	CAGL0M11968g		2523	0	0	0.98		YAL041W	CDC24	2565	0	0.96		0.02	inviable	Guanine nucleotide exchange factor for Cdc42p; also known as a GEF or GDP-release factor; required for polarity establishment and maintenance, and mutants have morphological defects in bud formation and shmooing; relocalizes from nucleus to cytoplasm upon DNA replication stress	.
	1-to-1	Anc_2.076	CAGL0J11220g		744	0	0	0.98		YNL178W	RPS3	723	0	0.965		0.015	inviable	Protein component of the small (40S) ribosomal subunit; has apurinic/apyrimidinic (AP) endonuclease activity; essential for viability; homologous to mammalian ribosomal protein S3 and bacterial S3	.
	1-to-1	Anc_8.626	CAGL0M02805g		2619	0	0	0.98		YPL126W	NAN1	2691	0	0.97		0.01	inviable	U3 snoRNP protein; component of the small (ribosomal) subunit (SSU) processosome containing U3 snoRNA; required for the biogenesis of18S rRNA	.
	1-to-1	Anc_5.366	CAGL0M01430g		2256	0.132979	0	0.98		YDR324C	UTP4	2331	0	0.97		0.01	inviable	Subunit of U3-containing 90S preribosome and SSU processome complexes; involved in production of 18S rRNA and assembly of small ribosomal subunit; member of t-Utp subcomplex involved with transcription of 35S rRNA transcript; Small Subunit processome is also known as SSU processome	.
	1-to-1	Anc_6.132	CAGL0F07139g		2307	0	0	0.98		YGL120C	PRP43	2304	0	0.975		0.005	inviable	RNA helicase in the DEAH-box family; functions in both RNA polymerase I and polymerase II transcript metabolism; catalyzes removal of U2, U5, and U6 snRNPs from the postsplicing lariat-intron ribonucleoprotein complex; required for efficient biogenesis of both small- and large-subunit rRNAs; acts with Sqs1p to promote 20S to 18S rRNA processing catalyzed by endonuclease Nob1p	.
	1-to-1	Anc_6.351	CAGL0G07909g		972	0	0	0.98		YNR035C	ARC35	1029	0	0.98		0	inviable	Subunit of the ARP2/3 complex; ARP2/3 is required for the motility and integrity of cortical actin patches; required for cortical localization of calmodulin	.
	1-to-1	Anc_5.432	CAGL0L11594g		1524	6.69291	0	0.98		YOR119C	RIO1	1455	0	0.985		-0.005	inviable	Serine kinase involved in cell cycling and pre-rRNA processing; involved in cell cycle progression and processing of the 20S pre-rRNA into mature 18S rRNA; essential gene	.
	1-to-1	Anc_4.023	CAGL0D02838g		2505	0	0	0.98		YLL034C	RIX7	2514	0	0.986625		-0.006625	inviable	Putative ATPase of the AAA family; required for export of pre-ribosomal large subunits from the nucleus; distributed between the nucleolus, nucleoplasm, and nuclear periphery depending on growth conditions	.
	1-to-1	Anc_6.158	CAGL0C01727g		1344	0.446429	0	0.98		YBR243C	ALG7	1347	0	0.99		-0.01	inviable	UDP-N-acetyl-glucosamine-1-P transferase; transfers Glc-Nac-P from UDP-GlcNac to Dol-P in the ER in the first step of the dolichol pathway of protein asparagine-linked glycosylation; inhibited by tunicamycin	.
	1-to-1	Anc_5.487	CAGL0K09548g		1491	0	0	0.98		YOR149C	SMP3	1551	0	0.99		-0.01	inviable	Alpha 1,2-mannosyltransferase; involved in glycosyl phosphatidyl inositol (GPI) biosynthesis; required for addition of the fourth, side branching mannose to the GPI core structure	.
	1-to-1	Anc_5.260	CAGL0J00781g		2601	0	0	0.98		YJL041W	NSP1	2590	4.16988	0.995		-0.015	inviable	FG-nucleoporin component of central core of the nuclear pore complex; also part of the nuclear pore complex (NPC) nuclear basket; contributes directly to nucleocytoplasmic transport and maintenance of the NPC permeability barrier; found in stable complex with Nup82p, Gle2p and two other FG-nucleoporins (Nup159p and Nup116p); also found in stable complex with Nic96p and two other FG-nucleoproteins…	.
	1-to-1	Anc_3.436	CAGL0G03157g		660	0	0	0.98		YPR113W	PIS1	663	0	0.995		-0.015	inviable	Phosphatidylinositol synthase; required for biosynthesis of phosphatidylinositol, which is a precursor for polyphosphoinositides, sphingolipids, and glycolipid anchors for some of the plasma membrane proteins	.
	1-to-1	Anc_3.441	CAGL0G03223g		4815	0.166147	0	0.98		YGR098C	ESP1	4893	0	1		-0.02	inviable	Separase, a caspase-like cysteine protease; promotes sister chromatid separation by mediating dissociation of the cohesin Scc1p from chromatin; inhibits protein phosphatase 2A-Cdc55p to promote mitotic exit; inhibited by Pds1p; relative distribution to the nucleus increases upon DNA replication stress	.
	1-to-1	Anc_8.177	CAGL0G05071g		1698	0	0	0.98		YDR062W	LCB2	1686	0	1		-0.02	inviable	Component of serine palmitoyltransferase; responsible along with Lcb1p for the first committed step in sphingolipid synthesis, which is the condensation of serine with palmitoyl-CoA to form 3-ketosphinganine	.
	1-to-1	Anc_6.068	CAGL0C03135g		3474	0	0	0.98		YLR272C	YCS4	3531	0	1		-0.02	inviable	Subunit of the condensin complex; required for establishment and maintenance of chromosome condensation, chromosome segregation, chromatin binding of condensin, tRNA gene clustering at the nucleolus, and silencing at the mating type locus; required for replication slow zone (RSZ) breakage following Mec1p inactivation	.
	1-to-1	Anc_5.354	CAGL0H07073g		222	0	0	0.975		YDR320C-A	DAD4	219	0	0.51		0.465	inviable	Essential subunit of the Dam1 complex (aka DASH complex); complex couples kinetochores to the force produced by MT depolymerization thereby aiding in chromosome segregation; is transferred to the kinetochore prior to mitosis	.
	1-to-1	Anc_3.185	CAGL0K01859g		972	0	0	0.975		YDL014W	NOP1	984	0	0.605		0.37	inviable	Nucleolar protein; component of the small subunit processome complex, which is required for processing of pre-18S rRNA; has similarity to mammalian fibrillarin	.
	1-to-1	Anc_7.020	CAGL0H06105g		873	0	0	0.975		YOR362C	PRE10	867	0	0.625		0.35	inviable	Alpha 7 subunit of the 20S proteasome; protein abundance increases in response to DNA replication stress	.
	1-to-1	Anc_7.312	CAGL0I03850g		609	0	0	0.975		YDL139C	SCM3	672	0	0.625		0.35	inviable	Nonhistone component of centromeric chromatin; binds to histone H3 variant, Cse4p, and recruits it to centromeres; involved in the assembly and maintenance of Cse4-H4 at centromeres; required for kinetochore assembly and G2/M progression; may protect Cse4p from ubiquitylation; homolog of mammalian HJURP	.
	1-to-1	Anc_2.111	CAGL0J05896g		576	0.173611	0	0.975		YNL158W	PGA1	597	0	0.73		0.245	inviable	Essential component of GPI-mannosyltransferase II; complex is responsible for second mannose addition to GPI precursors as a partner of Gpi18p; required for maturation of Gas1p and Pho8p; has synthetic genetic interactions with secretory pathway genes	.
	1-to-1	Anc_7.008	CAGL0G03729g		1785	0	0	0.975		YOR372C	NDD1	1665	0	0.765		0.21	inviable	Transcriptional activator essential for nuclear division; localized to the nucleus; essential component of the mechanism that activates the expression of a set of late-S-phase-specific genes	.
	1-to-1	Anc_5.392	CAGL0M01056g		570	0	0	0.975		YDR339C	FCF1	570	0	0.792237		0.182763	inviable	Putative PINc domain nuclease; required for early cleavages of 35S pre-rRNA and maturation of 18S rRNA; component of the SSU (small subunit) processome involved in 40S ribosomal subunit biogenesis; copurifies with Faf1p	.
	1-to-1	Anc_2.253	CAGL0C01265g	GLM4	4506	7.66755	0.310697	0.975		YIL115C	NUP159	4383	0	0.845		0.13	inviable	FG-nucleoporin component of central core of the nuclear pore complex; also part of the nuclear pore complex (NPC) cytoplasmic filaments; contributes directly to nucleocytoplasmic transport; regulates ADP release from the ATP-dependent RNA helicase Dbp5p; forms a stable association with Nup82p, Gle2p and two other FG-nucleoporins (Nsp1p and Nup116p)	.
	1-to-1	Anc_4.137	CAGL0F08613g		1599	0	0	0.975		YGR002C	SWC4	1431	0	0.845		0.13	inviable	Component of the Swr1p complex that incorporates Htz1p into chromatin; component of the NuA4 histone acetyltransferase complex	.
	1-to-1	Anc_7.424	CAGL0H04521g		396	0	0	0.975		YBL092W	RPL32	726	0	0.85		0.125	inviable	Ribosomal 60S subunit protein L32; overexpression disrupts telomeric silencing; homologous to mammalian ribosomal protein L32, no bacterial homolog	.
	1-to-1	Anc_4.301	CAGL0J04708g		1893	0.660328	0	0.975		YLR424W	SPP382	2127	0	0.87		0.105	inviable	Essential protein that forms a dimer with Ntr2p; also forms a trimer, with Ntr2p and Prp43p, that is involved in spliceosome disassembly; found also in a multisubunit complex with the splicing factor Clf1p; suppressor of prp38-1 mutation	.
	1-to-1	Anc_7.053	CAGL0M11924g		777	0.1287	0	0.975		YAL034W-A	MTW1	870	0	0.88		0.095	inviable	Essential component of the MIND kinetochore complex; joins kinetochore subunits contacting DNA to those contacting microtubules; critical to kinetochore assembly; complex consists of Mtw1p Including Nnf1p-Nsl1p-Dsn1p (MIND)	.
	1-to-1	Anc_3.032	CAGL0E01573g		2715	0.0736648	0	0.975		YNL313C	EMW1	2715	0	0.895		0.08	inviable	Essential conserved protein with a role in cell wall integrity; contains six TPR (tetratricopeptide repeat) domains clustered in the C-terminal region; conditional mutant is suppressed by overexpression of GFA1; protein abundance increases in response to DNA replication stress	.
	1-to-1	Anc_6.031	CAGL0J11638g		2241	0	0	0.975		YMR001C	CDC5	2118	0	0.905		0.07	inviable	Polo-like kinase with multiple functions in mitosis and cytokinesis; regulates Spc72p; also functions in adaptation to DNA damage during meiosis; has similarity to Xenopus Plx1 and S. pombe Plo1p; possible Cdc28p substrate	.
	1-to-1	Anc_2.064	CAGL0J11418g		1041	0	0	0.975		YNL188W	KAR1	1302	0	0.905		0.07	inviable	Protein involved in karyogamy and spindle pole body duplication; involved in karyogamy during mating; involved in spindle pole body duplication during mitosis; localizes to the half-bridge of the spindle pole body; interacts with Spc72p during karyogamy; also interacts with Cdc31p; essential gene	.
	1-to-1	Anc_7.540	CAGL0G09955g		798	1.12782	0	0.975		YPR183W	DPM1	804	0	0.906244		0.0687558	inviable	Dolichol phosphate mannose (Dol-P-Man) synthase of the ER membrane; catalyzes the formation of Dol-P-Man from Dol-P and GDP-Man; required for glycosyl phosphatidylinositol membrane anchoring, O mannosylation, and protein glycosylation	.
	1-to-1	Anc_8.313	CAGL0B01551g		5091	0	0	0.975		YDR141C	DOP1	5097	0	0.91		0.065	inviable	Golgi-localized, leucine-zipper domain containing protein; involved in endosome to Golgi transport, organization of the ER, establishing cell polarity, and morphogenesis; detected in highly purified mitochondria in high-throughput studies	.
	1-to-1	Anc_8.703	CAGL0F03597g		1498	0	0	0.975		YPL175W	SPT14	1459	0	0.921208		0.0537916	inviable	UDP-glycosyltransferase subunit of the GPI-GnT complex; UDP-GlcNAc-binding and catalytic subunit of the enzyme that mediates the first step in glycosylphosphatidylinositol (GPI) biosynthesis, mutations cause defects in transcription and in biogenesis of cell wall proteins	.
	1-to-1	Anc_6.264	CAGL0H00957g		747	0	0	0.975		YPL237W	SUI3	858	0	0.921208		0.0537916	inviable	Beta subunit of the translation initiation factor eIF2; involved in the identification of the start codon; proposed to be involved in mRNA binding	.
	1-to-1	Anc_1.531	CAGL0F00275g		1215	0	0	0.975		YJR076C	CDC11	1248	0	0.925		0.05	inviable	Component of the septin ring that is required for cytokinesis; septins are GTP-binding proteins that assemble into rod-like hetero-oligomers that can associate with other rods to form filaments; septin rings at the mother-bud neck act as scaffolds for recruiting cell division factors and as barriers to prevent diffusion of specific proteins between mother and daughter cells	.
	1-to-1	Anc_8.070	CAGL0F02123g		648	0	0	0.975		YFL005W	SEC4	648	0	0.943106		0.0318942	inviable	Rab family GTPase; essential for vesicle-mediated exocytic secretion and autophagy; associates with the exocyst component Sec15p and may regulate polarized delivery of transport vesicles to the exocyst at the plasma membrane	.
	1-to-1	Anc_3.326	CAGL0D01738g		1068	0	0	0.975		YBR087W	RFC5	1065	0	0.945		0.03	inviable	Subunit of heteropentameric Replication factor C (RF-C); RF-C is a DNA binding protein and ATPase that acts as a clamp loader of the proliferating cell nuclear antigen (PCNA) processivity factor for DNA polymerases delta and epsilon	.
	1-to-1	Anc_5.371	CAGL0M01364g	CBF3D	540	0	0	0.975		YDR328C	SKP1	585	0	0.945		0.03	inviable	Evolutionarily conserved kinetochore protein; part of multiple protein complexes, including the SCF ubiquitin ligase complex, the CBF3 complex that binds centromeric DNA, and the RAVE complex that regulates assembly of the V-ATPase; protein abundance increases in response to DNA replication stress	.
	1-to-1	Anc_8.323	CAGL0E01397g		1728	1.04167	0	0.975		YDR145W	TAF12	1620	0	0.95		0.025	inviable	Subunit (61/68 kDa) of TFIID and SAGA complexes; involved in RNA polymerase II transcription initiation and in chromatin modification, similar to histone H2A	.
	1-to-1	Anc_2.201	CAGL0J05610g	TOP2	4221	0	0	0.975		YNL088W	TOP2	4287	0	0.955		0.02	inviable	Topoisomerase II; relieves torsional strain in DNA by cleaving and re-sealing the phosphodiester backbone of both positively and negatively supercoiled DNA; cleaves complementary strands; localizes to axial cores in meiosis; required for replication slow zone (RSZ) breakage following Mec1p inactivation	.
	1-to-1	Anc_3.460	CAGL0L04774g		4350	1.17241	0	0.975		YGR116W	SPT6	4356	0	0.965		0.01	inviable	Nucleosome remodeling protein; functions in various aspects of transcription, chromatin maintenance, and RNA processing; required for the maintenance of chromatin structure during transcription in order to inhibit transcription from promoters within the coding region; required for H3K36 trimethylation but not dimethylation by Set2p	.
	1-to-1	Anc_8.797	CAGL0I09900g		636	2.67296	0	0.975		YOR319W	HSH49	642	0	0.97		0.005	inviable	U2-snRNP associated splicing factor; similar to the mammalian splicing factor SAP49; proposed to function as a U2-snRNP assembly factor along with Hsh155p and binding partner Cus1p; contains two RNA recognition motifs (RRM)	.
	1-to-1	Anc_2.512	CAGL0L02277g		1710	0	0	0.975		YKR002W	PAP1	1707	0	0.97		0.005	inviable	Poly(A) polymerase; one of three factors required for mRNA 3'-end polyadenylation, forms multiprotein complex with polyadenylation factor I (PF I), also required for mRNA nuclear export; may also polyadenylate rRNAs; required for gene looping	.
	1-to-1	Anc_7.196	CAGL0J02442g		1239	0	0	0.975		YIL022W	TIM44	1296	0	0.97		0.005	inviable	Essential component of the TIM23 complex; tethers the import motor and regulatory factors (PAM complex) to the translocation channel (Tim23p-Tim17p core complex); TIM23 complex is short for the translocase of the inner mitochondrial membrane	.
	1-to-1	Anc_6.147	CAGL0K07051g		1254	0	0	0.975		YBR236C	ABD1	1311	0	0.985		-0.01	inviable	Methyltransferase; catalyzes the transfer of a methyl group from S-adenosylmethionine to the GpppN terminus of capped mRNA; nuclear protein that relocalizes to the cytosol in response to hypoxia	.
	1-to-1	Anc_7.315	CAGL0I03806g		2073	0.892426	0	0.975		YDL141W	BPL1	2073	0	0.99		-0.015	inviable	Biotin:apoprotein ligase; covalently modifies proteins with the addition of biotin, required for acetyl-CoA carboxylase (Acc1p) holoenzyme formation	.
	1-to-1	Anc_3.216	CAGL0I04884g		1302	1.88172	0	0.975		YDL007W	RPT2	1314	0	0.99		-0.015	inviable	ATPase of the 19S regulatory particle of the 26S proteasome; one of six ATPases of the regulatory particle; involved in the degradation of ubiquitinated substrates; required for normal peptide hydrolysis by the core 20S particle	.
	1-to-1	Anc_5.486	CAGL0K09526g		1296	0	0	0.975		YDR394W	RPT3	1287	0	0.995		-0.02	inviable	ATPase of the 19S regulatory particle of the 26S proteasome; one of ATPases of the regulatory particle; involved in the degradation of ubiquitinated substrates; substrate of N-acetyltransferase B	.
	1-to-1	Anc_8.394	CAGL0F05665g		1995	0	0	0.975		YDR189W	SLY1	2001	0	0.995		-0.02	inviable	Hydrophilic protein involved in ER/Golgi vesicle trafficking; SM (Sec1/Munc-18) family protein that binds the tSNARE Sed5p and stimulates its assembly into a trans-SNARE membrane-protein complex	.
	1-to-1	Anc_1.013	CAGL0B00484g		2514	0	0	0.975		YCL054W	SPB1	2526	0	0.995		-0.02	inviable	AdoMet-dependent methyltransferase; involved in rRNA processing and 60S ribosomal subunit maturation; methylates G2922 in the tRNA docking site of the large subunit rRNA and in the absence of snR52, U2921; suppressor of PAB1 mutants	.
	1-to-1	Anc_1.528	CAGL0K00319g		3045	0	0	0.975		YKL210W	UBA1	3075	0	0.995		-0.02	inviable	Ubiquitin activating enzyme (E1); involved in ubiquitin-mediated protein degradation and essential for viability; protein abundance increases in response to DNA replication stress	.
	1-to-1	Anc_1.118	CAGL0J07678g		327	1.83486	0	0.975		YNL244C	SUI1	327	0	1		-0.025	inviable	Translation initiation factor eIF1; component of a complex involved in recognition of the initiator codon; modulates translation accuracy at the initiation phase	.
	1-to-1	Anc_2.126	CAGL0K09823g		204	0	0	0.97		YNL138W-A	YSF3	380	0	0.745		0.225	inviable	Component of the SF3b subcomplex of the U2 snRNP; essential protein required for for splicing and for assembly of SF3b	.
	1-to-1	Anc_8.270	CAGL0B01859g		1869	1.44462	0	0.97		YDR118W	APC4	1959	0	0.755		0.215	inviable	Subunit of the Anaphase-Promoting Complex/Cyclosome (APC/C); APC/C is a ubiquitin-protein ligase required for degradation of anaphase inhibitors, including mitotic cyclins, during the metaphase/anaphase transition; component of the platform domain of the APC/C, based on structural analysis; relative distribution to the nucleus increases upon DNA replication stress	.
	1-to-1	Anc_2.375	CAGL0I00704g		831	4.45247	0	0.97		YMR149W	SWP1	861	0	0.78		0.19	inviable	Delta subunit of the oligosaccharyl transferase glycoprotein complex; complex is required for N-linked glycosylation of proteins in the endoplasmic reticulum	.
	1-to-1	Anc_8.124	CAGL0K02387g		1698	0.176678	0	0.97		YGL171W	ROK1	1695	0	0.81		0.16	inviable	RNA-dependent ATPase; involved in pre-rRNA processing at sites A0, A1, and A2, and in control of cell cycle progression; contains two upstream open reading frames (uORFs) in 5' untranslated region which regulate translation	.
	1-to-1	Anc_7.539	CAGL0G09933g		261	0	0	0.97		YPR182W	SMX3	261	0	0.825		0.145	inviable	Core Sm protein Sm F; part of heteroheptameric complex (with Smb1p, Smd1p, Smd2p, Smd3p, Sme1p, and Smx2p) that is part of the spliceosomal U1, U2, U4, and U5 snRNPs; homolog of human Sm F	.
	1-to-1	Anc_3.039	CAGL0M03905g		1761	0.0567859	0	0.97		YNL308C	KRI1	1776	0	0.835		0.135	inviable	Essential nucleolar protein required for 40S ribosome biogenesis; associate with snR30; physically and functionally interacts with Krr1p	.
	1-to-1	Anc_7.288	CAGL0J09350g	CDC48	2493	0	0	0.97		YDL126C	CDC48	2508	0	0.87		0.1	inviable	AAA ATPase; subunit of polyubiquitin-selective segregase complex involved in ERAD, cell wall integrity during heat stress, mitotic spindle disassembly; subunit of complex involved in mitochondria-associated degradation; role in mobilizing membrane bound transcription factors by regulated ubiquitin/proteasome-dependent processing, in macroautophagy, PMN, RAD, ribophagy, homotypic ER membrane fusio…	.
	1-to-1	Anc_1.365	CAGL0A01958g		1221	0	0	0.97		YOL022C	TSR4	1227	0	0.906244		0.0637558	inviable	Cytoplasmic protein required for correct processing of 20S pre-rRNA; protein required for processing of the 20S pre-rRNA at site D to generate mature 18S rRNA; essential gene in S288C background but not in CEN.PK2	.
	1-to-1	Anc_8.358	CAGL0M04631g		300	1.5	0	0.97		YLR147C	SMD3	306	0	0.921208		0.0487916	inviable	Core Sm protein Sm D3; part of heteroheptameric complex (with Smb1p, Smd1p, Smd2p, Sme1p, Smx3p, and Smx2p) that is part of the spliceosomal U1, U2, U4, and U5 snRNPs; homolog of human Sm D3	.
	1-to-1	Anc_5.246	CAGL0D03014g	CCT8	1698	0	0	0.97		YJL008C	CCT8	1707	0	0.935		0.035	inviable	Subunit of the cytosolic chaperonin Cct ring complex; related to Tcp1p, required for the assembly of actin and tubulins in vivo	.
	1-to-1	Anc_4.115	CAGL0A00495g	PMA1	2709	0	0	0.97		YGL008C	PMA1	2757	0	0.935		0.035	inviable	Plasma membrane H+-ATPase; pumps protons out of the cell; major regulator of cytoplasmic pH and plasma membrane potential; P2-type ATPase; Hsp30p plays a role in Pma1p regulation; interactions with Std1p appear to propagate [GAR+]	.
	1-to-1	Anc_2.593	CAGL0F05907g		1389	0	0	0.97		YMR033W	ARP9	1490	0	0.943106		0.0268942	inviable	Component of both the SWI/SNF and RSC chromatin remodeling complexes; actin-related protein involved in transcriptional regulation	.
	1-to-1	Anc_5.319	CAGL0H01463g		4086	0.0489476	0	0.97		YDR301W	CFT1	4074	0	0.943106		0.0268942	inviable	RNA-binding subunit of the mRNA cleavage and polyadenylation factor; involved in poly(A) site recognition and required for both pre-mRNA cleavage and polyadenylation, 51% sequence similarity with mammalian AAUAA-binding subunit of CPSF	.
	1-to-1	Anc_1.164	CAGL0C00363g	KRE9	831	0	0	0.97		YJL174W	KRE9	831	0	0.943106		0.0268942	inviable	Glycoprotein involved in cell wall beta-glucan assembly; null mutation leads to severe growth defects, aberrant multibudded morphology, and mating defects	.
	1-to-1	Anc_2.247	CAGL0J10032g		1860	0	0	0.97		YNL061W	NOP2	1857	0	0.955		0.015	inviable	rRNA m5C methyltransferase; methylates cytosine at position 2870 of 25S rRNA while Rcm1p methylates cytosine at position 2278; contains seven beta-strand methyltransferase motif; essential for processing and maturation of 27S pre-rRNA and large ribosomal subunit biogenesis; localized to the nucleolus; constituent of 66S pre-ribosomal particles; homolog of p120/NSUN1, a human gene upregulated in c…	.
	1-to-1	Anc_5.009	CAGL0M13893g		2433	0	0	0.97		YMR309C	NIP1	2439	0	0.96		0.01	inviable	eIF3c subunit of the eukaryotic translation initiation factor 3 (eIF3); involved in the assembly of preinitiation complex and start codon selection	.
	1-to-1	Anc_5.700	CAGL0H06567g	SLN1	3510	0	0	0.97		YIL147C	SLN1	3663	0	0.97		0	inviable	Histidine kinase osmosensor that regulates a MAP kinase cascade; transmembrane protein with an intracellular kinase domain that signals to Ypd1p and Ssk1p, thereby forming a phosphorelay system similar to bacterial two-component regulators	.
	1-to-1	Anc_8.719	CAGL0F03861g		1293	0	0	0.97		YMR208W	ERG12	1332	0	0.975		-0.005	inviable	Mevalonate kinase; acts in the biosynthesis of isoprenoids and sterols, including ergosterol, from mevalonate	.
	1-to-1	Anc_4.120	CAGL0G00726g	RFA1	1884	0	0	0.97		YAR007C	RFA1	1866	0	0.99		-0.02	inviable	Subunit of heterotrimeric Replication Protein A (RPA); which is a highly conserved single-stranded DNA binding protein involved in DNA replication, repair, and recombination; relocalizes to the cytosol in response to hypoxia	.
	1-to-1	Anc_8.058	CAGL0D02156g		483	7.14286	0	0.97		YFL017C	GNA1	480	0	1		-0.03	inviable	Glucosamine-6-phosphate acetyltransferase; evolutionarily conserved; required for multiple cell cycle events including passage through START, DNA synthesis, and mitosis; involved in UDP-N-acetylglucosamine synthesis, forms GlcNAc6P from AcCoA	.
	1-to-1	Anc_6.103	CAGL0K06633g		957	17.5549	0	0.965		YBR211C	AME1	975	0	0.795		0.17	inviable	Essential kinetochore protein associated with microtubules and SPBs; component of the kinetochore sub-complex COMA (Ctf19p, Okp1p, Mcm21p, Ame1p); involved in spindle checkpoint maintenance; orthologous to human centromere constitutive-associated network (CCAN) subunit CENP-U and fission yeast Mis17; relative distribution to the nucleus increases upon DNA replication stress	.
	1-to-1	Anc_5.631	CAGL0M08646g		1014	0	0	0.965		YDR267C	CIA1	993	0	0.81		0.155	inviable	Component of cytosolic iron-sulfur protein assembly (CIA) machinery; acts at a late step of Fe-S cluster assembly; forms the CIA targeting complex with Cia2p and Met18p that directs Fe-S cluster incorporation into a subset of proteins involved in methionine biosynthesis, DNA replication and repair, transcription, and telomere maintenance; contains WD40 repeats; ortholog of human Ciao1 protein	.
	1-to-1	Anc_7.536	CAGL0G09889g		1011	0	0	0.965		YPR180W	AOS1	1044	0	0.845		0.12	inviable	Subunit of heterodimeric nuclear SUMO activating enzyme E1 with Uba2p; activates Smt3p (SUMO) before its conjugation to proteins (sumoylation), which may play a role in protein targeting; essential for viability; relocalizes to the cytosol in response to hypoxia	.
	1-to-1	Anc_7.326	CAGL0I03674g		1338	0	0	0.965		YDL147W	RPN5	1338	0	0.875		0.09	inviable	Subunit of the CSN and 26S proteasome lid complexes; similar to mammalian p55 subunit and to another S. cerevisiae regulatory subunit, Rpn7p; Rpn5p is an essential protein; the COP9 signalosome is also known as the CSN	.
	1-to-1	Anc_6.072	CAGL0F04961g	SMD2	462	0	0	0.965		YLR275W	SMD2	423	0	0.89		0.075	inviable	Core Sm protein Sm D2; part of heteroheptameric complex (with Smb1p, Smd1p, Smd3p, Sme1p, Smx3p, and Smx2p) that is part of the spliceosomal U1, U2, U4, and U5 snRNPs; homolog of human Sm D2	.
	1-to-1	Anc_3.384	CAGL0J09878g		1905	0	0	0.965		YBR123C	TFC1	1950	0	0.91		0.055	inviable	Subunit of RNA polymerase III transcription initiation factor complex; one of six subunits of the RNA polymerase III transcription initiation factor complex (TFIIIC); part of the TauA globular domain of TFIIIC that binds DNA at the BoxA promoter sites of tRNA and similar genes; human homolog is TFIIIC-63	.
	1-to-1	Anc_3.138	CAGL0K01265g		741	2.2942	0	0.965		YGR075C	PRP38	729	0	0.915		0.05	inviable	Unique component of the U4/U6.U5 tri-snRNP particle; tri-snRNP is required for conformational changes which result in the catalytic activation of the spliceosome; dispensable for spliceosome assembly	.
	1-to-1	Anc_5.433	CAGL0A02794g		838	0	0	0.965		YDR367W	KEI1	767	0	0.925		0.04	inviable	Component of inositol phosphorylceramide (IPC) synthase; forms a complex with Aur1p and regulates its activity; required for IPC synthase complex localization to the Golgi; post-translationally processed by Kex2p; KEI1 is an essential gene	.
	1-to-1	Anc_3.274	CAGL0H10230g		1545	0	0	0.965		YBR060C	ORC2	1863	0	0.925		0.04	inviable	Subunit of the origin recognition complex (ORC); ORC directs DNA replication by binding to replication origins and is also involved in transcriptional silencing; interacts with Spp1p and with trimethylated histone H3; phosphorylated by Cdc28p	.
	1-to-1	Anc_7.258	CAGL0J03168g		2442	1.35135	0	0.965		YIL068C	SEC6	2418	0	0.925		0.04	inviable	Essential 88kDa subunit of the exocyst complex; the exocyst mediates polarized targeting and tethering of post-Golgi secretory vesicles to active sites of exocytosis at the plasma membrane prior to SNARE-mediated fusion; anchors the assembled complex to sites of secretion; interacts with SM-like protein and SNARE regulator Sec1p and may recruit it to sites of secretion; interacts with Sec9p and i…	.
	1-to-1	Anc_2.232	CAGL0G08822g		7002	0.52842	0	0.965		YIL129C	TAO3	7131	0	0.93		0.035	inviable	Component of the RAM signaling network; is involved in regulation of Ace2p activity and cellular morphogenesis, interacts with protein kinase Cbk1p and also with Kic1p	.
	1-to-1	Anc_7.275	CAGL0J03344g		1632	0	0	0.965		YER082C	UTP7	1665	0	0.93		0.035	inviable	Nucleolar protein; component of the small subunit (SSU) processome containing the U3 snoRNA that is involved in processing of pre-18S rRNA	.
	1-to-1	Anc_6.030	CAGL0E02453g		363	0	0	0.965		YOL005C	RPB11	363	0	0.95		0.015	inviable	RNA polymerase II subunit B12.5; part of central core; similar to Rpc19p and bacterial alpha subunit	.
	1-to-1	Anc_8.006	CAGL0L13200g		723	0	0	0.965		YLR078C	BOS1	824	0	0.975		-0.01	inviable	v-SNARE (vesicle specific SNAP receptor); localized to the endoplasmic reticulum membrane and necessary for vesicular transport from the ER to the Golgi	.
	1-to-1	Anc_3.419	CAGL0G01760g		2568	0	0	0.965		YPR105C	COG4	2586	0	0.98		-0.015	inviable	Essential component of the conserved oligomeric Golgi complex; a cytosolic tethering complex (Cog1p through Cog8p) that functions in protein trafficking to mediate fusion of transport vesicles to Golgi compartments	.
	1-to-1	Anc_1.319	CAGL0J05214g		2151	0	0	0.965		YJL061W	NUP82	2142	0	0.985		-0.02	inviable	Linker nucleoporin component of the nuclear pore complex (NPC); also part of the NPC cytoplasmic filaments; contributes to nucleocytoplasmic transport and NPC biogenesis; forms stable associations with three FG-nucleoporins (Nsp1p, Nup159p, and Nup116p); relocalizes to the cytosol in response to hypoxia	.
	1-to-1	Anc_3.122	CAGL0A03652g		2202	0	0	0.965		YBR142W	MAK5	2322	0	0.99		-0.025	inviable	Essential nucleolar protein; putative DEAD-box RNA helicase required for maintenance of M1 dsRNA virus; involved in biogenesis of large (60S) ribosomal subunits	.
	1-to-1	Anc_4.289	CAGL0D00330g	HYM1	1269	5.39795	0	0.965		YKL189W	HYM1	1200	0	0.995		-0.03	inviable	Component of the RAM signaling network; is involved in regulation of Ace2p activity and cellular morphogenesis, interacts with Kic1p and Sog2p, localizes to sites of polarized growth during budding and during the mating response	.
	1-to-1	Anc_7.186	CAGL0D05258g		3513	1.8645	0	0.965		YFR031C	SMC2	3513	0	0.999529		-0.0345285	inviable	Subunit of the condensin complex; condensin reorganizes chromosomes during both mitosis and meiosis; essential SMC chromosomal ATPase family member that forms a subcomplex with Smc2p that has ATP-hydrolyzing and DNA-binding activity, but other condensin subunits are required for chromatin binding; required for clustering of tRNA genes at the nucleolus	.
	1-to-1	Anc_5.243	CAGL0J01067g		1141	0	0	0.965		YJL031C	BET4	1071	0	1		-0.035	inviable	Alpha subunit of Type II geranylgeranyltransferase; required for vesicular transport between the endoplasmic reticulum and the Golgi; provides a membrane attachment moiety to Rab-like proteins Ypt1p and Sec4p	.
	1-to-1	Anc_8.622	CAGL0J06798g		705	0	0	0.96		YPL124W	SPC29	762	0	0.585		0.375	inviable	Inner plaque spindle pole body (SPB) component; links the central plaque component Spc42p to the inner plaque component Spc110p; required for SPB duplication	.
	1-to-1	Anc_3.079	CAGL0I03014g		483	0	0	0.96		YNL282W	POP3	588	0	0.64		0.32	inviable	Subunit of both RNase MRP and nuclear RNase P; RNase MRP cleaves pre-rRNA, while nuclear RNase P cleaves tRNA precursors to generate mature 5' ends and facilitates turnover of nuclear RNAs; relocalizes to the cytosol in response to hypoxia	.
	1-to-1	Anc_3.400	CAGL0C00495g		387	8.01034	0	0.96		YBR135W	CKS1	453	0	0.745		0.215	inviable	Cyclin-dependent protein kinase regulatory subunit and adaptor; interacts with Cdc28p(Cdk1p); required for G1/S and G2/M phase transitions and budding; mediates the phosphorylation and degradation of Sic1p; modulates proteolysis of M-phase targets through interactions with the proteasome; role in transcriptional regulation, recruiting proteasomal subunits to target gene promoters	.
	1-to-1	Anc_5.439	CAGL0I01078g	PFY1	802	0	0	0.96		YOR122C	PFY1	590	0	0.815		0.145	inviable	Profilin; binds actin, phosphatidylinositol 4,5-bisphosphate, and polyproline regions; involved in cytoskeleton organization; required for normal timing of actin polymerization in response to thermal stress; protein abundance increases in response to DNA replication stress	.
	1-to-1	Anc_5.293	CAGL0H01067g		921	0	0	0.96		YDR288W	NSE3	912	0	0.83		0.13	inviable	Component of the SMC5-SMC6 complex; this complex plays a key role in the removal of X-shaped DNA structures that arise between sister chromatids during DNA replication and repair; protein abundance increases in response to DNA replication stress	.
	1-to-1	Anc_4.038	CAGL0E03564g		1638	0	0	0.96		YLR314C	CDC3	1563	0	0.865333		0.0946667	inviable	Component of the septin ring that is required for cytokinesis; septins are GTP-binding proteins that assemble with other septins into rod-like complexes that can associate with other rods to form filament polymers; septin rings at the mother-bud neck act as scaffolds for recruiting factors needed for cell division and as barriers to prevent diffusion of specific proteins between mother and daught…	.
	1-to-1	Anc_3.433	CAGL0G03091g		3318	0	0	0.96		YGR094W	VAS1	3315	0	0.875		0.085	inviable	Mitochondrial and cytoplasmic valyl-tRNA synthetase	.
	1-to-1	Anc_5.201	CAGL0D05588g		1434	0	0	0.96		YLL011W	SOF1	1470	0	0.91		0.05	inviable	Protein required for biogenesis of 40S (small) ribosomal subunit; has similarity to the beta subunit of trimeric G-proteins and the splicing factor Prp4p; essential gene	.
	1-to-1	Anc_1.315	CAGL0I09328g		1092	0.0915751	0	0.96		YBR265W	TSC10	963	0	0.915		0.045	inviable	3-ketosphinganine reductase; catalyzes the second step in phytosphingosine synthesis, essential for growth in the absence of exogenous dihydrosphingosine or phytosphingosine, member of short chain dehydrogenase/reductase protein family	.
	1-to-1	Anc_7.057	CAGL0E05412g		3981	0.0502386	0	0.96		YOR336W	KRE5	4098	0	0.945		0.015	inviable	Protein required for beta-1,6 glucan biosynthesis; mutations result in aberrant morphology and severe growth defects	.
	1-to-1	Anc_5.546	CAGL0H04829g		1098	3.36976	0	0.96		YML015C	TAF11	1041	0	0.945		0.015	inviable	TFIID subunit (40 kDa); involved in RNA polymerase II transcription initiation, similar to histone H3 with atypical histone fold motif of Spt3-like transcription factors	.
	1-to-1	Anc_8.404	CAGL0F05555g		720	0	0	0.96		YDR196C	CAB5	726	0	0.95		0.01	inviable	Subunit of the CoA-Synthesizing Protein Complex (CoA-SPC); subunits of this complex are: Cab2p, Cab3p, Cab4p, Cab5p, Sis2p and Vhs3p; probable dephospho-CoA kinase (DPCK) that catalyzes the last step in coenzyme A biosynthesis; null mutant lethality is complemented by E. coli coaE (encoding DPCK); detected in purified mitochondria in high-throughput studies	.
	1-to-1	Anc_4.126	CAGL0G00594g		1050	0.0952381	0	0.96		YGL001C	ERG26	1050	0	0.95		0.01	inviable	C-3 sterol dehydrogenase; catalyzes the second of three steps required to remove two C-4 methyl groups from an intermediate in ergosterol biosynthesis	.
	1-to-1	Anc_8.737	CAGL0F03993g	ERG8	1347	0.259837	0	0.96		YMR220W	ERG8	1356	0	0.95		0.01	inviable	Phosphomevalonate kinase; an essential cytosolic enzyme that acts in the biosynthesis of isoprenoids and sterols, including ergosterol, from mevalonate	.
	1-to-1	Anc_5.649	CAGL0K08140g		594	0	0	0.96		YKR068C	BET3	582	0	0.955		0.005	inviable	Component of the transport protein particle (TRAPP) complex; hydrophilic protein that acts in conjunction with SNARE proteins in targeting and fusion of ER to Golgi transport vesicles	.
	1-to-1	Anc_3.480	CAGL0D05016g		687	0	0	0.96		YPR143W	RRP15	753	0	0.96		0	inviable	Nucleolar protein; constituent of pre-60S ribosomal particles; required for proper processing of the 27S pre-rRNA at the A3 and B1 sites to yield mature 5.8S and 25S rRNAs	.
	1-to-1	Anc_7.502	CAGL0I08239g		1539	0	0	0.96		YER021W	RPN3	1572	0	0.97		-0.01	inviable	Essential non-ATPase regulatory subunit of the 26S proteasome lid; similar to the p58 subunit of the human 26S proteasome; temperature-sensitive alleles cause metaphase arrest, suggesting a role for the proteasome in cell cycle control	.
	1-to-1	Anc_2.351	CAGL0L07348g		3291	0	0	0.96		YDL102W	POL3	3294	0	0.975		-0.015	inviable	Catalytic subunit of DNA polymerase delta; required for chromosomal DNA replication during mitosis and meiosis, intragenic recombination, repair of double strand DNA breaks, and DNA replication during nucleotide excision repair (NER)	.
	1-to-1	Anc_6.039	CAGL0E02343g		1095	0	0	0.96		YOL010W	RCL1	1104	0	0.975		-0.015	inviable	Endonuclease that cleaves pre-rRNA at site A2 for 18S rRNA biogenesis; subunit of U3-containing 90S preribosome processome complex involved in small ribosomal subunit assembly; stimulates Bms1p GTPase and U3 binding activity; similar to RNA cyclase-like proteins but no cyclase activity detected	.
	1-to-1	Anc_1.018	CAGL0H01551g		1116	0	0	0.96		YDR531W	CAB1	1104	0	0.98		-0.02	inviable	Pantothenate kinase, ATP:D-pantothenate 4'-phosphotransferase; catalyzes the first committed step in the universal biosynthetic pathway for synthesis of coenzyme A (CoA); transcriptionally regulated by Upc2p via a sterol response element	.
	1-to-1	Anc_7.412	CAGL0C01903g		2310	0	0	0.96		YBL084C	CDC27	2277	0	0.98		-0.02	inviable	Subunit of the Anaphase-Promoting Complex/Cyclosome (APC/C); APC/C is a ubiquitin-protein ligase required for degradation of anaphase inhibitors, including mitotic cyclins, during the metaphase/anaphase transition	.
	1-to-1	Anc_2.312	CAGL0E05126g		1101	0	0	0.96		YGL155W	CDC43	1131	0	0.985		-0.025	inviable	Beta subunit of geranylgeranyltransferase type I; catalyzes geranylgeranylation to the cysteine residue in proteins containing a C-terminal CaaX sequence ending in Leu or Phe; has substrates important for morphogenesis	.
	1-to-1	Anc_6.106	CAGL0I00418g		1473	0	0	0.96		YGL055W	OLE1	1533	0	0.985		-0.025	inviable	Delta(9) fatty acid desaturase; required for monounsaturated fatty acid synthesis and for normal distribution of mitochondria	.
	1-to-1	Anc_6.362	CAGL0C03630g		1191	0	0	0.96		YNR043W	MVD1	1191	0	0.999545		-0.0395455	inviable	Mevalonate pyrophosphate decarboxylase; essential enzyme involved in the biosynthesis of isoprenoids and sterols, including ergosterol; acts as a homodimer	.
	1-to-1	Anc_5.343	CAGL0H07249g	DYS1	1158	1.25216	0	0.96		YHR068W	DYS1	1164	0	1		-0.04	inviable	Deoxyhypusine synthase; catalyzes formation of deoxyhypusine, the first step in hypusine biosynthesis; triggers posttranslational hypusination of translation elongation factor eIF-5A and regulates its intracellular levels; tetrameric	.
	1-to-1	Anc_8.196	CAGL0I06710g		2016	0	0	0.955		YER147C	SCC4	1875	0	0.645		0.31	inviable	Subunit of cohesin loading factor (Scc2p-Scc4p); complex is required for the loading of cohesin complexes onto chromosomes; involved in establishing sister chromatid cohesion during double-strand break repair via phosphorylated histone H2AX	.
	1-to-1	Anc_8.353	CAGL0M04587g		633	0	0	0.955		YLR145W	RMP1	606	0	0.705		0.25	inviable	Subunit of RNase MRP; RNase MRP processes pre-rRNA and has a role in cell cycle-regulated degradation of daughter cell-specific mRNAs; unlike most subunits, not shared between RNase MRP and nuclear RNase P	.
	1-to-1	Anc_1.020	CAGL0H01595g		1284	0	0	0.955		YDR527W	RBA50	1320	0	0.785		0.17	inviable	Protein involved in transcription; interacts with RNA polymerase II subunits Rpb2p, Rpb3, and Rpb11p; has similarity to human RPAP1	.
	1-to-1	Anc_2.514	CAGL0L02255g		1128	0	0	0.955		YKR004C	ECM9	1238	0	0.805		0.15	inviable	Non-essential protein of unknown function	.
	1-to-1	Anc_7.356	CAGL0A04037g		1752	0	0	0.955		YLR196W	PWP1	1731	0	0.905		0.05	inviable	Protein with WD-40 repeats involved in rRNA processing; associates with trans-acting ribosome biogenesis factors; similar to beta-transducin superfamily	.
	1-to-1	Anc_2.581	CAGL0M07425g		1128	0.177305	0	0.955		YMR028W	TAP42	1101	0	0.906244		0.0487558	inviable	Essential protein involved in the TOR signaling pathway; physically associates with the protein phosphatase 2A and the SIT4 protein phosphatase catalytic subunits	.
	1-to-1	Anc_5.683	CAGL0G02299g		3174	0.63012	0	0.955		YKR086W	PRP16	3216	0	0.935		0.02	inviable	DEAH-box RNA helicase involved in second catalytic step of splicing; exhibits ATP-dependent RNA unwinding activity; mediates the release of Yju2p and Cwc25p in the second step; in the absence of ATP, stabilizes the binding of Cwc25p to the spliceosome in the first catalytic step	.
	1-to-1	Anc_3.482	CAGL0I10670g		1668	0.629496	0	0.955		YPR144C	NOC4	1659	0	0.94		0.015	inviable	Nucleolar protein; forms a complex with Nop14p that mediates maturation and nuclear export of 40S ribosomal subunits; relocalizes to the cytosol in response to hypoxia	.
	1-to-1	Anc_1.006	CAGL0B00352g		1014	0	0	0.955		YCL059C	KRR1	951	0	0.945		0.01	inviable	Nucleolar protein required for rRNA synthesis and ribosomal assembly; required for the synthesis of 18S rRNA and for the assembly of 40S ribosomal subunit; essential gene	.
	1-to-1	Anc_5.041	CAGL0F08459g		2253	0	0	0.955		YGR264C	MES1	2256	0	0.95		0.005	inviable	Methionyl-tRNA synthetase; forms a complex with glutamyl-tRNA synthetase (Gus1p) and Arc1p, which increases the catalytic efficiency of both tRNA synthetases; also has a role in nuclear export of tRNAs	.
	1-to-1	Anc_6.355	CAGL0G07975g		1956	0	0	0.955		YNR038W	DBP6	1890	0	0.955		0	inviable	Essential protein involved in ribosome biogenesis; putative ATP-dependent RNA helicase of the DEAD-box protein family	.
	1-to-1	Anc_5.587	CAGL0K06435g		4824	1.8864	0	0.955		YDR464W	SPP41	4308	0	0.955		0	inviable	Protein of unknown function; involved in negative regulation of expression of spliceosome components PRP4 and PRP3; relocalizes to the cytosol in response to hypoxia	.
	1-to-1	Anc_8.787	CAGL0I09790g		1542	0.324254	0	0.955		YOR310C	NOP58	1536	0	0.965		-0.01	inviable	Protein involved in producing mature rRNAs and snoRNAs; involved in pre-rRNA processing, 18S rRNA synthesis, and snoRNA synthesis; component of the small subunit processome complex, which is required for processing of pre-18S rRNA	.
	1-to-1	Anc_1.176	CAGL0L00319g	ERG20	1056	0	0	0.955		YJL167W	ERG20	1059	0	0.975		-0.02	inviable	Farnesyl pyrophosphate synthetase; has both dimethylallyltranstransferase and geranyltranstransferase activities; catalyzes the formation of C15 farnesyl pyrophosphate units for isoprenoid and sterol biosynthesis	.
	1-to-1	Anc_8.159	CAGL0K02079g	GLC7	939	0	0	0.955		YER133W	GLC7	1464	0	0.975		-0.02	inviable	Type 1 serine/threonine protein phosphatase catalytic subunit; involved in various processes including glycogen metabolism, sporulation, mitosis; accumulates at mating projections by interaction with Afr1p; interacts with many regulatory subunits; involved in regulation of the nucleocytoplasmic shuttling of Hxk2p; import into nucleus is inhibited during spindle assembly checkpoint arrest	.
	1-to-1	Anc_5.268	CAGL0J00671g		1446	0	0	0.955		YHR024C	MAS2	1449	0	0.975		-0.02	inviable	Larger subunit of the mitochondrial processing protease (MPP); essential processing enzyme that cleaves the N-terminal targeting sequences from mitochondrially imported proteins	.
	1-to-1	Anc_4.298	CAGL0D03564g		1056	2.55682	0	0.955		YKL193C	SDS22	1017	0	0.975		-0.02	inviable	Regulatory subunit of the type 1 protein phosphatase (PP1) Glc7p; whether it functions as a positive or negative regulator of Glc7p is controversial; involved in the regulation of Glc7p nuclear localization and function	.
	1-to-1	Anc_2.304	CAGL0M06853g		1401	0	0	0.955		YNL026W	SAM50	1455	0	0.985		-0.03	inviable	Component of the Sorting and Assembly Machinery (SAM) complex; the SAM (or TOB) comlex is located in the mitochondrial outer membrane; the complex binds precursors of beta-barrel proteins and facilitates their outer membrane insertion; homologous to bacterial Omp85	.
	1-to-1	Anc_5.367	CAGL0M01408g		3147	0.476644	0	0.955		YDR325W	YCG1	3108	0	0.995		-0.04	inviable	Subunit of the condensin complex; required for establishment and maintenance of chromosome condensation, chromosome segregation and chromatin binding of the condensin complex; required for clustering of tRNA genes at the nucleolus; required for replication slow zone (RSZ) breakage following Mec1p inactivation	.
	1-to-1	Anc_8.222	CAGL0H04917g		957	0	0	0.95		YDR088C	SLU7	1149	0	0.61		0.34	inviable	RNA splicing factor; required for ATP-independent portion of 2nd catalytic step of spliceosomal RNA splicing; interacts with Prp18p; contains zinc knuckle domain	.
	1-to-1	Anc_6.312	CAGL0I05566g		639	0	0	0.95		YNR017W	TIM23	669	0	0.855		0.095	inviable	Essential component of the TIM23 complex; involved in protein import into mitochondrial matrix and inner membrane; with Tim17p, contributes to architecture and function of the import channel; TIM23 complex is short for the translocase of the inner mitochondrial membrane	.
	1-to-1	Anc_1.397	CAGL0H03685g		1425	0	0	0.95		YLR175W	CBF5	1452	0	0.86		0.09	inviable	Pseudouridine synthase catalytic subunit of box H/ACA snoRNPs; acts on both large and small rRNAs and on snRNA U2; mutations in human ortholog dyskerin cause the disorder dyskeratosis congenita; small nucleolar ribonucleoprotein particles are also known as snoRNPs	.
	1-to-1	Anc_3.103	CAGL0I07645g		969	0	0	0.95		YOL094C	RFC4	972	0	0.921208		0.0287916	inviable	Subunit of heteropentameric Replication factor C (RF-C); which is a DNA binding protein and ATPase that acts as a clamp loader of the proliferating cell nuclear antigen (PCNA) processivity factor for DNA polymerases delta and epsilon; relocalizes to the cytosol in response to hypoxia	.
	1-to-1	Anc_4.180	CAGL0G01144g		2586	0	0	0.95		YLR347C	KAP95	2586	0	0.935		0.015	inviable	Karyopherin beta; forms a complex with Srp1p/Kap60p; interacts with nucleoporins to mediate nuclear import of NLS-containing cargo proteins via the nuclear pore complex; regulates PC biosynthesis; GDP-to-GTP exchange factor for Gsp1p	.
	1-to-1	Anc_1.089	CAGL0J08096g	UFD1	999	0.2002	0	0.95		YGR048W	UFD1	1086	0	0.935		0.015	inviable	Substrate-recruiting cofactor of the Cdc48p-Npl4p-Ufd1p segregase; polyubiquitin binding protein that assists in the dislocation of misfolded, ERAD substrates that are subsequently delivered to the proteasome for degradation; involved in regulated destruction of ER membrane proteins such as HMG-CoA reductase (Hmg1/2p) and cytoplasmic proteins (Fbp1p); involved in mobilizing membrane bound transac…	.
	1-to-1	Anc_8.545	CAGL0H05401g		837	0	0	0.95		YPL076W	GPI2	843	0	0.94		0.01	inviable	Protein involved in the synthesis of GlcNAc-PI; GlcNAc-PI is the first intermediate in the synthesis of glycosylphosphatidylinositol (GPI) anchors; homologous to the human PIG-C protein; GlcNAc-PI stands for N-acetylglucosaminyl phosphatidylinositol	.
	1-to-1	Anc_2.384	CAGL0L06908g		1320	0	0	0.95		YDL084W	SUB2	1341	0	0.943106		0.00689416	inviable	Component of the TREX complex required for nuclear mRNA export; member of the DEAD-box RNA helicase superfamily and is involved in early and late steps of spliceosome assembly; homolog of the human splicing factor hUAP56; relocalizes from nucleus to cytoplasm upon DNA replication stress	.
	1-to-1	Anc_3.073	CAGL0M03531g		2799	0.785995	0	0.95		YNL287W	SEC21	2808	0	0.945		0.005	inviable	Gamma subunit of coatomer; coatomer is a heptameric protein complex that together with Arf1p forms the COPI coat; involved in ER to Golgi transport of selective cargo	.
	1-to-1	Anc_2.342	CAGL0L07414g		1080	0	0	0.95		YDL105W	NSE4	1209	0	0.955		-0.005	inviable	Component of the SMC5-SMC6 complex; this complex plays a key role in the removal of X-shaped DNA structures that arise between sister chromatids during DNA replication and repair	.
	1-to-1	Anc_5.064	CAGL0I02442g	PUP2	783	0.255428	0	0.95		YGR253C	PUP2	783	0	0.955		-0.005	inviable	Alpha 5 subunit of the 20S proteasome; involved in ubiquitin-dependent catabolism; human homolog is subunit zeta	.
	1-to-1	Anc_3.201	CAGL0C04235g		1302	5.22273	0	0.95		YBR004C	GPI18	1302	0	0.97		-0.02	inviable	Functional ortholog of human PIG-V; PIG-V is a mannosyltransferase that transfers the second mannose in glycosylphosphatidylinositol biosynthesis; the authentic, non-tagged protein was localized to mitochondria	.
	1-to-1	Anc_7.322	CAGL0I03718g		3606	0	0	0.95		YDL145C	COP1	3606	0	0.98		-0.03	inviable	Alpha subunit of COPI vesicle coatomer complex; complex surrounds transport vesicles in the early secretory pathway	.
	1-to-1	Anc_2.550	CAGL0K03135g		360	0	0	0.95		YHL015W	RPS20	366	0	0.98		-0.03	inviable	Protein component of the small (40S) ribosomal subunit; overproduction suppresses mutations affecting RNA polymerase III-dependent transcription; homologous to mammalian ribosomal protein S20 and bacterial S10	.
	1-to-1	Anc_5.608	CAGL0M08976g		1371	1.09409	0	0.95		YDR473C	PRP3	1410	0	0.985		-0.035	inviable	Splicing factor; component of the U4/U6-U5 snRNP complex	.
	1-to-1	Anc_6.302	CAGL0I05720g		1149	0	0	0.95		YMR203W	TOM40	1164	0	0.985		-0.035	inviable	Component of the TOM (translocase of outer membrane) complex; responsible for recognition and initial import steps for all mitochondrially directed proteins; constitutes the core element of the protein conducting pore; pre-Tom40p is phosphorylated by PKA, which impairs its import into mitochondria under non-respiratory conditions	.
	1-to-1	Anc_2.044	CAGL0H08019g		1278	0.156495	0	0.95		YNL207W	RIO2	1278	0	0.99		-0.04	inviable	Essential serine kinase involved in the processing of 20S pre-rRNA; involved in the processing of the 20S pre-rRNA into mature 18S rRNA; has similarity to Rio1p	.
	1-to-1	Anc_8.593	CAGL0M06039g		369	0	0	0.95		YBR167C	POP7	423	0	0.995		-0.045	inviable	Subunit of both RNase MRP and nuclear RNase P; RNase MRP cleaves pre-rRNA, while nuclear RNase P cleaves tRNA precursors to generate mature 5' ends and facilitates turnover of nuclear RNAs	.
	1-to-1	Anc_8.771	CAGL0M05005g		501	3.59281	0	0.945		YMR236W	TAF9	474	0	0.815		0.13	inviable	Subunit (17 kDa) of TFIID and SAGA complexes; involved in RNA polymerase II transcription initiation and in chromatin modification, similar to histone H3	.
	1-to-1	Anc_7.357	CAGL0A04059g	NMT1	1356	0	0	0.945		YLR195C	NMT1	1368	0	0.925		0.02	inviable	N-myristoyl transferase; catalyzes the cotranslational, covalent attachment of myristic acid to the N-terminal glycine residue of several proteins involved in cellular growth and signal transduction	.
	1-to-1	Anc_7.543	CAGL0G10021g		1185	0	0	0.945		YPR186C	PZF1	1290	0	0.925		0.02	inviable	Transcription factor IIIA (TFIIIA); essential DNA binding protein required for transcription of 5S rRNA by RNA polymerase III; not involved in transcription of other RNAP III genes; nine conserved zinc fingers; may also bind 5S rRNA	.
	1-to-1	Anc_6.129	CAGL0F07073g		762	0	0	0.945		YGL123W	RPS2	765	0	0.95		-0.005	inviable	Protein component of the small (40S) subunit; essential for control of translational accuracy; phosphorylation by C-terminal domain kinase I (CTDK-I) enhances translational accuracy; methylated on one or more arginine residues by Hmt1p; homologous to mammalian ribosomal protein S2 and bacterial S5	.
	1-to-1	Anc_2.305	CAGL0M06721g		1077	5.19963	0	0.945		YIL083C	CAB2	1098	0	0.955		-0.01	inviable	Subunit of the CoA-Synthesizing Protein Complex (CoA-SPC); subunits of this complex are: Cab2p, Cab3p, Cab4p, Cab5p, Sis2p and Vhs3p; probable phosphopantothenoylcysteine synthetase (PPCS), which catalyzes the second step of coenzyme A biosynthesis from pantothenate; null mutant lethality is complemented by E. coli coaBC (encoding a bifunctional enzyme with PPCS activity)	.
	1-to-1	Anc_6.306	CAGL0I05676g		2277	3.73298	0	0.945		YNR011C	PRP2	2631	0	0.955		-0.01	inviable	RNA-dependent ATPase in the DEAH-box family; required for activation of the spliceosome before the first transesterification step in RNA splicing; orthologous to human protein DHX16	.
	1-to-1	Anc_3.515	CAGL0A03718g		4959	0.0403307	0	0.945		YGL206C	CHC1	4962	0	0.9635		-0.0185	inviable	Clathrin heavy chain; subunit of the major coat protein involved in intracellular protein transport and endocytosis; the clathrin triskelion is a trimeric molecule composed of three heavy chains that radiate from a vertex and three light chains which bind noncovalently near the vertex of the triskelion; the light chain (CLC1) is thought to regulate function	.
	1-to-1	Anc_2.189	CAGL0L03740g		783	0	0	0.945		YOR095C	RKI1	777	0	0.965		-0.02	inviable	Ribose-5-phosphate ketol-isomerase; catalyzes the interconversion of ribose 5-phosphate and ribulose 5-phosphate in the pentose phosphate pathway; participates in pyridoxine biosynthesis	.
	1-to-1	Anc_5.108	CAGL0I01826g		552	0	0	0.945		YHR148W	IMP3	552	0	0.975		-0.03	inviable	Component of the SSU processome; SSU processome is required for pre-18S rRNA processing, essential protein that interacts with Mpp10p and mediates interactions of Imp4p and Mpp10p with U3 snoRNA	.
	1-to-1	Anc_4.170	CAGL0G00990g	RPP0	936	0	0	0.945		YLR340W	RPP0	939	0	0.98		-0.035	inviable	Conserved ribosomal protein P0 of the ribosomal stalk; involved in interaction between translational elongation factors and the ribosome; phosphorylated on serine 302; homologous to mammalian ribosomal protein LP0 and bacterial L10	.
	1-to-1	Anc_8.175	CAGL0K01925g	GDI1	1347	0	0	0.945		YER136W	GDI1	1356	0	0.995		-0.05	inviable	GDP dissociation inhibitor; regulates vesicle traffic in secretory pathways by regulating the dissociation of GDP from the Sec4/Ypt/rab family of GTP binding proteins	.
	1-to-1	Anc_3.554	CAGL0H07909g		2649	0	0	0.945		YGL233W	SEC15	2733	0	0.995		-0.05	inviable	Essential 113 kDa subunit of the exocyst complex; the exocyst mediates polarized targeting and tethering of post-Golgi secretory vesicles to active sites of exocytosis prior to SNARE-mediated fusion; interacts with and functions as a downstream effector of active, GTP-bound Sec4p, a Rab family GTPase	.
	1-to-1	Anc_8.676	CAGL0M02233g		2304	0.390625	0	0.94		YPL153C	RAD53	2466	0	0.615		0.325	inviable	Protein kinase; required for cell-cycle arrest in response to DNA damage; activated by trans autophosphorylation when interacting with hyperphosphorylated Rad9p; also interacts with ARS1 and plays a role in initiation of DNA replication; relocalizes to the cytosol in response to hypoxia	.
	1-to-1	Anc_8.265	CAGL0L12298g		861	0	0	0.94		YDR113C	PDS1	1122	0	0.68		0.26	inviable	Securin; inhibits anaphase by binding separin Esp1p; blocks cyclin destruction and mitotic exit, essential for meiotic progression and mitotic cell cycle arrest; localization is cell-cycle dependent and regulated by Cdc28p phosphorylation	.
	1-to-1	Anc_1.349	CAGL0I09064g		1593	0.188324	0	0.94		YFR028C	CDC14	1656	0	0.79		0.15	inviable	Protein phosphatase required for mitotic exit; required for rDNA segregation; located in nucleolus until liberated by the FEAR and Mitotic Exit Network in anaphase, enabling it to effect a decrease in CDK/B-cyclin activity and mitotic exit; required for meiosis I spindle disassembly; released from nucleolus upon entry into anaphase I of meiosis, resequestered in metaphase II, then released again …	.
	1-to-1	Anc_8.727	CAGL0F03773g		2250	0	0	0.94		YMR212C	EFR3	2349	0	0.885		0.055	inviable	Protein required for Stt4-containing PI kinase complex localization; required for Stt4-containing phosphoinositide (PI) kinase patch assembly at the plasma membrane; exhibits synthetic lethal genetic interactions with PHO85; has sequence similarity to the Drosophila rolling blackout (RBO) gene	.
	1-to-1	Anc_5.025	CAGL0G00418g		3120	0.128205	0	0.94		YGR274C	TAF1	3201	0	0.91		0.03	inviable	TFIID subunit, involved in RNA pol II transcription initiation; possesses in vitro histone acetyltransferase activity but its role in vivo appears to be minor; involved in promoter binding and G1/S progression; relocalizes to the cytosol in response to hypoxia	.
	1-to-1	Anc_8.438	CAGL0K11462g		396	11.6162	0	0.94		YDR224C	HTB1	396	0	0.915		0.025	inviable	Histone H2B; core histone protein required for chromatin assembly and chromosome function; nearly identical to HTB2; Rad6p-Bre1p-Lge1p mediated ubiquitination regulates transcriptional activation, meiotic DSB formation and H3 methylation	.
	1-to-1	Anc_8.015	CAGL0L13112g	RGR1	3114	0	0	0.94		YLR071C	RGR1	3249	0	0.925		0.015	inviable	Subunit of the RNA polymerase II mediator complex; associates with core polymerase subunits to form the RNA polymerase II holoenzyme; required for glucose repression, HO repression, RME1 repression and sporulation	.
	1-to-1	Anc_5.157	CAGL0B03795g		912	0	0	0.94		YJR007W	SUI2	915	0	0.925		0.015	inviable	Alpha subunit of the translation initiation factor eIF2; eIF2 is involved in identification of the start codon; phosphorylation of Ser51 is required for regulation of translation by inhibiting the exchange of GDP for GTP; protein abundance increases in response to DNA replication stress	.
	1-to-1	Anc_6.224	CAGL0E05742g		1944	0.977366	0	0.94		YPL210C	SRP72	1923	0	0.945		-0.005	inviable	Core component of the signal recognition particle (SRP); the SRP is a ribonucleoprotein (RNP) complex that functions in targeting nascent secretory proteins to the endoplasmic reticulum (ER) membrane	.
	1-to-1	Anc_8.866	CAGL0B02541g		1767	0.141483	0	0.94		YML127W	RSC9	1746	0	0.955		-0.015	inviable	Component of the RSC chromatin remodeling complex; DNA-binding protein involved in the synthesis of rRNA and in transcriptional repression and activation of genes regulated by the Target of Rapamycin (TOR) pathway	.
	1-to-1	Anc_5.001	CAGL0M14003g		702	0.498575	0	0.94		YMR314W	PRE5	705	0	0.96		-0.02	inviable	Alpha 6 subunit of the 20S proteasome; protein abundance increases in response to DNA replication stress	.
	1-to-1	Anc_8.393	CAGL0G08272g		1650	0	0	0.94		YDR188W	CCT6	1641	0	0.975		-0.035	inviable	Subunit of the cytosolic chaperonin Cct ring complex; related to Tcp1p, essential protein that is required for the assembly of actin and tubulins in vivo; contains an ATP-binding motif	.
	1-to-1	Anc_5.545	CAGL0F03179g		1602	0	0	0.94		YDR434W	GPI17	1605	0	0.99		-0.05	inviable	Transmembrane protein; subunit of the glycosylphosphatidylinositol transamidase complex that adds GPIs to newly synthesized proteins; human PIG-S homolog	.
	1-to-1	Anc_7.354	CAGL0A04015g		1527	0	0	0.935		YLR197W	NOP56	1515	0	0.835		0.1	inviable	Essential evolutionarily-conserved nucleolar protein; component of the box C/D snoRNP complexes that direct 2'-O-methylation of pre-rRNA during its maturation; overexpression causes spindle orientation defects	.
	1-to-1	Anc_5.378	CAGL0H02167g		1011	0	0	0.935		YHR083W	SAM35	990	0	0.835		0.1	inviable	Component of the sorting and assembly machinery (SAM) complex; the SAM (or TOB) complex is located in the mitochondrial outer membrane; the complex binds precursors of beta-barrel proteins and facilitates their insertion into the outer membrane	.
	1-to-1	Anc_3.504	CAGL0I10318g	NDC10	2721	0	0	0.935		YGR140W	CBF2	2871	0	0.855		0.08	inviable	Essential kinetochore protein; component of the CBF3 multisubunit complex that binds to the CDEIII region of the centromere; Cbf2p also binds to the CDEII region possibly forming a different multimeric complex, ubiquitinated in vivo; relative distribution to the spindle pole body decreases upon DNA replication stress	.
	1-to-1	Anc_8.846	CAGL0M03047g		915	4.2623	0	0.935		YMR281W	GPI12	915	0	0.88		0.055	inviable	ER membrane protein involved in the second step of GPI anchor assembly; the second step is the de-N-acetylation of the N-acetylglucosaminylphosphatidylinositol intermediate; functional homolog of human PIG-Lp; GPI stands for glycosylphosphatidylinositol	.
	1-to-1	Anc_5.422	CAGL0A02695g		2076	3.58863	0	0.935		YDR362C	TFC6	2019	0	0.925		0.01	inviable	Subunit of RNA polymerase III transcription initiation factor complex; one of six subunits of RNA polymerase III transcription initiation factor complex (TFIIIC); part of TFIIIC TauB domain that binds BoxB promoter sites of tRNA and other genes; cooperates with Tfc3p in DNA binding; human homolog is TFIIIC-110	.
	1-to-1	Anc_7.534	CAGL0G09845g		1503	0	0	0.935		YPR178W	PRP4	1398	0	0.95		-0.015	inviable	Splicing factor; component of the U4/U6-U5 snRNP complex	.
	1-to-1	Anc_8.029	CAGL0K12606g		978	0	0	0.935		YFL034C-B	MOB2	978	0	0.96		-0.025	inviable	Activator of Cbk1p kinase; component of the RAM signaling network that regulates cellular polarity and morphogenesis; activation of Cbk1p facilitates the Ace2p-dependent daughter cell-specific transcription of genes involved in cell separation; similar to Mob1p	.
	1-to-1	Anc_8.877	CAGL0H06919g		1884	0	0	0.935		YML130C	ERO1	1692	0	0.975		-0.04	inviable	Thiol oxidase required for oxidative protein folding in the ER; essential for maintaining proper redox balance in ER; feedback regulation of Ero1p occurs via reduction and oxidation of Ero1p regulatory bonds; reduced Pdi1p activates Ero1p by direct reduction of Ero1p regulatory bonds; depletion of thiol substrates and accumulation of oxidized Pdi1p results in inactivation of Ero1p by both Pdi1p-m…	.
	1-to-1	Anc_3.516	CAGL0C03047g		3084	0	0	0.935		YGL207W	SPT16	3108	0	0.985		-0.05	inviable	Subunit of the heterodimeric FACT complex (Spt16p-Pob3p); FACT associates with chromatin via interaction with Nhp6Ap and Nhp6Bp, and reorganizes nucleosomes to facilitate access to DNA by RNA and DNA polymerases; SPT16 specifically required for diauxic shift-induced H2B deposition onto rDNA genes; some mutations cause reduced nucleosome occupancy over highly transcribed regions of the yeast genome	.
	1-to-1	Anc_2.221	CAGL0J10252g		867	1.26874	0	0.935		YNL075W	IMP4	873	0	1		-0.065	inviable	Component of the SSU processome; SSU processome is required for pre-18S rRNA processing; interacts with Mpp10p; member of a superfamily of proteins that contain a sigma(70)-like motif and associate with RNAs	.
	1-to-1	Anc_1.516	CAGL0F00473g		435	0.804598	0	0.93		YJR067C	YAE1	426	0	0.792237		0.137763	inviable	Protein that forms a complex with Lto1p and Rli1p; essential for growth under standard (aerobic) conditions but not under anaerobic conditions; may have a role in protection of ribosomal assembly and function from damage due to reactive oxygen species	.
	1-to-1	Anc_3.129	CAGL0I07975g		885	0	0	0.93		YOL077C	BRX1	876	0	0.88		0.05	inviable	Nucleolar protein; constituent of 66S pre-ribosomal particles; depletion leads to defects in rRNA processing and a block in the assembly of large ribosomal subunits; possesses a sigma(70)-like RNA-binding motif	.
	1-to-1	Anc_6.040	CAGL0J11726g		1011	0	0	0.93		YMR005W	TAF4	1167	0	0.895		0.035	inviable	TFIID subunit (48 kDa); involved in RNA polymerase II transcription initiation; potential Cdc28p substrate	.
	1-to-1	Anc_5.233	CAGL0J00957g		594	0	0	0.93		YLR009W	RLP24	600	0	0.921208		0.00879164	inviable	Essential protein required for ribosomal large subunit biogenesis; associated with pre-60S ribosomal subunits; stimulates the ATPase activity of Afg2p, which is required for release of Rlp24p from the pre-60S particle; has similarity to Rpl24Ap and Rpl24Bp	.
	1-to-1	Anc_5.047	CAGL0M13453g		1941	0	0	0.93		YHR188C	GPI16	1833	0	0.955		-0.025	inviable	Subunit of the glycosylphosphatidylinositol transamidase complex; transmembrane protein; adds GPIs to newly synthesized proteins; human PIG-Tp homolog	.
	1-to-1	Anc_1.350	CAGL0I09042g		786	0	0	0.93		YFR027W	ECO1	846	0	0.96		-0.03	inviable	Acetyltransferase; required for establishment of sister chromatid cohesion; acetylates Mps3p to regulate nuclear organization; modifies Smc3p at replication forks and Mcd1p in response to ds DNA breaks; has a C2H2-type zinc finger; mutations in human homolog ESCO2 cause Roberts syndrome; relative distribution to the nucleus increases upon DNA replication stress	.
	1-to-1	Anc_1.246	CAGL0L03223g		924	0	0	0.93		YKR037C	SPC34	888	0	0.965		-0.035	inviable	Essential subunit of the Dam1 complex (aka DASH complex); complex couples kinetochores to the force produced by MT depolymerization thereby aiding in chromosome segregation; also localized to nuclear side of spindle pole body	.
	1-to-1	Anc_2.181	CAGL0B04499g		405	0	0	0.93		YOR103C	OST2	393	0	1		-0.07	inviable	Epsilon subunit of the oligosaccharyltransferase complex; located in the ER lumen; catalyzes asparagine-linked glycosylation of newly synthesized proteins	.
	1-to-1	Anc_5.263	CAGL0E06336g		765	0	0	0.925		YKL154W	SRP102	735	0	0.79		0.135	inviable	Signal recognition particle (SRP) receptor beta subunit; involved in SRP-dependent protein targeting; anchors the alpha subunit, Srp101p to the ER membrane	.
	1-to-1	Anc_7.449	CAGL0K05357g	GLN1	1119	0	0	0.925		YPR035W	GLN1	1113	0	0.81		0.115	inviable	Glutamine synthetase (GS); synthesizes glutamine from glutamate and ammonia; with Glt1p, forms the secondary pathway for glutamate biosynthesis from ammonia; expression regulated by nitrogen source and by amino acid limitation; relocalizes from nucleus to cytoplasmic foci upon DNA replication stress	.
	1-to-1	Anc_5.216	CAGL0D03058g		648	0	0	0.925		YJL001W	PRE3	764	0	0.87		0.055	inviable	Beta 1 subunit of the 20S proteasome; responsible for cleavage after acidic residues in peptides	.
	1-to-1	Anc_7.176	CAGL0D05346g		519	0	0	0.925		YBR254C	TRS20	528	0	0.885		0.04	inviable	Component of the transport protein particle (TRAPP) complex; mutation of conserved residues leads to defects in endocytic recycling and a block in sporulation/meiosis; TRAPP mediates mediates vesicle docking and fusion; mutations in the human homolog cause the spondyloepiphyseal dysplasia tarda (SEDL) disorder	.
	1-to-1	Anc_1.174	CAGL0M08294g		2970	0.03367	0	0.925		YKL173W	SNU114	3027	0	0.89		0.035	inviable	GTPase component of U5 snRNP involved in mRNA splicing via spliceosome; binds directly to U5 snRNA; proposed to be involved in conformational changes of the spliceosome; similarity to ribosomal translocation factor EF-2	.
	1-to-1	Anc_4.098	CAGL0A00209g		2181	0	0	0.925		YGL022W	STT3	2157	0	0.92		0.005	inviable	Subunit of the oligosaccharyltransferase complex of the ER lumen; complex catalyzes asparagine-linked glycosylation of newly synthesized proteins; forms a subcomplex with Ost3p and Ost4p and is directly involved in catalysis	.
	1-to-1	Anc_8.748	CAGL0M04719g		942	0	0	0.925		YOR287C	RRP36	903	0	0.925		0	inviable	Component of 90S preribosomes; involved in early cleavages of the 35S pre-rRNA and in production of the 40S ribosomal subunit	.
	1-to-1	Anc_2.291	homolog found				0			YNL024C-A	KSH1	219	0	0.895			inviable	Essential protein suggested to function early in the secretory pathway; inviability is suppressed by overexpression of Golgi protein Tvp23p; ortholog of human Kish	.
	1-to-1	Anc_5.444	CAGL0A02948g		573	0	0	0.925		YDR373W	FRQ1	573	0	0.943106		-0.0181058	inviable	N-myristoylated calcium-binding protein; may have a role in intracellular signaling through its regulation of the phosphatidylinositol 4-kinase Pik1p; member of the recoverin/frequenin branch of the EF-hand superfamily	.
	1-to-1	Anc_7.506	CAGL0I08283g	PRO3	852	0	0	0.925		YER023W	PRO3	861	0	0.943106		-0.0181058	inviable	Delta 1-pyrroline-5-carboxylate reductase; catalyzes the last step in proline biosynthesis	.
	1-to-1	Anc_4.116	CAGL0G00748g		858	3.37995	0	0.925		YAR008W	SEN34	828	0	0.945		-0.02	inviable	Subunit of the tRNA splicing endonuclease; tRNA splicing endonuclease is composed of Sen2p, Sen15p, Sen34p, and Sen54p; Sen34p contains the active site for tRNA 3' splice site cleavage and has similarity to Sen2p and to Archaeal tRNA splicing endonuclease	.
	1-to-1	Anc_2.235	CAGL0G08756g		4065	0	0	0.925		YIL126W	STH1	4080	0	0.95		-0.025	inviable	ATPase component of the RSC chromatin remodeling complex; required for expression of early meiotic genes; essential helicase-related protein homologous to Snf2p	.
	1-to-1	Anc_7.022	CAGL0K09966g	PRT1	2160	0	0	0.925		YOR361C	PRT1	2292	0	0.975		-0.05	inviable	eIF3b subunit of the eukaryotic translation initiation factor 3 (eIF3); subunit of the core complex of eIF3; essential for translation; part of a subcomplex (Prt1p-Rpg1p-Nip1p) that stimulates binding of mRNA and tRNA(i)Met to ribosomes	.
	1-to-1	Anc_8.872	CAGL0H06985g		2637	0	0	0.925		YML093W	UTP14	2700	0	0.99		-0.065	inviable	Subunit of U3-containing Small Subunit (SSU) processome complex; involved in production of 18S rRNA and assembly of small ribosomal subunit	.
	1-to-1	Anc_8.309	CAGL0D02354g		1398	1.00143	0	0.92		YLR116W	MSL5	1431	0	0.755		0.165	inviable	Component of commitment complex; which defines first step in splicing pathway; essential protein that interacts with Mud2p and Prp40p, forming a bridge between the intron ends; also involved in nuclear retention of pre-mRNA; relocalizes to the cytosol in response to hypoxia	.
	1-to-1	Anc_2.663	CAGL0F06853g		1167	0	0	0.92		YKL021C	MAK11	1407	0	0.8		0.12	inviable	Protein involved in an early step of 60S ribosomal subunit biogenesis; essential for cell growth and replication of killer M1 dsRNA virus; contains four beta-transducin repeats	.
	1-to-1	Anc_5.309	CAGL0D03960g		1500	4.06667	0	0.92		YHR036W	BRL1	1416	0	0.845		0.075	inviable	Essential nuclear envelope integral membrane protein; identified as a suppressor of a conditional mutation in the major karyopherin, CRM1; homologous to and interacts with Brr6p, a nuclear envelope protein involved in nuclear export	.
	1-to-1	Anc_2.427	CAGL0K03619g		606	0	0	0.92		YMR117C	SPC24	642	0	0.875		0.045	inviable	Component of the kinetochore-associated Ndc80 complex; involved in chromosome segregation, spindle checkpoint activity, and kinetochore clustering; evolutionarily conserved; other members include Ndc80p, Nuf2p, Spc24p, and Spc25p	.
	1-to-1	Anc_4.066	CAGL0D06182g		843	0	0	0.92		YGL044C	RNA15	891	0	0.89		0.03	inviable	Component of the cleavage and polyadenylation factor I (CF I); CF 1, composed of the CF 1A complex (Rna14p, Rna15p, Clp1p, Pcf11p) and Hrp1, is involved in cleavage and polyadenylation of mRNA 3' ends; interacts with the A-rich polyadenylation signal in complex with Rna14p and Hrp1p; mutant displays reduced transcription elongation in the G-less-based run-on (GLRO) assay; required for gene looping	.
	1-to-1	Anc_5.664	CAGL0G02079g		1164	0	0	0.92		YOR063W	RPL3	1164	0	0.921208		-0.00120836	inviable	Ribosomal 60S subunit protein L3; homologous to mammalian ribosomal protein L3 and bacterial L3; involved in the replication and maintenance of killer double stranded RNA virus	.
	1-to-1	Anc_1.281	CAGL0M03113g		1872	0	0	0.92		YJL085W	EXO70	1872	0	0.943106		-0.0231058	inviable	Subunit of the exocyst complex; the exocyst mediates polarized targeting and tethering of post-Golgi secretory vesicles to active sites of exocytosis prior to SNARE-mediated fusion; PtdIns[4,5]P2-binding protein that localizes to exocytic sites in an actin-independent manner, targeting and anchoring the exocyst with Sec3p; involved in exocyst assembly; direct downstream effector of Rho3p and Cdc4…	.
	1-to-1	Anc_8.229	CAGL0L11792g		1740	0	0	0.92		YER165W	PAB1	1734	0	0.965		-0.045	inviable	Poly(A) binding protein; part of the 3'-end RNA-processing complex, mediates interactions between the 5' cap structure and the 3' mRNA poly(A) tail, involved in control of poly(A) tail length, interacts with translation factor eIF-4G	.
	1-to-1	Anc_5.645	CAGL0L10120g		3057	0	0	0.92		YOR048C	RAT1	3021	0	0.965		-0.045	inviable	Nuclear 5' to 3' single-stranded RNA exonuclease; involved in RNA metabolism, including rRNA and snRNA processing as well as poly (A+) dependent and independent mRNA transcription termination	.
	1-to-1	Anc_1.468	CAGL0I01584g		2169	0	0	0.92		YJR042W	NUP85	2235	0	0.975		-0.055	inviable	Subunit of the Nup84p subcomplex of the nuclear pore complex (NPC); contributes to nucleocytoplasmic transport and NPC biogenesis and is involved in establishment of a normal nucleocytoplasmic concentration gradient of the GTPase Gsp1p; also plays roles in several processes that may require localization of genes or chromosomes at the nuclear periphery, including double-strand break repair, transc…	.
	1-to-1	Anc_4.142	CAGL0F08679g		1188	0	0	0.92		YGR005C	TFG2	1203	0	0.975		-0.055	inviable	TFIIF (Transcription Factor II) middle subunit; involved in both transcription initiation and elongation of RNA polymerase II; homologous to human RAP30	.
	1-to-1	Anc_1.202	CAGL0M05863g		948	0	0	0.92		YKR062W	TFA2	987	0	0.99		-0.07	inviable	TFIIE small subunit; involved in RNA polymerase II transcription initiation	.
	1-to-1	Anc_4.368	CAGL0M00396g		1263	0	0	0.92		YJR136C	TTI2	1266	0	0.995		-0.075	inviable	Subunit of the ASTRA complex, involved in chromatin remodeling; telomere length regulator involved in the stability or biogenesis of PIKKs such as TORC1; similar to S. pombe Tti2p; may interact with Rsm23p; GFP-fusion protein localizes to the cytoplasm	.
	1-to-1	Anc_8.308	CAGL0D02332g		2532	0	0	0.92		YLR115W	CFT2	2580	0	1		-0.08	inviable	Subunit of the mRNA cleavage and polyadenlylation factor (CPF); required for pre-mRNA cleavage, polyadenylation and poly(A) site recognition, 43% similarity with the mammalian CPSF-100 protein.	.
	1-to-1	Anc_7.066	CAGL0E05302g		2490	0.240964	0	0.915		YOR329C	SCD5	2619	0	0.72		0.195	inviable	Protein required for normal actin organization and endocytosis; targeting subunit for protein phosphatase type 1; undergoes Crm1p-dependent nuclear-cytoplasmic shuttling; multicopy suppressor of clathrin deficiency	.
	1-to-1	Anc_5.257	CAGL0E06358g	GPM1	744	0	0	0.915		YKL152C	GPM1	744	0	0.87		0.045	inviable	Tetrameric phosphoglycerate mutase; mediates the conversion of 3-phosphoglycerate to 2-phosphoglycerate during glycolysis and the reverse reaction during gluconeogenesis	.
	1-to-1	Anc_6.011	CAGL0B03597g		1623	0	0	0.915		YEL058W	PCM1	1674	0	0.89		0.025	inviable	Essential N-acetylglucosamine-phosphate mutase; converts GlcNAc-6-P to GlcNAc-1-P, which is a precursor for the biosynthesis of chitin and for the formation of N-glycosylated mannoproteins and glycosylphosphatidylinositol anchors	.
	1-to-1	Anc_7.010	CAGL0J07260g		1917	0	0	0.915		YOR370C	MRS6	1812	0	0.935		-0.02	inviable	Rab escort protein; forms a complex with the Ras-like small GTPase Ypt1p that is required for the prenylation of Ypt1p by protein geranylgeranyltransferase type II (Bet2p-Bet4p); sequence similarity to mammalian choroideraemia gene; relative distribution to the nucleus increases upon DNA replication stress	.
	1-to-1	Anc_6.073	CAGL0F04983g		1788	0.111857	0	0.915		YLR276C	DBP9	1785	0	0.943106		-0.0281058	inviable	DEAD-box protein required for 27S rRNA processing; exhibits DNA, RNA and DNA/RNA helicase activities; ATPase activity shows preference for DNA over RNA; DNA helicase activity abolished by mutation in RNA-binding domain	.
	1-to-1	Anc_2.128	CAGL0K09790g		1578	0	0	0.915		YNL138W	SRV2	1581	0	0.943106		-0.0281058	inviable	CAP (cyclase-associated protein); N-terminus binds adenylate cyclase and facilitates activation by RAS; N-terminus forms novel hexameric star-shaped shuriken structures that directly catalyze cofilin-mediated severing of actin filaments; C-terminus, in physically and genetically separate activity, binds and recycles cofilin bound, ADP-actin monomers, facilitating regulation of actin dynamics and …	.
	1-to-1	Anc_5.067	CAGL0I02398g		1560	0	0	0.915		YHR170W	NMD3	1557	0	0.96		-0.045	inviable	Protein involved in nuclear export of the large ribosomal subunit; acts as a Crm1p-dependent adapter protein for export of nascent ribosomal subunits through the nuclear pore complex	.
	1-to-1	Anc_2.649	CAGL0L05368g		1773	0.620417	0	0.915		YKL012W	PRP40	1752	0	0.96		-0.045	inviable	U1 snRNP protein involved in splicing; interacts with the branchpoint-binding protein during the formation of the second commitment complex	.
	1-to-1	Anc_6.088	CAGL0G09669g		1167	0	0	0.915		YLR291C	GCD7	1146	0	0.97		-0.055	inviable	Beta subunit of the translation initiation factor eIF2B; the guanine-nucleotide exchange factor for eIF2; activity subsequently regulated by phosphorylated eIF2; first identified as a negative regulator of GCN4 expression	.
	1-to-1	Anc_3.149	CAGL0J11572g	NUF2	1383	0	0	0.915		YOL069W	NUF2	1356	0	0.97		-0.055	inviable	Component of the kinetochore-associated Ndc80 complex; involved in chromosome segregation, spindle checkpoint activity, and kinetochore clustering; evolutionarily conserved; other members include Ndc80p, Nuf2p, Spc24p, and Spc25p	.
	1-to-1	Anc_7.162	CAGL0H09548g		585	0	0	0.915		YER012W	PRE1	597	0	0.97		-0.055	inviable	Beta 4 subunit of the 20S proteasome; localizes to the nucleus throughout the cell cycle	.
	1-to-1	Anc_2.560	CAGL0M07700g		1461	0	0	0.915		YMR013C	SEC59	1560	0	0.985		-0.07	inviable	Dolichol kinase; catalyzes the terminal step in dolichyl monophosphate (Dol-P) biosynthesis; required for viability and for normal rates of lipid intermediate synthesis and protein N-glycosylation	.
	1-to-1	Anc_7.120	CAGL0F01199g		765	0	0	0.91		YOL038W	PRE6	765	0	0.725		0.185	inviable	Alpha 4 subunit of the 20S proteasome; may replace alpha 3 subunit (Pre9p) under stress conditions to create a more active proteasomal isoform; GFP-fusion protein relocates from cytosol to the mitochondrial surface upon oxidative stress	.
	1-to-1	Anc_7.101	CAGL0F01155g		3318	0	0	0.91		YOL034W	SMC5	3282	0	0.795		0.115	inviable	Component of the SMC5-SMC6 complex; this complex plays a key role in the removal of X-shaped DNA structures that arise between sister chromatids during DNA replication and repair; binds single-stranded DNA and has ATPase activity; S. pombe homolog forms a heterodimer with S. pombe Rad18p that is involved in DNA repair	.
	1-to-1	Anc_7.274	CAGL0M12859g		2826	0	0	0.91		YIL075C	RPN2	2838	0	0.89		0.02	inviable	Subunit of the 26S proteasome; substrate of the N-acetyltransferase Nat1p; protein abundance increases in response to DNA replication stress	.
	1-to-1	Anc_1.014	CAGL0B00506g		1251	0.479616	0	0.91		YCL052C	PBN1	1251	0	0.895		0.015	inviable	Component of glycosylphosphatidylinositol-mannosyltransferase I; essential component; required for the autocatalytic post-translational processing of the protease B precursor Prb1p; localizes to ER in lumenal orientation; homolog of mammalian PIG-X	.
	1-to-1	Anc_5.495	CAGL0F02673g		516	0	0	0.91		YDR404C	RPB7	516	0	0.905		0.005	inviable	RNA polymerase II subunit B16; forms two subunit dissociable complex with Rpb4p; involved in recruitment of 3'-end processing factors to transcribing RNA polymerase II complex and in export of mRNA to cytoplasm under stress conditions; also involved in translation initiation	.
	1-to-1	Anc_4.044	CAGL0D06556g		1662	1.38387	0	0.91		YLL018C	DPS1	1674	0	0.91		0	inviable	Aspartyl-tRNA synthetase, primarily cytoplasmic; homodimeric enzyme that catalyzes the specific aspartylation of tRNA(Asp); class II aminoacyl tRNA synthetase; binding to its own mRNA may confer autoregulation; shares five highly conserved amino acids with human that when mutated cause leukoencephalopathy characterized by hypomyelination with brain stem and spinal cord involvement and leg spastic…	.
	1-to-1	Anc_8.321	CAGL0M04235g		2352	2.29592	0	0.91		YLR127C	APC2	2562	0	0.92		-0.01	inviable	Subunit of the Anaphase-Promoting Complex/Cyclosome (APC/C); which is a ubiquitin-protein ligase required for degradation of anaphase inhibitors, including mitotic cyclins, during the metaphase/anaphase transition; component of the catalytic core of the APC/C; has similarity to cullin Cdc53p	.
	1-to-1	Anc_6.288	CAGL0H00660g		504	0	0	0.91		YPL252C	YAH1	519	0	0.921208		-0.0112084	inviable	Ferredoxin of the mitochondrial matrix; required for formation of cellular iron-sulfur proteins; involved in heme A biosynthesis; homologous to human adrenodoxin	.
	1-to-1	Anc_8.418	CAGL0F05335g		2535	0	0	0.91		YDR208W	MSS4	2340	0	0.925		-0.015	inviable	Phosphatidylinositol-4-phosphate 5-kinase; involved in actin cytoskeleton organization and cell morphogenesis; multicopy suppressor of stt4 mutation	.
	1-to-1	Anc_5.232	CAGL0J00935g		462	0	0	0.91		YLR008C	PAM18	507	0	0.93		-0.02	inviable	Subunit of the import motor (PAM complex); the PAM complex is a component of the Translocase of the Inner Mitochondrial membrane (TIM23 complex); essential J-protein cochaperone that stimulates Ssc1p ATPase activity to drive import; inhibited by Pam16p	.
	1-to-1	Anc_5.175	CAGL0B03707g		1440	0	0	0.91		YJR006W	POL31	1464	0	0.943106		-0.0331058	inviable	Subunit of DNA polymerase delta (polymerase III); essential for cell viability; involved in DNA replication and DNA repair; relocalizes to the cytosol in response to hypoxia	.
	1-to-1	Anc_5.183	CAGL0D03410g		1632	0	0	0.91		YJL025W	RRN7	1545	0	0.96		-0.05	inviable	Component of the core factor (CF) rDNA transcription factor complex; CF is required for transcription of 35S rRNA genes by RNA polymerase I and is composed of Rrn6p, Rrn7p, and Rrn11p	.
	1-to-1	Anc_5.261	CAGL0J00759g		5133	0	0	0.91		YJL039C	NUP192	5052	0	0.965		-0.055	inviable	Essential subunit of the inner ring of the nuclear pore complex (NPC); contributes to nucleocytoplasmic transport; homologous to human NUP205	.
	1-to-1	Anc_2.082	CAGL0J06248g		5295	0.169972	0	0.91		YNL172W	APC1	5247	0	0.975		-0.065	inviable	Largest subunit of the Anaphase-Promoting Complex/Cyclosome; APC/C is a ubiquitin-protein ligase required for degradation of anaphase inhibitors, including mitotic cyclins, during the metaphase/anaphase transition; component of the platform domain of the APC/C, based on structural analysis; localizes to nuclear foci that become diffuse upon DNA replication stress	.
	1-to-1	Anc_8.384	CAGL0K08404g		2469	0	0	0.91		YLR166C	SEC10	2616	0	0.985		-0.075	inviable	Essential 100kDa subunit of the exocyst complex; the exocyst mediates polarized targeting and tethering of post-Golgi secretory vesicles to active sites of exocytosis at the plasma membrane prior to SNARE-mediated fusion	.
	1-to-1	Anc_4.050	CAGL0D06446g	STT4	5709	0.578035	0	0.905		YLR305C	STT4	5703	0	0.855		0.05	inviable	Phosphatidylinositol-4-kinase; functions in the Pkc1p protein kinase pathway; required for normal vacuole morphology, cell wall integrity, and actin cytoskeleton organization	.
	1-to-1	Anc_2.592	CAGL0M13145g	CSE4	723	0	0	0.905		YKL049C	CSE4	690	0	0.906244		-0.00124419	inviable	Centromere protein that resembles histone H3; associated with promoters, accessible chromatin and RNA polymerase II-bound regions; phosphorylated Cse4p associates with centromeres; required for proper kinetochore function; levels regulated by E3 ubiquitin ligase Psh1p; phosphorylation of Cse4p may destabilize defective kinetochores to promote bi-orientation; ubiquitination of N terminus regulates…	.
	1-to-1	Anc_5.558	CAGL0G07128g		1665	0	0	0.905		YML023C	NSE5	1671	0	0.92		-0.015	inviable	Component of the SMC5-SMC6 complex; this complex plays a key role in the removal of X-shaped DNA structures that arise between sister chromatids during DNA replication and repair	.
	1-to-1	Anc_1.081	CAGL0J08228g		2259	0	0	0.905		YNL272C	SEC2	2280	0	0.92		-0.015	inviable	Guanyl-nucleotide exchange factor for the small G-protein Sec4p; essential for post-Golgi vesicle transport and for autophagy; associates with the exocyst, via exocyst subunit Sec15p, on secretory vesicles	.
	1-to-1	Anc_3.027	CAGL0E01551g		693	1.0101	0	0.905		YOL135C	MED7	669	0	0.93		-0.025	inviable	Subunit of the RNA polymerase II mediator complex; associates with core polymerase subunits to form the RNA polymerase II holoenzyme; essential for transcriptional regulation	.
	1-to-1	Anc_5.073	CAGL0I02266g		7245	0.0276052	0	0.905		YHR165C	PRP8	7242	0	0.935		-0.03	inviable	Component of U4/U6-U5 snRNP complex; involved in second catalytic step of splicing; participates in spliceosomal assembly through its interaction with U1 snRNA; mutations of human Prp8 cause retinitis pigmentosa	.
	1-to-1	Anc_3.097	CAGL0I07579g		1278	0	0	0.905		YOL097C	WRS1	1299	0	0.935		-0.03	inviable	Cytoplasmic tryptophanyl-tRNA synthetase; aminoacylates tryptophanyl-tRNA	.
	1-to-1	Anc_6.180	CAGL0H03069g		3852	0	0	0.905		YGL092W	NUP145	3954	0	0.95		-0.045	inviable	Essential protein with distinct roles in two nuclear pore subcomplexes; catalyzes its own proteolytic cleavage in vivo to generate a C-terminal fragment that is a structural component of the Nup84p subcomplex (with roles in NPC biogenesis and localization of genes to the nuclear periphery), and an N-terminal fragment that is one of several FG-nucleoporins within the NPC central core directly resp…	.
	1-to-1	Anc_1.175	CAGL0L00341g		1164	3.69416	0	0.905		YKL172W	EBP2	1284	0	0.98		-0.075	inviable	Required for 25S rRNA maturation and 60S ribosomal subunit assembly; localizes to the nucleolus and in foci along nuclear periphery; constituent of 66S pre-ribosomal particles; cooperates with Rrs1p and Mps3p to mediate telomere clustering by binding Sir4p, but is not involved in telomere tethering	.
	1-to-1	Anc_2.579	CAGL0I05456g		1365	0	0	0.9		YKL059C	MPE1	1326	0	0.695		0.205	inviable	Essential conserved subunit of CPF cleavage and polyadenylation factor; plays a role in 3' end formation of mRNA via the specific cleavage and polyadenylation of pre-mRNA, contains a putative RNA-binding zinc knuckle motif; relocalizes to the cytosol in response to hypoxia	.
	1-to-1	Anc_4.323	CAGL0M00836g		1986	3.77644	0	0.9		YLR440C	SEC39	2130	0	0.775		0.125	inviable	Component of the Dsl1p tethering complex; this complex interacts with ER SNAREs Sec20p and Use1p; proposed to be involved in protein secretion; localizes to the ER and nuclear envelope	.
	1-to-1	Anc_4.133	CAGL0A00847g		990	0	0	0.9		YLR316C	TAD3	1093	0	0.975		-0.075	inviable	Subunit of tRNA-specific adenosine-34 deaminase; forms a heterodimer with Tad2p that converts adenosine to inosine at the wobble position of several tRNAs	.
	1-to-1	Anc_8.078	CAGL0L08756g		3660	4.07104	0	0.9		YPL012W	RRP12	3687	0	0.98		-0.08	inviable	Protein required for export of the ribosomal subunits; associates with the RNA components of the pre-ribosomes; has a role in nuclear import in association with Pse1p; contains HEAT-repeats	.
	1-to-1	Anc_6.130	CAGL0F07095g		1596	0	0	0.895		YGL122C	NAB2	1578	2.40811	0.825		0.07	inviable	Nuclear polyadenylated RNA-binding protein; required for nuclear mRNA export and poly(A) tail length control; binds nuclear pore protein Mlp1p; involved in forming export-competent mRNPs in the nucleus; autoregulates mRNA levels; related to human hnRNPs; nuclear localization sequence binds Kap104p; protein abundance increases in response to DNA replication stress	.
	1-to-1	Anc_7.448	CAGL0K05335g		1590	0	0	0.895		YPR034W	ARP7	1434	0	0.98		-0.085	inviable	Component of both the SWI/SNF and RSC chromatin remodeling complexes; actin-related protein involved in transcriptional regulation	.
	1-to-1	Anc_2.246	CAGL0J10010g		1422	1.54712	0	0.89		YNL062C	GCD10	1437	0	0.63		0.26	inviable	Subunit of tRNA (1-methyladenosine) methyltransferase with Gcd14p; required for the modification of the adenine at position 58 in tRNAs, especially tRNAi-Met; first identified as a negative regulator of GCN4 expression	.
	1-to-1	Anc_2.636	CAGL0L05170g		1362	0	0	0.89		YKL082C	RRP14	1305	0	0.71		0.18	inviable	Essential protein, constituent of 66S pre-ribosomal particles; interacts with proteins involved in ribosomal biogenesis and cell polarity; member of the SURF-6 family	.
	1-to-1	Anc_2.122	CAGL0J05698g		705	0	0	0.89		YNL151C	RPC31	756	0	0.83		0.06	inviable	RNA polymerase III subunit C31	.
	1-to-1	Anc_6.259	CAGL0E06182g		642	0	0	0.89		YPL233W	NSL1	651	0	0.885		0.005	inviable	Essential component of the MIND kinetochore complex; joins kinetochore subunits contacting DNA to those contacting microtubules; required for accurate chromosome segregation; complex consists of Mtw1p Including Nnf1p-Nsl1p-Dsn1p (MIND)	.
	1-to-1	Anc_8.367	CAGL0B02717g		2052	0	0	0.89		YLR153C	ACS2	2052	0	0.895		-0.005	inviable	Acetyl-coA synthetase isoform; along with Acs1p, acetyl-coA synthetase isoform is the nuclear source of acetyl-coA for histone acetylation; mutants affect global transcription; required for growth on glucose; expressed under anaerobic conditions	.
	1-to-1	Anc_8.620	CAGL0J06842g		1515	0	0	0.89		YPL122C	TFB2	1542	0	0.925		-0.035	inviable	Subunit of TFIIH and nucleotide excision repair factor 3 complexes; involved in transcription initiation, required for nucleotide excision repair, similar to 52 kDa subunit of human TFIIH	.
	1-to-1	Anc_5.580	CAGL0K06369g		993	0	0	0.89		YDR460W	TFB3	966	0	0.935		-0.045	inviable	Subunit of TFIIH and nucleotide excision repair factor 3 complexes; involved in transcription initiation, required for nucleotide excision repair; ring finger protein similar to mammalian CAK and TFIIH subunit	.
	1-to-1	Anc_3.212	CAGL0C04433g		1752	0.513699	0	0.89		YDL003W	MCD1	1701	0	0.94		-0.05	inviable	Essential alpha-kleisin subunit of the cohesin complex; required for sister chromatid cohesion in mitosis and meiosis; apoptosis induces cleavage and translocation of a C-terminal fragment to mitochondria; expression peaks in S phase	.
	1-to-1	Anc_7.201	CAGL0I05302g		3282	1.26447	0	0.89		YIL026C	IRR1	3453	0	0.95		-0.06	inviable	Subunit of the cohesin complex; which is required for sister chromatid cohesion during mitosis and meiosis and interacts with centromeres and chromosome arms; relocalizes to the cytosol in response to hypoxia; essential for viability	.
	1-to-1	Anc_4.063	CAGL0E03223g		747	0	0	0.89		YGR158C	MTR3	753	0	0.965		-0.075	inviable	Exosome non-catalytic core component; involved in 3'-5' RNA processing and degradation in both the nucleus and the cytoplasm; has similarity to E. coli RNase PH and to human hMtr3p (EXOSC6)	.
	1-to-1	Anc_4.190	CAGL0B03047g	ILV5	1200	0	0	0.885		YLR355C	ILV5	1188	0	0.515		0.37	inviable	Acetohydroxyacid reductoisomerase and mtDNA binding protein; involved in branched-chain amino acid biosynthesis and maintenance of wild-type mitochondrial DNA; found in mitochondrial nucleoids	.
	1-to-1	Anc_5.185	CAGL0D05940g	ERG1	1470	0	0	0.885		YGR175C	ERG1	1491	0	0.762101		0.122899	inviable	Squalene epoxidase; catalyzes the epoxidation of squalene to 2,3-oxidosqualene; plays an essential role in the ergosterol-biosynthesis pathway and is the specific target of the antifungal drug terbinafine	.
	1-to-1	Anc_4.085	CAGL0A01540g		481	4.7817	0	0.885		YGL030W	RPL30	548	0	0.78		0.105	inviable	Ribosomal 60S subunit protein L30; involved in pre-rRNA processing in the nucleolus; autoregulates splicing of its transcript; homologous to mammalian ribosomal protein L30, no bacterial homolog	.
	1-to-1	Anc_3.150	CAGL0K01441g		792	0	0	0.885		YDL043C	PRP11	801	0	0.906244		-0.0212442	inviable	Subunit of the SF3a splicing factor complex; required for spliceosome assembly	.
	1-to-1	Anc_5.075	CAGL0I02222g		4539	0	0	0.885		YHR164C	DNA2	4569	0	0.99		-0.105	inviable	Tripartite DNA replication factor; has single-stranded DNA-dependent ATPase, ATP-dependent nuclease, and helicase activities; tracking protein for flap cleavage during Okazaki fragment maturation; involved in DNA repair and processing of meiotic DNA double strand breaks; required for normal life span; component of telomeric chromatin, with cell-cycle dependent localization; required for telomeras…	.
	1-to-1	Anc_3.162	CAGL0K01617g		2325	0.258065	0	0.88		YDL028C	MPS1	2295	0	0.695		0.185	inviable	Dual-specificity kinase; autophosphorylation required for its function; required for spindle pole body (SPB) duplication and spindle checkpoint function; substrates include SPB proteins Spc42p, Spc110p, and Spc98p, mitotic exit network protein Mob1p, kinetochore protein Cnn1p, and checkpoint protein Mad1p; similar to human Mps1p	.
	1-to-1	Anc_5.142	CAGL0K01001g		2367	0.0844951	0	0.88		YGR198W	YPP1	2454	0	0.86		0.02	inviable	Cargo-transport protein involved in endocytosis; interacts with phosphatidylinositol-4-kinase Stt4p; is required, along with Efr3p, for the assembly and recruitment of multiple copies of the kinase into phosphoinositide kinase (PIK) patches at the plasma membrane; positively regulates Stt4p; GFP-fusion protein localizes to the cytoplasm; YGR198W is an essential gene	.
	1-to-1	Anc_2.326	CAGL0H10384g		795	0	0	0.88		YDL111C	RRP42	798	0	0.875		0.005	inviable	Exosome non-catalytic core component; involved in 3'-5' RNA processing and degradation in both the nucleus and the cytoplasm; has similarity to E. coli RNase PH and to human hRrp42p (EXOSC7)	.
	1-to-1	Anc_1.063	CAGL0J08393g		2160	0	0	0.88		YDR499W	LCD1	2244	0	0.9		-0.02	inviable	Essential protein required for the DNA integrity checkpoint pathways; interacts physically with Mec1p; putative homolog of S. pombe Rad26 and human ATRIP; forms nuclear foci upon DNA replication stress	.
	1-to-1	Anc_1.493	CAGL0L01441g		1818	0	0	0.88		YML046W	PRP39	1890	0	0.905		-0.025	inviable	U1 snRNP protein involved in splicing; contains multiple tetriatricopeptide repeats	.
	1-to-1	Anc_5.674	CAGL0L10516g		1050	0	0	0.88		YKR081C	RPF2	1035	0	0.925		-0.045	inviable	Essential protein involved in rRNA maturation and ribosomal assembly; involved in the processing of pre-rRNA and the assembly of the 60S ribosomal subunit; interacts with ribosomal protein L11; localizes predominantly to the nucleolus; constituent of 66S pre-ribosomal particles	.
	1-to-1	Anc_7.194	CAGL0J02420g		939	0	0	0.88		YIL021W	RPB3	957	0	0.95		-0.07	inviable	RNA polymerase II third largest subunit B44; part of central core; similar to prokaryotic alpha subunit	.
	1-to-1	Anc_4.365	CAGL0D02706g		2304	0	0	0.88		YHR197W	RIX1	2292	0	0.975		-0.095	inviable	Component of the Rix1 complex and possibly pre-replicative complexes; required for processing of ITS2 sequences from 35S pre-rRNA; component of the pre-60S ribosomal particle with the dynein-related AAA-type ATPase Mdn1p; required for pre-replicative complex (pre-RC) formation and maintenance during DNA replication licensing; relocalizes to the cytosol in response to hypoxia; essential gene	.
	1-to-1	Anc_3.036	CAGL0M03949g		576	10.5903	0	0.875		YNL310C	ZIM17	525	0	0.7		0.175	inviable	Heat shock protein with a zinc finger motif; essential for protein import into mitochondria; may act with Pam18p to facilitate recognition and folding of imported proteins by Ssc1p (mtHSP70) in the mitochondrial matrix	.
	1-to-1	Anc_6.324	CAGL0K09306g		1593	0	0	0.875		YCR054C	CTR86	1692	0	0.845		0.03	inviable	Essential protein of unknown function; with orthologs in Ashbya gossypii and Candida albicans; similar to human ATXN10, mutations in which cause spinocerebellar ataxia type 10; codon usage corresponds to that observed for yeast genes expressed at low levels; relative distribution to the nucleus increases upon DNA replication stress	.
	1-to-1	Anc_4.275	CAGL0M09845g		2817	0.266241	0	0.875		YLR409C	UTP21	2820	0	0.865		0.01	inviable	Subunit of U3-containing 90S preribosome and SSU processome complexes; involved in production of 18S rRNA and assembly of small ribosomal subunit; synthetic defect with STI1 Hsp90 cochaperone; human homolog linked to glaucoma; Small Subunit processome is also known as SSU processome	.
	1-to-1	Anc_8.310	CAGL0D02376g		2088	0	0	0.875		YLR117C	CLF1	2064	0	0.895		-0.02	inviable	Member of the NineTeen Complex (NTC); this complex contains Prp19p and stabilizes U6 snRNA in catalytic forms of the spliceosome containing U2, U5, and U6 snRNAs; homolog of Drosophila crooked neck protein; interacts with U1 snRNP proteins	.
	1-to-1	Anc_1.104	CAGL0J07920g		2424	0	0	0.875		YNL256W	FOL1	2475	0	0.915		-0.04	inviable	Multifunctional enzyme of the folic acid biosynthesis pathway; has dihydropteroate synthetase, dihydro-6-hydroxymethylpterin pyrophosphokinase, and dihydroneopterin aldolase activities	.
	1-to-1	Anc_5.428	CAGL0A02750g		1290	0	0	0.875		YOR117W	RPT5	1305	0	0.99		-0.115	inviable	ATPase of the 19S regulatory particle of the 26S proteasome; one of six ATPases of the regulatory particle; involved in the degradation of ubiquitinated substrates; recruited to the GAL1-10 promoter region upon induction of transcription; similar to human TBP1	.
	1-to-1	Anc_8.010	CAGL0K12826g		666	0	0	0.87		YLR075W	RPL10	666	0	0.66		0.21	inviable	Ribosomal 60S subunit protein L10; responsible for joining the 40S and 60S subunits; regulates translation initiation; similar to members of the QM gene family; homologous to mammalian ribosomal protein L10 and bacterial L16; protein abundance increases in response to DNA replication stress; mutations in the human ortholog are associated with development of T-cell acute lymphoblastic leukemia and…	.
	1-to-1	Anc_3.301	CAGL0E04598g	CDC34	888	0	0	0.87		YDR054C	CDC34	888	0	0.915		-0.045	inviable	Ubiquitin-conjugating enzyme (E2); catalytic subunit of SCF ubiquitin-protein ligase complex (together with Skp1p, Rbx1p, Cdc53p, and an F-box protein) that regulates cell cycle progression by targeting key substrates for degradation; protein abundance increases in response to DNA replication stress	.
	1-to-1	Anc_8.082	CAGL0L08866g		1758	0	0	0.87		YPL007C	TFC8	1767	0	0.935		-0.065	inviable	Subunit of RNA polymerase III transcription initiation factor complex; one of six subunits of RNA polymerase III transcription initiation factor complex (TFIIIC); part of TFIIIC TauB domain that binds BoxB promoter sites of tRNA and other genes; linker between TauB and TauA domains; human homolog is TFIIIC-90	.
	1-to-1	Anc_2.504	CAGL0M10235g		282	0	0	0.865		YKL006C-A	SFT1	435	0	0.65		0.215	inviable	Intra-Golgi v-SNARE; required for transport of proteins between an early and a later Golgi compartment	.
	1-to-1	Anc_2.065	CAGL0G05654g		582	0	0	0.865		YDL217C	TIM22	624	0	0.875		-0.01	inviable	Essential core component of the mitochondrial TIM22 complex; involved in insertion of polytopic proteins into the inner membrane; forms the channel through which proteins are imported	.
	1-to-1	Anc_1.497	CAGL0L01507g		3891	0	0	0.865		YML049C	RSE1	4086	0	0.965		-0.1	inviable	Protein involved in pre-mRNA splicing; component of the pre-spliceosome; associates with U2 snRNA; involved in ER to Golgi transport	.
	1-to-1	Anc_8.351	CAGL0E01001g		2091	2.24773	0	0.865		YDR164C	SEC1	2175	0	0.995		-0.13	inviable	Sm-like protein involved in docking and fusion of exocytic vesicles; binds to assembled SNARE complexes at the membrane and stimulates membrane fusion; localization to sites of secretion (bud neck and bud tip) is dependent on SNARE function; interacts directly with essential exocyst subunit Sec6p	.
	1-to-1	Anc_4.091	CAGL0E02893g		2793	0	0	0.86		YBL014C	RRN6	2685	0	0.72		0.14	inviable	Component of the core factor (CF) rDNA transcription factor complex; CF is required for transcription of 35S rRNA genes by RNA polymerase I and is composed of Rrn6p, Rrn7p, and Rrn11p	.
	1-to-1	Anc_7.464	CAGL0M09064g		984	0	0	0.86		YJR093C	FIP1	984	0	0.795		0.065	inviable	Subunit of cleavage polyadenylation factor (CPF); interacts directly with poly(A) polymerase (Pap1p) to regulate its activity; bridging factor that links Pap1p and the CPF complex via Yth1p	.
	1-to-1	Anc_2.249	CAGL0G08558g		684	0	0	0.86		YIL118W	RHO3	696	0	0.943106		-0.0831058	inviable	Non-essential small GTPase of the Rho/Rac family of Ras-like proteins; involved in the establishment of cell polarity; GTPase activity positively regulated by the GTPase activating protein (GAP) Rgd1p	.
	1-to-1	Anc_1.504	CAGL0H01881g		663	0	0	0.859282		YJR057W	CDC8	651	0	0.66		0.199282	inviable	Thymidylate and uridylate kinase; functions in de novo biosynthesis of pyrimidine deoxyribonucleotides; converts dTMP to dTDP and dUMP to dUTP; essential for mitotic and meiotic DNA replication; homologous to S. pombe Tmp1p	.
	1-to-1	Anc_2.340	CAGL0F07755g	CEP3	1836	0	0	0.859282		YMR168C	CEP3	1827	0	0.7		0.159282	inviable	Essential kinetochore protein; component of the CBF3 complex that binds the CDEIII region of the centromere; contains an N-terminal Zn2Cys6 type zinc finger domain, a C-terminal acidic domain, and a putative coiled coil dimerization domain	.
	1-to-1	Anc_7.479	CAGL0F04455g		657	0	0	0.859282		YBL040C	ERD2	757	0	0.735		0.124282	inviable	HDEL receptor; an integral membrane protein that binds to the HDEL motif in proteins destined for retention in the endoplasmic reticulum; has a role in maintenance of normal levels of ER-resident proteins	.
	1-to-1	Anc_1.064	CAGL0B01232g	EMG1	690	27.1739	27.1739	0.859282		YLR186W	EMG1	759	0	0.89		-0.0307177	inviable	Methyltransferase for rRNA; catalyzes methylation of the pseudouridine residue 1191 of 18S rRNA; member of the SPOUT methyltransferase family; required for maturation of 18S rRNA and for 40S ribosomal subunit production independently of methyltransferase activity; forms homodimers; human ortholog is mutated in Bowen-Conradi syndrome, and the equivalent mutation in yeast affects Emg1p dimerization…	.
	1-to-1	Anc_8.465	CAGL0J09614g		435	2.06897	0	0.859282		YDL208W	NHP2	471	0	0.91		-0.0507177	inviable	Protein related to mammalian high mobility group (HMG) proteins; nuclear protein; essential for function of H/ACA-type snoRNPs, which are involved in 18S rRNA processing	.
	1-to-1	Anc_7.538	CAGL0H00220g		1227	0	0	0.859282		YLR459W	GAB1	1185	0	0.915		-0.0557177	inviable	GPI transamidase subunit; involved in attachment of glycosylphosphatidylinositol (GPI) anchors to proteins; may have a role in recognition of the attachment signal or of the lipid portion of GPI	.
	1-to-1	Anc_2.087	CAGL0G05874g		213	0	0	0.859282		YHR143W-A	RPC10	213	0	0.921208		-0.0619261	inviable	RNA polymerase subunit ABC10-alpha, found in RNA pol I, II, and III; relocalizes from nucleolus to cytoplasm upon DNA replication stress	.
	1-to-1	Anc_3.001	CAGL0B01331g		621	0	0	0.859282		YOL149W	DCP1	696	0	0.943106		-0.0838236	inviable	Subunit of the Dcp1p-Dcp2p decapping enzyme complex; decapping complex removes the 5' cap structure from mRNAs prior to their degradation; enhances the activity of catalytic subunit Dcp2p; regulated by DEAD box protein Dhh1p; forms cytoplasmic foci upon DNA replication stress	.
	1-to-1	Anc_1.139	CAGL0L08206g		1221	0	0	0.859282		YCR035C	RRP43	1185	0	0.95		-0.0907177	inviable	Exosome non-catalytic core component; involved in 3'-5' RNA processing and degradation in both the nucleus and the cytoplasm; has similarity to E. coli RNase PH and to human hRrp43p (OIP2, EXOSC8); protein abundance increases in response to DNA replication stress	.
	1-to-1	Anc_5.572	CAGL0K06281g		558	0	0	0.859282		YDR454C	GUK1	564	0	0.97		-0.110718	inviable	Guanylate kinase; converts GMP to GDP; required for growth and mannose outer chain elongation of cell wall N-linked glycoproteins	.
	1-to-1	Anc_6.291	CAGL0H00594g		1362	0	0	0.859282		YPL255W	BBP1	1158	0	0.975		-0.115718	inviable	Protein required for the spindle pole body (SPB) duplication; localizes at the cytoplasmic side of the central plaque periphery of the SPB; forms a complex with a nuclear envelope protein Mps2p and SPB components Spc29p and Kar1p; required for mitotic functions of Cdc5p	.
	1-to-1	Anc_3.230	CAGL0I04752g		1296	3.7037	0	0.859282		YBR029C	CDS1	1374	0	0.98		-0.120718	inviable	Phosphatidate cytidylyltransferase (CDP-diglyceride synthetase); an enzyme that catalyzes that conversion of CTP + phosphate into diphosphate + CDP-diaclglyerol, a critical step in the synthesis of all major yeast phospholipids	.
	1-to-1	Anc_7.095	CAGL0F01045g		432	0	0	0.859282		YOL040C	RPS15	429	0	0.999545		-0.140263	inviable	Protein component of the small (40S) ribosomal subunit; homologous to mammalian ribosomal protein S15 and bacterial S19	.
	1-to-1	Anc_3.096	CAGL0I07557g		639	0.156495	0	0.855		YDR487C	RIB3	627	0	0.765		0.09	inviable	3,4-dihydroxy-2-butanone-4-phosphate synthase (DHBP synthase); required for riboflavin biosynthesis from ribulose-5-phosphate, also has an unrelated function in mitochondrial respiration	.
	1-to-1	Anc_2.528	CAGL0L02057g		1401	0	0	0.855		YKL028W	TFA1	1449	0	0.795		0.06	inviable	TFIIE large subunit; involved in recruitment of RNA polymerase II to the promoter, activation of TFIIH, and promoter opening	.
	1-to-1	Anc_6.179	CAGL0H03047g		2226	0	0	0.855		YGL093W	SPC105	2754	0	0.875		-0.02	inviable	Subunit of a kinetochore-microtubule binding complex; complex bridges centromeric heterochromatin and kinetochore MAPs and motors; required for sister chromatid bi-orientation and kinetochore binding of SAC components; complex also includes Kre28p	.
	1-to-1	Anc_5.037	CAGL0F08503g		738	0	0	0.855		YGR267C	FOL2	732	0	0.9		-0.045	inviable	GTP-cyclohydrolase I; catalyzes the first step in the folic acid biosynthetic pathway	.
	1-to-1	Anc_2.137	CAGL0K09592g		438	0	0	0.855		YNL131W	TOM22	459	0	0.935		-0.08	inviable	Component of the TOM (Translocase of Outer Membrane) complex; responsible for initial import of mitochondrially directed proteins; mediates interaction between TOM and TIM complexes and acts as a receptor for precursor proteins	.
	1-to-1	Anc_7.147	CAGL0J02244g		1290	0	0	0.855		YER003C	PMI40	1383	0	0.943106		-0.0881058	inviable	Mannose-6-phosphate isomerase; catalyzes the interconversion of fructose-6-P and mannose-6-P; required for early steps in protein mannosylation	.
	1-to-1	Anc_8.047	CAGL0K12386g		2466	0.0405515	0	0.85		YFL024C	EPL1	2499	0	0.94		-0.09	inviable	Subunit of NuA4, an essential histone H4/H2A acetyltransferase complex; conserved region at N-terminus is essential for interaction with the NPC (nucleosome core particle); required for autophagy; homologous to Drosophila Enhancer of Polycomb; coding sequence contains length polymorphisms in different strains	.
	1-to-1	Anc_5.536	CAGL0H04675g		825	1.75758	0	0.85		YDR429C	TIF35	825	0	0.945		-0.095	inviable	eIF3g subunit of the eukaryotic translation initiation factor 3 (eIF3); subunit of the core complex of eIF3; is essential for translation; stimulates resumption of ribosomal scanning during translation reinitiation	.
	1-to-1	Anc_2.332	CAGL0H10318g		924	0	0	0.85		YDL108W	KIN28	1002	0	0.96		-0.11	inviable	Serine/threonine protein kinase, subunit of transcription factor TFIIH; involved in transcription initiation at RNA polymerase II promoters; relocalizes to the cytosol in response to hypoxia	.
	1-to-1	Anc_6.228	CAGL0I09570g		1350	0	0	0.85		YGL130W	CEG1	1380	0	0.975		-0.125	inviable	Alpha (guanylyltransferase) subunit of the mRNA capping enzyme; a heterodimer (the other subunit is CET1, an RNA 5'-triphosphatase) involved in adding the 5' cap to mRNA; the mammalian enzyme is a single bifunctional polypeptide	.
	1-to-1	Anc_6.163	CAGL0J05412g		1920	0.0520833	0	0.845		YGL099W	LSG1	1923	0	0.855		-0.01	inviable	Putative GTPase involved in 60S ribosomal subunit biogenesis; required for the release of Nmd3p from 60S subunits in the cytoplasm	.
	1-to-1	Anc_3.429	CAGL0G03025g		1440	0	0	0.845		YGR091W	PRP31	1485	0	0.905		-0.06	inviable	Splicing factor; component of the U4/U6-U5 snRNP complex	.
	1-to-1	Anc_5.017	CAGL0G00352g		876	0	0	0.845		YGR277C	CAB4	918	0	0.945		-0.1	inviable	Subunit of the CoA-Synthesizing Protein Complex (CoA-SPC); subunits of this complex are: Cab2p, Cab3p, Cab4p, Cab5p, Sis2p and Vhs3p; probable pantetheine-phosphate adenylyltransferase (PPAT); PPAT catalyzes the fourth step in the biosynthesis of coenzyme A from pantothenate; null mutant lethality is complemented by E. coli coaD (encoding PPAT); widely conserved	.
	1-to-1	Anc_2.460	CAGL0J01177g		1440	0	0	0.845		YKL112W	ABF1	2196	0	0.96		-0.115	inviable	DNA binding protein with possible chromatin-reorganizing activity; involved in transcriptional activation, gene silencing, and DNA replication and repair	.
	1-to-1	Anc_3.081	CAGL0I02970g		1314	0	0	0.845		YNL280C	ERG24	1317	0	0.96		-0.115	inviable	C-14 sterol reductase; acts in ergosterol biosynthesis; mutants accumulate the abnormal sterol ignosterol (ergosta-8,14 dienol), and are viable under anaerobic growth conditions but inviable on rich medium under aerobic conditions	.
	1-to-1	Anc_2.029	CAGL0K04917g	RAP1	2064	1.01744	0	0.845		YNL216W	RAP1	2484	0	0.99		-0.145	inviable	Essential DNA-binding transcription regulator that binds many loci; involved in transcription activation and repression, chromatin silencing, and telomere length maintenance; relocalizes to the cytosol in response to hypoxia; conserved protein with an N-terminal BRCT domain, a central region with homology to the Myb DNA binding domain, and a C-terminal Rap1-specific protein-interaction domain (RC…	.
	1-to-1	Anc_5.181	CAGL0G04191g		948	0	0	0.84		YGR179C	OKP1	1221	0	0.59		0.25	inviable	Outer kinetochore protein required for accurate chromosome segregation; component of COMA (Ctf19p, Okp1p, Mcm21p, Ame1p) a kinetochore sub-complex which functions as a platform for kinetochore assembly; orthologous to human centromere constitutive-associated network (CCAN) subunit CENP-Q and fission yeast fta7	.
	1-to-1	Anc_1.262	CAGL0L03025g		726	0	0	0.84		YKR025W	RPC37	849	0	0.875		-0.035	inviable	RNA polymerase III subunit C37	.
	1-to-1	Anc_7.163	CAGL0H09526g		3408	0	0	0.84		YER013W	PRP22	3438	0	0.885		-0.045	inviable	DEAH-box RNA-dependent ATPase/ATP-dependent RNA helicase; associates with lariat intermediates before the second catalytic step of splicing; mediates ATP-dependent mRNA release from the spliceosome and unwinds RNA duplexes; required for proofreading the exon ligation reaction	.
	1-to-1	Anc_5.226	CAGL0G04059g		1320	2.12121	0	0.84		YLR005W	SSL1	1386	0	0.921208		-0.0812084	inviable	Subunit of the core form of RNA polymerase transcription factor TFIIH; has both protein kinase and DNA-dependent ATPase/helicase activities; essential for transcription and nucleotide excision repair; interacts with Tfb4p	.
	1-to-1	Anc_3.549	CAGL0C02101g		594	2.77778	0	0.84		YFR042W	KEG1	603	0	0.943106		-0.103106	inviable	Integral membrane protein of the ER; physically interacts with Kre6p; has a role in the synthesis of beta-1,6-glucan in the cell wall; required for cell viability	.
	1-to-1	Anc_1.200	CAGL0M05885g		1467	0	0	0.84		YKR063C	LAS1	1509	0	0.96		-0.12	inviable	Protein required for pre-rRNA processing at both ends of ITS2; functions with Grc3p in a conserved mechanism to modulate rRNA processing and ribosome biogenesis; may coordinate the action of the Rat1p-Rai1p exoRNAse; required for the G1/S cell cycle transition; human ortholog is Las1L; mutants require the SSD1-v allele for viability	.
	1-to-1	Anc_5.332	CAGL0D03740g		885	0	0	0.835		YHR062C	RPP1	882	0	0.84		-0.005	inviable	Subunit of both RNase MRP and nuclear RNase P; RNase MRP cleaves pre-rRNA, while nuclear RNase P cleaves tRNA precursors to generate mature 5' ends and facilitates turnover of nuclear RNAs; relocalizes to the cytosol in response to hypoxia	.
	1-to-1	Anc_5.538	CAGL0H04697g		3033	2.4728	0	0.835		YML010W	SPT5	3192	0	0.88		-0.045	inviable	Component of the universally conserved Spt4/5 complex (DSIF complex); the complex has multiple roles in concert with RNA polymerases I and II, including regulation of transcription elongation, RNA processing, quality control, and transcription-coupled DNA repair	.
	1-to-1	Anc_4.057	CAGL0D06292g		1203	0.914381	0	0.835		YGL048C	RPT6	1218	0	0.91		-0.075	inviable	ATPase of the 19S regulatory particle of the 26S proteasome; one of six ATPases of the regulatory particle; involved in the degradation of ubiquitinated substrates; bound by ubiquitin-protein ligases Ubr1p and Ufd4p; localized mainly to the nucleus throughout the cell cycle; protein abundance increases in response to DNA replication stress	.
	1-to-1	Anc_5.329	CAGL0J11022g		660	0	0	0.835		YDR308C	SRB7	423	0	0.925		-0.09	inviable	Subunit of the RNA polymerase II mediator complex; associates with core polymerase subunits to form the RNA polymerase II holoenzyme; essential for transcriptional regulation; target of the global repressor Tup1p	.
	1-to-1	Anc_8.360	CAGL0E00935g		657	11.4155	0	0.835		YDR167W	TAF10	621	0	0.925		-0.09	inviable	Subunit (145 kDa) of TFIID and SAGA complexes; involved in RNA polymerase II transcription initiation and in chromatin modification	.
	1-to-1	Anc_2.539	CAGL0J01507g		3804	0.460042	0	0.835		YMR076C	PDS5	3834	0	0.93		-0.095	inviable	Protein involved in sister chromatid condensation and cohesion; colocalizes with cohesin on chromosomes, may function as a protein-protein interaction scaffold; also required during meiosis; relocalizes to the cytosol in response to hypoxia	.
	1-to-1	Anc_3.114	CAGL0I07799g		648	0	0	0.83		YBR154C	RPB5	648	0	0.95		-0.12	inviable	RNA polymerase subunit ABC27; common to RNA polymerases I, II, and III; contacts DNA and affects transactivation	.
	1-to-1	Anc_7.052	CAGL0E05478g		915	0	0	0.83		YOR340C	RPA43	981	0	0.965		-0.135	inviable	RNA polymerase I subunit A43	.
	1-to-1	Anc_3.177	CAGL0C05005g		3231	3.03312	0	0.83		YAR019C	CDC15	2925	0	0.985		-0.155	inviable	Protein kinase of the Mitotic Exit Network; localized to the spindle pole bodies at late anaphase; promotes mitotic exit by directly switching on the kinase activity of Dbf2p; required for spindle disassembly after meiosis II; relocalizes to the cytoplasm upon DNA replication stress	.
	1-to-1	Anc_5.192	CAGL0H09372g		1179	0	0	0.825		YGR185C	TYS1	1185	0	0.905		-0.08	inviable	Cytoplasmic tyrosyl-tRNA synthetase; required for cytoplasmic protein synthesis; interacts with positions 34 and 35 of the tRNATyr anticodon; mutations in human ortholog YARS are associated with Charcot-Marie-Tooth (CMT) neuropathies; protein abundance increases in response to DNA replication stress	.
	1-to-1	Anc_6.046	CAGL0J11792g		1533	0	0	0.825		YML043C	RRN11	1524	0	0.93		-0.105	inviable	Component of the core factor (CF) rDNA transcription factor complex; CF is required for transcription of 35S rRNA genes by RNA polymerase I and is composed of Rrn6p, Rrn7p, and Rrn11p	.
	1-to-1	Anc_4.002	CAGL0E04048g	COF1	908	0	0	0.825		YLL050C	COF1	611	0	0.935		-0.11	inviable	Cofilin, involved in pH-dependent actin filament depolarization; binds both actin monomers and filaments and severs filaments; involved in the selective sorting, export of the secretory cargo from the late golgi; genetically interacts with pmr1; thought to be regulated by phosphorylation at SER4; ubiquitous and essential in eukaryotes	.
	1-to-1	Anc_4.128	CAGL0A00803g		3489	0.659215	0	0.825		YAL001C	TFC3	3573	0	0.965		-0.14	inviable	Subunit of RNA polymerase III transcription initiation factor complex; part of the TauB domain of TFIIIC that binds DNA at the BoxB promoter sites of tRNA and similar genes; cooperates with Tfc6p in DNA binding; largest of six subunits of the RNA polymerase III transcription initiation factor complex (TFIIIC)	.
	1-to-1	Anc_1.523	CAGL0K00429g		1149	0	0	0.82		YJR072C	NPA3	1158	0	0.9		-0.08	inviable	Member of the conserved GPN-loop GTPase family; has a role in transport of RNA polymerase II to the nucleus; exhibits GTP-dependent binding to PolII; has ATPase activity; involved in sister chromatid cohesion; phosphorylated by the Pcl1p-Pho85p kinase complex; human homolog XAB1 interacts with human RNA polymerase II; protein abundance increases in response to DNA replication stress	.
	1-to-1	Anc_7.348	CAGL0I03366g		639	0.0782473	0	0.82		YDL166C	FAP7	594	0	0.935		-0.115	inviable	Essential NTPase required for small ribosome subunit synthesis; mediates processing of the 20S pre-rRNA at site D in the cytoplasm but associates only transiently with 43S preribosomes via Rps14p, may be the endonuclease for site D	.
	1-to-1	Anc_8.709	CAGL0K08888g		1605	0	0	0.82		YOR260W	GCD1	1737	0	0.985		-0.165	inviable	Gamma subunit of the translation initiation factor eIF2B; the guanine-nucleotide exchange factor for eIF2; activity subsequently regulated by phosphorylated eIF2; first identified as a negative regulator of GCN4 expression	.
	1-to-1	Anc_4.078	CAGL0A01672g		2085	0	0	0.82		YGR009C	SEC9	1956	0	0.989375		-0.169375	inviable	t-SNARE protein required for secretory vesicle-plasma membrane fusion; similar to but not functionally redundant with Spo20p; interacts non-exocyst bound Sec6p; SNAP-25 homolog	.
	1-to-1	Anc_8.122	CAGL0K02431g		2775	2.48649	0	0.815		YPR019W	MCM4	2802	0	0.615		0.2	inviable	Essential helicase component of heterohexameric MCM2-7 complexes; MCM2-7 complexes bind pre-replication complexes on DNA and melt DNA prior to replication; forms an Mcm4p-6p-7p subcomplex; shows nuclear accumulation in G1; homolog of S. pombe Cdc21p	.
	1-to-1	Anc_8.221	CAGL0M11110g		813	0	0	0.81		YDR087C	RRP1	837	0	0.84		-0.03	inviable	Essential evolutionarily conserved nucleolar protein; necessary for biogenesis of 60S ribosomal subunits and for processing of pre-rRNAs to mature rRNA; associated with several distinct 66S pre-ribosomal particles	.
	1-to-1	Anc_2.469	CAGL0J01265g		1554	0.353925	0	0.81		YMR093W	UTP15	1542	0	0.965		-0.155	inviable	Nucleolar protein; component of the small subunit (SSU) processome containing the U3 snoRNA that is involved in processing of pre-18S rRNA	.
	1-to-1	Anc_7.380	CAGL0I04950g		4320	0	0	0.805		YER093C	TSC11/AVO3	4293	0	0.52		0.285	inviable	Subunit of TORC2 (Tor2p-Lst8p-Avo1-Avo2-Tsc11p-Bit61p); TORC2 is a membrane-associated complex that regulates actin cytoskeletal dynamics during polarized growth and cell wall integrity; involved in sphingolipid metabolism; contains a RasGEFN domain	.
	1-to-1	Anc_8.479	CAGL0L12364g	ERG10	1197	0	0	0.805		YPL028W	ERG10	1197	0	0.985		-0.18	inviable	Acetyl-CoA C-acetyltransferase (acetoacetyl-CoA thiolase); cytosolic enzyme that transfers an acetyl group from one acetyl-CoA molecule to another, forming acetoacetyl-CoA; involved in the first step in mevalonate biosynthesis	.
	1-to-1	Anc_8.057	CAGL0D02150g		231	5.19481	0	0.8		YFL017W-A	SMX2	234	0	0.86		-0.06	inviable	Core Sm protein Sm G; part of heteroheptameric complex (with Smb1p, Smd1p, Smd2p, Smd3p, Sme1p, and Smx3p) that is part of the spliceosomal U1, U2, U4, and U5 snRNPs; homolog of human Sm G	.
	1-to-1	Anc_5.206	CAGL0D03168g		6249	0.0800128	0	0.795		YJL005W	CYR1	6081	0	0.745		0.05	inviable	Adenylate cyclase; required for cAMP production and cAMP-dependent protein kinase signaling; the cAMP pathway controls a variety of cellular processes, including metabolism, cell cycle, stress response, stationary phase, and sporulation	.
	1-to-1	Anc_1.403	CAGL0H03817g		1485	0	0	0.795		YCL017C	NFS1	1494	0	0.945		-0.15	inviable	Cysteine desulfurase; involved in iron-sulfur cluster (Fe/S) biogenesis and in thio-modification of mitochondrial and cytoplasmic tRNAs; essential protein located predominantly in mitochondria	.
	1-to-1	Anc_3.239	CAGL0D04394g		240	0	0	0.79		YDR016C	DAD1	285	0	0.79		0	inviable	Essential subunit of the Dam1 complex (aka DASH complex); complex couples kinetochores to the force produced by MT depolymerization thereby aiding in chromosome segregation; is transferred to the kinetochore prior to mitosis	.
	1-to-1	Anc_8.728	CAGL0F03751g		1626	0	0	0.785		YMR213W	CEF1	1773	0	0.71		0.075	inviable	Essential splicing factor; associated with Prp19p and the spliceosome, contains an N-terminal c-Myb DNA binding motif necessary for cell viability but not for Prp19p association, evolutionarily conserved and homologous to S. pombe Cdc5p	.
	1-to-1	Anc_3.289	CAGL0E04180g		729	0	0	0.785		YBR070C	ALG14	714	0	0.82		-0.035	inviable	Component of UDP-GlcNAc transferase; required for the second step of dolichyl-linked oligosaccharide synthesis; anchors the catalytic subunit Alg13p to the ER membrane; similar to bacterial and human glycosyltransferases	.
	1-to-1	Anc_7.050	CAGL0M12144g		2916	0	0	0.78		YAL035W	FUN12	3009	0	0.86		-0.08	inviable	Translation initiation factor eIF5B; GTPase that promotes Met-tRNAiMet binding to ribosomes and ribosomal subunit joining; promotes GTP-dependent maturation of 18S rRNA by Nob1p; protein abundance increases in response to DNA replication stress; homolog of bacterial IF2	.
	1-to-1	Anc_5.238	CAGL0J01023g		780	0	0	0.78		YJL035C	TAD2	753	0	0.88		-0.1	inviable	Subunit of tRNA-specific adenosine-34 deaminase; forms a heterodimer with Tad3p that converts adenosine to inosine at the wobble position of several tRNAs	.
	1-to-1	Anc_2.146	CAGL0L04114g		1743	0	0	0.775		YNL124W	NAF1	1479	0	0.645		0.13	inviable	RNA-binding protein required for the assembly of box H/ACA snoRNPs; thus required for pre-rRNA processing; forms a complex with Shq1p and interacts with H/ACA snoRNP components Nhp2p and Cbf5p; similar to Gar1p	.
	1-to-1	Anc_6.266	CAGL0L00517g		3024	0.0330688	0	0.775		YMR185W	RTP1	2946	0	0.88		-0.105	inviable	Protein required for the nuclear import and biogenesis of RNA pol II; conflicting evidence on whether null mutant is viable with elongated buds, or inviable; interacts with Rpb2, Rpb3, Nup116p, Nup100p and components of the R2TP complex (Rvb1p, Rvb2p, Pih1p); similar to human TMCO7 gene	.
	1-to-1	Anc_8.708	CAGL0K08910g		1311	1.56369	0	0.77		YOR259C	RPT4	1314	0	0.825		-0.055	inviable	ATPase of the 19S regulatory particle of the 26S proteasome; one of six ATPases of the regulatory particle; involved in degradation of ubiquitinated substrates; contributes preferentially to ERAD; required for spindle pole body duplication; mainly nuclear localization	.
	1-to-1	Anc_8.637	CAGL0L02673g		2565	0	0	0.765		YOR217W	RFC1	2586	0	0.655		0.11	inviable	Subunit of heteropentameric Replication factor C (RF-C); RF-C is a DNA binding protein and ATPase that acts as a clamp loader of the proliferating cell nuclear antigen (PCNA) processivity factor for DNA polymerases delta and epsilon	.
	1-to-1	Anc_5.472	CAGL0M01606g		1899	4.21274	0	0.765		YDR390C	UBA2	1911	0	0.885		-0.12	inviable	Subunit of heterodimeric nuclear SUMO activating enzyme E1 with Aos1p; activates Smt3p (SUMO) before its conjugation to proteins (sumoylation), which may play a role in protein targeting; essential for viability;	.
	1-to-1	Anc_1.452	CAGL0H06127g		264	0	0	0.765		YEL020W-A	TIM9	264	0	0.921208		-0.156208	inviable	Essential protein of the mitochondrial intermembrane space; forms a complex with Tim10p (TIM10 complex) that delivers hydrophobic proteins to the TIM22 complex for insertion into the inner membrane	.
	1-to-1	Anc_1.328	CAGL0J05016g	TIM54	1359	1.65563	0	0.765		YJL054W	TIM54	1437	0	0.98		-0.215	inviable	Component of the mitochondrial TIM22 complex; involved in insertion of polytopic proteins into the inner membrane	.
	1-to-1	Anc_7.135	CAGL0J02090g		420	0	0	0.76		YIL004C	BET1	560	0	0.935		-0.175	inviable	Type II membrane protein required for vesicular transport; required for vesicular transport between the endoplasmic reticulum and Golgi complex; v-SNARE with similarity to synaptobrevins	.
	1-to-1	Anc_8.617	CAGL0L02871g		2139	0	0	0.76		YOR206W	NOC2	2133	0	0.995		-0.235	inviable	Protein that forms a nucleolar complex with Mak21p; binds to 90S and 66S pre-ribosomes, as well as a nuclear complex with Noc3p that binds to 66S pre-ribosomes; both complexes mediate intranuclear transport of ribosomal precursors	.
	1-to-1	Anc_2.645	CAGL0F06693g		282	0	0	0.755		YHR005C-A	TIM10	282	0	0.77		-0.015	inviable	Essential protein of the mitochondrial intermembrane space; forms a complex with Tim9p (TIM10 complex) that delivers hydrophobic proteins to the TIM22 complex for insertion into the inner membrane	.
	1-to-1	Anc_8.689	CAGL0K09108g		1977	5.5134	0	0.755		YOR249C	APC5	2058	0	0.97		-0.215	inviable	Subunit of the Anaphase-Promoting Complex/Cyclosome (APC/C); APC/C is a ubiquitin-protein ligase required for degradation of anaphase inhibitors, including mitotic cyclins, during the metaphase/anaphase transition; component of the platform domain of the APC/C, based on structural analysis; relative distribution to nuclear foci decreases upon DNA replication stress	.
	1-to-1	Anc_5.221	CAGL0D05874g		1830	0	0	0.75		YJR002W	MPP10	1782	0	0.645		0.105	inviable	Component of the SSU processome and 90S preribosome; required for pre-18S rRNA processing, interacts with and controls the stability of Imp3p and Imp4p, essential for viability; similar to human Mpp10p	.
	1-to-1	Anc_2.577	CAGL0L02497g	FBA1	1086	0.0460405	0	0.75		YKL060C	FBA1	1080	0	0.94		-0.19	inviable	Fructose 1,6-bisphosphate aldolase; required for glycolysis and gluconeogenesis; catalyzes conversion of fructose 1,6 bisphosphate to glyceraldehyde-3-P and dihydroxyacetone-P; locates to mitochondrial outer surface upon oxidative stress	.
	1-to-1	Anc_6.140	CAGL0F07271g		2202	1.99818	0	0.745		YGL113W	SLD3	2007	0	0.74		0.005	inviable	Protein involved in the initiation of DNA replication; required for proper assembly of replication proteins at the origins of replication; interacts with Cdc45p; localizes to nuclear foci that become diffuse upon DNA replication stress	.
	1-to-1	Anc_8.826	CAGL0J06578g		795	0.125786	0	0.735		YML105C	SEC65	822	0	0.92		-0.185	inviable	Subunit of the signal recognition particle (SRP); involved in protein targeting to the ER; interacts with Srp54p; homolog of mammalian SRP19	.
	1-to-1	Anc_4.058	CAGL0D06270g		597	0	0	0.735		YGL047W	ALG13	609	0	0.975		-0.24	inviable	Catalytic component of UDP-GlcNAc transferase; required for the second step of dolichyl-linked oligosaccharide synthesis; anchored to the ER membrane via interaction with Alg14p; similar to bacterial and human glycosyltransferases; protein abundance increases in response to DNA replication stress	.
	1-to-1	Anc_8.825	CAGL0F03333g		1251	0	0	0.73		YMR270C	RRN9	1098	0	0.905		-0.175	inviable	Protein involved in promoting high level transcription of rDNA; subunit of UAF (upstream activation factor) for RNA polymerase I	.
	1-to-1	Anc_5.138	CAGL0B03993g		1752	0	0	0.73		YJR016C	ILV3	1758	0	0.95		-0.22	inviable	Dihydroxyacid dehydratase; catalyzes third step in the common pathway leading to biosynthesis of branched-chain amino acids	.
	1-to-1	Anc_8.657	CAGL0J03894g		654	7.64526	0	0.73		YOR236W	DFR1	636	0	0.995		-0.265	inviable	Dihydrofolate reductase involved in tetrahydrofolate biosynthesis; required for respiratory metabolism	.
	1-to-1	Anc_8.096	CAGL0L09152g		921	0	0	0.725		YFR004W	RPN11	921	0	0.95		-0.225	inviable	Metalloprotease subunit of 19S regulatory particle; part of 26S proteasome lid; couples the deubiquitination and degradation of proteasome substrates; involved, independent of catalytic activity, in fission of mitochondria and peroxisomes; protein abundance increases in response to DNA replication stress	.
	1-to-1	Anc_5.214	CAGL0D05742g		1455	0	0	0.725		YJL002C	OST1	1431	0	0.97		-0.245	inviable	Alpha subunit of the oligosaccharyltransferase complex of the ER lumen; complex catalyzes asparagine-linked glycosylation of newly synthesized proteins	.
	1-to-1	Anc_6.007	CAGL0B03553g		3066	2.25049	0	0.725		YEL055C	POL5	3069	0	0.99		-0.265	inviable	DNA Polymerase phi; has sequence similarity to the human MybBP1A and weak sequence similarity to B-type DNA polymerases, not required for chromosomal DNA replication; required for the synthesis of rRNA	.
	1-to-1	Anc_2.164	CAGL0L03846g		2735	0	0	0.72		YNL112W	DBP2	2643	0	0.64		0.08	inviable	ATP-dependent RNA helicase of the DEAD-box protein family; has a strong preference for dsRNA; interacts with YRA1; required for the assembly of Yra1p, Nab2p and Mex67p onto mRNA and formation of nuclear mRNP; involved in mRNA decay and rRNA processing; may be involved in suppression of transcription from cryptic initiation sites	.
	1-to-1	Anc_7.039	CAGL0D02288g		2640	0	0	0.72		YOR353C	SOG2	2376	0	0.895		-0.175	inviable	Key component of the RAM signaling network; required for proper cell morphogenesis and cell separation after mitosis	.
	1-to-1	Anc_8.087	CAGL0L08976g		1854	0	0	0.72		YFL002C	SPB4	1821	0	0.895		-0.175	inviable	Putative ATP-dependent RNA helicase; nucleolar protein required for synthesis of 60S ribosomal subunits at a late step in the pathway; sediments with 66S pre-ribosomes in sucrose gradients	.
	1-to-1	Anc_6.141	CAGL0F07249g		1611	54.0968	45.3135	0.72		YGL112C	TAF6	1551	0	0.975036		-0.255036	inviable	Subunit (60 kDa) of TFIID and SAGA complexes; involved in transcription initiation of RNA polymerase II and in chromatin modification, similar to histone H4; relocalizes to the cytosol in response to hypoxia	.
	1-to-1	Anc_8.368	CAGL0E00847g		5466	2.5247	0	0.715		YDR170C	SEC7	6030	0	0.875		-0.16	inviable	Guanine nucleotide exchange factor (GEF) for ADP ribosylation factors; involved in proliferation of the Golgi, intra-Golgi transport and ER-to-Golgi transport; found in the cytoplasm and on Golgi-associated coated vesicles	.
	1-to-1	Anc_8.459	CAGL0K11022g		756	0	0	0.715		YDR236C	FMN1	657	0	0.88		-0.165	inviable	Riboflavin kinase, produces riboflavin monophosphate (FMN); FMN is a necessary cofactor for many enzymes; predominantly localizes to the microsomal fraction and also found in the mitochondrial inner membrane	.
	1-to-1	Anc_6.373	CAGL0E00451g		6273	0	0	0.715		YCR093W	CDC39	6327	0	0.895		-0.18	inviable	Component of the kinetochore-associated Ndc80 complex; this complex has multiple roles in regulating mRNA levels including regulation of transcription and destabilizing mRNAs by deadenylation; basal transcription factor	.
	1-to-1	Anc_8.214	CAGL0K10032g		1305	0	0	0.715		YDR082W	STN1	1485	0	0.905		-0.19	inviable	Telomere end-binding and capping protein; plays a key role with Pol12p in linking telomerase action with completion of lagging strand synthesis, and in a regulatory step required for telomere capping	.
	1-to-1	Anc_4.165	CAGL0G00924g	GLM5	3591	1.1139	0	0.715		YLR336C	SGD1	2700	0	0.975		-0.26	inviable	Essential nuclear protein; required for biogenesis of the small ribosomal subunit; has a possible role in the osmoregulatory glycerol response; putative homolog of human NOM1 which is implicated in acute myeloid leukemia	.
	1-to-1	Anc_7.181	CAGL0D05302g		708	0	0	0.71		YBR256C	RIB5	717	0	0.845		-0.135	inviable	Riboflavin synthase; catalyzes the last step of the riboflavin biosynthesis pathway	.
	1-to-1	Anc_7.525	CAGL0I06490g		1527	0	0	0.71		YPR169W	JIP5	1479	0	0.885		-0.175	inviable	Protein required for biogenesis of the large ribosomal subunit; required for biogenesis of the large ribosomal subunit; interacts with proteins involved in RNA processing, ribosome biogenesis, ubiquitination and demethylation; similar to WDR55, a human WD repeat protein; essential gene	.
	1-to-1	Anc_3.418	CAGL0G01782g		4080	0.269608	0	0.705		YPR104C	FHL1	2811	0	0.785		-0.08	inviable	Regulator of ribosomal protein (RP) transcription; has forkhead associated domain that binds phosphorylated proteins; recruits coactivator Ifh1p or corepressor Crf1p to RP gene promoters; also has forkhead DNA-binding domain though in vitro DNA binding assays give inconsistent results; computational analyses suggest it binds DNA directly at highly active RP genes and indirectly through Rap1p moti…	.
	1-to-1	Anc_8.472	CAGL0J09548g		4254	0.364363	0	0.705		YPL016W	SWI1	3945	0	0.92		-0.215	inviable	Subunit of the SWI/SNF chromatin remodeling complex; regulates transcription by remodeling chromatin; required for transcription of many genes, including ADH1, ADH2, GAL1, HO, INO1 and SUC2; can form the prion [SWI+]; human homolog ARID1A is a candidate tumor suppressor gene in breast cancer	.
	1-to-1	Anc_8.361	CAGL0E00913g		1578	0.2218	0	0.7		YDR168W	CDC37	1521	0	0.935		-0.235	inviable	Essential Hsp90p co-chaperone; necessary for passage through the START phase of the cell cycle; stabilizes protein kinase nascent chains and participates along with Hsp90p in their folding	.
	1-to-1	Anc_6.003	CAGL0A01177g		2553	0	0	0.7		YPL268W	PLC1	2610	0	0.94		-0.24	inviable	Phospholipase C; hydrolyzes phosphatidylinositol 4,5-biphosphate (PIP2) to generate the signaling molecules inositol 1,4,5-triphosphate (IP3) and 1,2-diacylglycerol (DAG); involved in regulating many cellular processes	.
	1-to-1	Anc_3.472	CAGL0L04884g		816	1.10294	0	0.695		YGR120C	COG2	789	0	0.83		-0.135	inviable	Essential component of the conserved oligomeric Golgi complex; a cytosolic tethering complex that functions in protein trafficking to mediate fusion of transport vesicles to Golgi compartments; the components of the Golgi complex are Gog1p through Cog8p	.
	1-to-1	Anc_3.265	CAGL0H10098g		2586	0	0	0.695		YBR055C	PRP6	2700	0	0.875		-0.18	inviable	Splicing factor; component of the U4/U6-U5 snRNP complex	.
	1-to-1	Anc_5.450	CAGL0A03014g		1506	0	0	0.695		YDR376W	ARH1	1482	0	0.88		-0.185	inviable	Oxidoreductase of the mitochondrial inner membrane; involved in cytoplasmic and mitochondrial iron homeostasis and required for activity of Fe-S cluster-containing enzymes; one of the few mitochondrial proteins essential for viability	.
	1-to-1	Anc_2.118	CAGL0H09064g	FUR1	651	0	0	0.695		YHR128W	FUR1	651	0	0.95		-0.255	inviable	Uracil phosphoribosyltransferase; synthesizes UMP from uracil; involved in the pyrimidine salvage pathway	.
	1-to-1	Anc_2.004	CAGL0J07590g		1656	0	0	0.69		YNL240C	NAR1	1476	0	0.675		0.015	inviable	Subunit of the cytosolic iron-sulfur (FeS) protein assembly machinery; required for maturation of cytosolic and nuclear FeS proteins and for normal resistance to oxidative stress; homologous to human Narf	.
	1-to-1	Anc_3.083	CAGL0I02948g		945	0	0	0.685		YDR498C	SEC20	1152	0	0.79		-0.105	inviable	Membrane glycoprotein v-SNARE; involved in retrograde transport from the Golgi to the endoplasmic reticulum (ER); required for N- and O-glycosylation in the Golgi but not in the ER; interacts with the Dsl1p complex through Tip20p	.
	1-to-1	Anc_8.192	CAGL0I06721g		273	0	0	0.67		YER146W	LSM5	282	0	0.675		-0.005	inviable	Lsm (Like Sm) protein; part of heteroheptameric complexes (Lsm2p-7p and either Lsm1p or 8p): cytoplasmic Lsm1p complex involved in mRNA decay; nuclear Lsm8p complex part of U6 snRNP and possibly involved in processing tRNA, snoRNA, and rRNA	.
	1-to-1	Anc_3.088	CAGL0I07469g		693	0	0	0.67		YOL102C	TPT1	693	0	0.95		-0.28	inviable	tRNA 2'-phosphotransferase; catalyzes the final step in yeast tRNA splicing: the transfer of the 2'-PO(4) from the splice junction to NAD(+) to form ADP-ribose 1''-2''cyclic phosphate and nicotinamide	.
	1-to-1	Anc_7.192	CAGL0J02376g		1005	0	0	0.67		YIL019W	FAF1	1041	0	0.99		-0.32	inviable	Protein required for pre-rRNA processing; also required for 40S ribosomal subunit assembly	.
	1-to-1	Anc_5.289	CAGL0J00275g		912	0	0	0.665		YDR280W	RRP45	918	0	0.925		-0.26	inviable	Exosome non-catalytic core component; involved in 3'-5' RNA processing and degradation in both the nucleus and the cytoplasm; has similarity to E. coli RNase PH and to human hRrp45p (PM/SCL-75, EXOSC9); protein abundance increases in response to DNA replication stress	.
	1-to-1	Anc_3.113	CAGL0F05203g	RIB7	735	0.612245	0	0.66		YBR153W	RIB7	735	0	0.78		-0.12	inviable	Diaminohydroxyphoshoribosylaminopyrimidine deaminase; catalyzes the second step of the riboflavin biosynthesis pathway	.
	1-to-1	Anc_3.340	CAGL0D01672g		3045	0.394089	0	0.65		YPR055W	SEC8	3198	0	0.895		-0.245	inviable	Essential 121 kDa subunit of the exocyst complex; the exocyst mediates polarized targeting and tethering of post-Golgi secretory vesicles to active sites of exocytosis at the plasma membrane prior to SNARE-mediated fusion; involved in ER and Golgi inheritance in small buds; relocalizes away from bud neck upon DNA replication stress	.
	1-to-1	Anc_5.703	CAGL0H06589g		1752	0.256849	0	0.65		YIL150C	MCM10	1716	0	0.98		-0.33	inviable	Essential chromatin-associated protein; involved in the initiation of DNA replication; required for the association of the MCM2-7 complex with replication origins; required to stabilize the catalytic subunit of DNA polymerase-alpha	.
	1-to-1	Anc_7.515	CAGL0I08349g		2004	0	0	0.645		YPR161C	SGV1	1974	0	0.685		-0.04	inviable	Cyclin (Bur2p)-dependent protein kinase; functions in transcriptional regulation; phosphorylates the carboxy-terminal domain of Rpo21p and the C-terminal repeat domain of Spt5p; regulated by Cak1p; similar to metazoan CDK9 proteins	.
	1-to-1	Anc_6.067	CAGL0L04664g	HEM15	1137	0	0	0.645		YOR176W	HEM15	1182	0	0.705		-0.06	inviable	Ferrochelatase; a mitochondrial inner membrane protein, catalyzes the insertion of ferrous iron into protoporphyrin IX, the eighth and final step in the heme biosynthetic pathway	.
	1-to-1	Anc_8.653	CAGL0J03850g	MGE1	696	5.17241	0	0.64		YOR232W	MGE1	687	0	0.93		-0.29	inviable	Mitochondrial matrix cochaperone; nucleotide release factor for Ssc1p in protein translocation and folding; also acts as cochaperone for Ssq1p in folding of Fe-S cluster proteins; acts as oxidative sensor to regulate mitochondrial Ssc1p; in presence of oxidative stress, dimeric Mge1p becomes a monomer and unable to regulate Ssc1p function; homolog of E. coli GrpE and human Mge1 (GRPEL1), which al…	.
	1-to-1	Anc_8.076	CAGL0L08800g		555	0	0	0.64		YPL010W	RET3	570	0	0.95		-0.31	inviable	Zeta subunit of the coatomer complex (COPI); COPI coats Golgi-derived transport vesicles; involved in retrograde transport between Golgi and ER	.
	1-to-1	Anc_2.282	CAGL0G01584g		1749	0	0	0.64		YNL039W	BDP1	1785	0	0.99		-0.35	inviable	Essential subunit of RNA polymerase III transcription factor (TFIIIB); TFIIIB is involved in transcription of genes encoding tRNAs, 5S rRNA, U6 snRNA, and other small RNAs	.
	1-to-1	Anc_3.282	CAGL0K12100g		984	0	0	0.635		YDR044W	HEM13	987	0	0.915		-0.28	inviable	Coproporphyrinogen III oxidase; an oxygen requiring enzyme that catalyzes the sixth step in the heme biosynthetic pathway; transcription is repressed by oxygen and heme (via Rox1p and Hap1p)	.
	1-to-1	Anc_5.193	CAGL0D05478g		2175	0.045977	0	0.63		YGR186W	TFG1	2208	0	0.98		-0.35	inviable	TFIIF (Transcription Factor II) largest subunit; involved in both transcription initiation and elongation of RNA polymerase II; homologous to human RAP74	.
	1-to-1	Anc_5.402	CAGL0A01914g		11232	0.636574	0	0.625		YHR099W	TRA1	11235	0	0.635		-0.01	inviable	Subunit of SAGA and NuA4 histone acetyltransferase complexes; interacts with acidic activators (e.g., Gal4p) which leads to transcription activation; similar to human TRRAP, which is a cofactor for c-Myc mediated oncogenic transformation	.
	1-to-1	Anc_3.211	CAGL0M10527g		7494	0	0	0.62		YBL004W	UTP20	7482	0	0.943106		-0.323106	inviable	Component of the small-subunit (SSU) processome; SSU processome is involved in the biogenesis of the 18S rRNA	.
	1-to-1	Anc_3.537	CAGL0C02299g	KRE29	1086	0	0	0.605		YER038C	KRE29	1395	0	0.735		-0.13	inviable	Subunit of the SMC5-SMC6 complex; this complex is involved in removal of X-shaped DNA structures that arise between sister chromatids during DNA replication and repair; heterozygous mutant shows haploinsufficiency in K1 killer toxin resistance	.
	1-to-1	Anc_7.021	CAGL0M12254g		2445	0	0	0.605		YAL047C	SPC72	1869	0	0.94		-0.335	inviable	Component of the cytoplasmic Tub4p (gamma-tubulin) complex; binds spindle pole bodies and links them to microtubules; is regulated by Cdc5 kinase; has roles in astral microtubule formation and stabilization	.
	1-to-1	Anc_4.302	CAGL0D03520g		1215	0.0823045	0	0.6		YKL195W	MIA40	1212	0	0.775		-0.175	inviable	Mitochondrial oxidoreductase; involved in mitochondrial intermembrane space import; component of MIA pathway which mediates import and oxidative folding of substrates including small proteins containing twin cysteine motifs; acts in concert with Erv1p, which oxidizes the cysteine residues of Mia40p to comprise a disulfide relay system that catalyzes import; also mediates folding of Atp23p via a c…	.
	1-to-1	Anc_4.280	CAGL0D00528g		6246	0.0960615	0	0.595		YKL182W	FAS1	6156	0	0.67		-0.075	inviable	Beta subunit of fatty acid synthetase; complex catalyzes the synthesis of long-chain saturated fatty acids; contains acetyltransacylase, dehydratase, enoyl reductase, malonyl transacylase, and palmitoyl transacylase activities	.
	1-to-1	Anc_5.613	CAGL0M08888g		528	0	0	0.59		YDR478W	SNM1	597	0	0.89		-0.3	inviable	Ribonuclease MRP complex subunit; ribonuclease (RNase) MRP cleaves pre-rRNA and has a role in cell cycle-regulated degradation of daughter cell-specific mRNAs; binds to the NME1 RNA subunit of RNase MRP	.
	1-to-1	Anc_5.215	CAGL0D05764g		2622	0.991609	0	0.59		YLL003W	SFI1	2841	0	0.93		-0.34	inviable	Centrin (Cdc31p)-binding protein required for SPB duplication; localizes to the half-bridge of the spindle pole body (SPB); required for progression through G(2)-M transition; has similarity to Xenopus laevis XCAP-C	.
	1-to-1	Anc_3.321	CAGL0F04301g		4452	0	0	0.59		YBL034C	STU1	4542	0	0.94		-0.35	inviable	Component of the mitotic spindle; binds to interpolar microtubules via its association with beta-tubulin (Tub2p); required for interpolar microtubules to provide an outward force on the spindle poles	.
	1-to-1	Anc_6.381	CAGL0C03355g		930	1.55914	0	0.585		YNR054C	ESF2	951	0	0.825		-0.24	inviable	Essential nucleolar protein involved in pre-18S rRNA processing; binds to RNA and stimulates ATPase activity of Dbp8; involved in assembly of the small subunit (SSU) processome	.
	1-to-1	Anc_1.229	CAGL0L05566g		1125	0	0	0.58		YJL125C	GCD14	1152	0	0.81		-0.23	inviable	Subunit of tRNA (1-methyladenosine) methyltransferase; required, along with Gcd10p, for the modification of the adenine at position 58 in tRNAs, especially tRNAi-Met; first identified as a negative regulator of GCN4 expression	.
	1-to-1	Anc_5.123	CAGL0M07898g		2478	1.49314	0	0.575		YLR045C	STU2	2667	0	0.875		-0.3	inviable	Microtubule-associated protein (MAP) of the XMAP215/Dis1 family; regulates microtubule dynamics during spindle orientation and metaphase chromosome alignment; interacts with spindle pole body component Spc72p	.
	1-to-1	Anc_3.191	CAGL0H09878g	IPP1	864	0.231481	0	0.57		YBR011C	IPP1	864	0	0.97		-0.4	inviable	Cytoplasmic inorganic pyrophosphatase (PPase); homodimer that catalyzes the rapid exchange of oxygens from Pi with water, highly expressed and essential for viability, active-site residues show identity to those from E. coli PPase	.
	1-to-1	Anc_4.319	CAGL0M00874g		258	0	0	0.565		YLR438C-A	LSM3	270	0	0.665		-0.1	inviable	Lsm (Like Sm) protein; part of heteroheptameric complexes (Lsm2p-7p and either Lsm1p or 8p): cytoplasmic Lsm1p complex involved in mRNA decay; nuclear Lsm8p complex part of U6 snRNP and possibly involved in processing tRNA, snoRNA, and rRNA; protein increases in abundance and relocalizes from nucleus to cytoplasmic foci upon DNA replication stress	.
	1-to-1	Anc_6.015	CAGL0E02673g		792	0	0	0.565		YOR004W	UTP23	765	0	0.805		-0.24	inviable	Component of the small subunit processome; involved in 40S ribosomal subunit biogenesis; interacts with snR30 and is required for dissociation of snR30 from large pre-ribosomal particles; has homology to PINc domain protein Fcf1p, although the PINc domain of Utp23p is not required for function; essential protein	.
	1-to-1	Anc_1.132	CAGL0F02475g		1149	5.57006	0	0.56		YJL203W	PRP21	843	0	0.79		-0.23	inviable	Subunit of the SF3a splicing factor complex; required for spliceosome assembly	.
	1-to-1	Anc_2.646	CAGL0L05302g		1635	1.52905	0	0.555		YKL088W	CAB3	1716	0	0.63		-0.075	inviable	Subunit of PPCDC and CoA-SPC complexes involved in CoA biosynthesis; subunits of the phosphopantothenoylcysteine decarboxylase (PPCDC) complex are: Cab3p, Sis2p, Vhs3p, while the subunits of the CoA-synthesizing protein complex (CoA-SPC) are: Cab2p, Cab3p, Cab4p, and Cab5p as well as Sis2p and Vhs3p; null mutant lethality is complemented by E. coli coaBC	.
	1-to-1	Anc_3.203	CAGL0C04279g		825	5.09091	0	0.54		YBR002C	RER2	861	0	0.73		-0.19	inviable	Cis-prenyltransferase involved in dolichol synthesis; participates in endoplasmic reticulum (ER) protein sorting	.
	1-to-1	Anc_3.224	CAGL0I04818g		2745	0	0	0.54		YBR038W	CHS2	2892	0	0.88		-0.34	inviable	Chitin synthase II; catalyzes transfer of N-acetylglucosamine (GlcNAc) to chitin upon activation of zymogenic form; required for chitin synthesis in the primary septum during cytokinesis; localization regulated by Cdk1p during mitosis; phosphorylation by Dbf2p kinase regulates its dynamics and chitin synthesis during cytokinesis	.
	1-to-1	Anc_8.551	CAGL0M05247g		702	0	0	0.54		YBR193C	MED8	672	0	0.965		-0.425	inviable	Subunit of the RNA polymerase II mediator complex; associates with core polymerase subunits to form the RNA polymerase II holoenzyme; essential for transcriptional regulation	.
	1-to-1	Anc_4.065	CAGL0E03179g		1266	0	0	0.535		YGR156W	PTI1	1278	0	0.705		-0.17	inviable	Essential component of CPF (cleavage and polyadenylation factor); involved in 3' end formation of snoRNA and mRNA; interacts directly with Pta1p; relocalizes to the cytosol in response to hypoxia; similar to mammalian Cleavage-Stimulation Factor CstF-64	.
	1-to-1	Anc_5.657	CAGL0L10230g		1134	0	0	0.535		YOR057W	SGT1	1188	0	0.905		-0.37	inviable	Cochaperone protein; regulates activity of adenylyl cyclase Cyr1p; involved in kinetochore complex assembly; associates with the SCF (Skp1p/Cdc53p/F box protein) ubiquitin ligase complex; acts as a linker between Skp1p and HSP90 complexes; protein abundance increases in response to DNA replication stress	.
	1-to-1	Anc_4.139	CAGL0A00935g		681	0.146843	0	0.5		YLR323C	CWC24	780	0	0.935		-0.435	inviable	General splicing factor; required for stable U2 snRNP binding to primary transcripts; essential for the first step of splicing; component of the pre-catalytic spliceosome complex containing Cef1p; similar to S. pombe Cwf24p	.
	1-to-1	Anc_3.432	CAGL0B04169g		2586	0.232019	0	0.5		YPR112C	MRD1	2664	0	0.955		-0.455	inviable	Essential conserved small ribosomal subunit (40s) synthesis factor; component of the 90S preribosome; required for production of 18S rRNA and small ribosomal subunit; contains five consensus RNA-binding domains and binds to the pre-rRNA at two sites within the 18S region	.
	1-to-1	Anc_5.514	CAGL0F02849g		747	0	0	0.49		YDR412W	RRP17	708	0	0.795		-0.305	inviable	Component of the pre-60S pre-ribosomal particle; required for cell viability under standard (aerobic) conditions but not under anaerobic conditions; exonuclease required for 5&#8242; end processing of pre-60S ribosomal RNA	.
	1-to-1	Anc_7.179	CAGL0L09625g		843	0	0	0.455		YIR011C	STS1	960	0	0.86		-0.405	inviable	Protein required for localizing proteasomes to the nucleus; interacts with the karyopherin Srp1p; involved in ubiquitin-mediated protein degradation	.
	1-to-1	Anc_3.309	CAGL0M11154g		2973	1.0259	0	0.45		YDR060W	MAK21	3078	0	0.945		-0.495	inviable	Constituent of 66S pre-ribosomal particles; required for large (60S) ribosomal subunit biogenesis; involved in nuclear export of pre-ribosomes; required for maintenance of dsRNA virus; homolog of human CAATT-binding protein	.
	1-to-1	Anc_3.422	CAGL0G01694g		630	0	0	0.445		YPR107C	YTH1	627	0	0.89		-0.445	inviable	Essential RNA-binding component of cleavage and polyadenylation factor; contains five zinc fingers; required for pre-mRNA 3'-end processing and polyadenylation; relocalizes to the cytosol in response to hypoxia	.
	1-to-1	Anc_4.077	CAGL0E03069g		2538	0.0985028	0	0.44		YGR145W	ENP2	2124	0	0.745		-0.305	inviable	Essential nucleolar protein; required for biogenesis of the small ribosomal subunit; contains WD repeats, interacts with Mpp10p and Bfr2p, and has homology to Spb1p	.
	1-to-1	Anc_8.712	CAGL0C02805g		1044	0	0	0.425		YOR262W	GPN2	1044	0	0.965		-0.54	inviable	Putative GTPase with a role in biogenesis of RNA pol II and polIII; may be involved in assembly of RNA polymerases II and III and in their transport into the nucleus; contains a Gly-Pro-Asn motif in the G domain; similar to Npa3p and Gpn3p; highly conserved across species and homologous to human gene GPN2/ATPBD1B; required for establishment of sister chromatid cohesion	.
	1-to-1	Anc_6.215	CAGL0H03553g		1488	1.27688	0	0.405		YPL204W	HRR25	1485	0	0.56		-0.155	inviable	Protein kinase; involved in regulating diverse events including vesicular trafficking, DNA repair, and chromosome segregation; binds the CTD of RNA pol II; phosphorylates the COPII coat; interacts with Sit4p phosphatase; homolog of mammalian casein kinase 1delta (CK1delta)	.
	1-to-1	Anc_5.656	CAGL0G01991g		1470	6.93878	0	0.39		YOR056C	NOB1	1380	0	0.895		-0.505	inviable	Protein involved in proteasomal and 40S ribosomal subunit biogenesis; required for cleavage of the 20S pre-rRNA to generate the mature 18S rRNA; cleavage is activated by Fun12p, a GTPase and translation initiation factor; relocalizes from nucleus to nucleolus upon DNA replication stress	.
	1-to-1	Anc_3.294	CAGL0H08371g		1083	0	0	0.385		YDR047W	HEM12	1089	0	0.655		-0.27	inviable	Uroporphyrinogen decarboxylase; catalyzes the fifth step in the heme biosynthetic pathway; localizes to both the cytoplasm and nucleus; a hem12 mutant has phenotypes similar to patients with porphyria cutanea tarda	.
	1-to-1	Anc_3.020	CAGL0E01463g	CDC33	630	0	0	0.37		YOL139C	CDC33	642	0	0.95		-0.58	inviable	mRNA cap binding protein and translation initiation factor eIF4E; the eIF4E-cap complex is responsible for mediating cap-dependent mRNA translation via interactions with translation initiation factor eIF4G (Tif4631p or Tif4632p); protein abundance increases in response to DNA replication stress; mutants are defective for adhesion and pseudohyphal growth	.
	1-to-1	Anc_3.395	CAGL0K07986g		1599	0	0	0.36		YPR088C	SRP54	1626	0	0.68		-0.32	inviable	Signal recognition particle (SRP) subunit (homolog of mammalian SRP54); contains the signal sequence-binding activity of SRP, interacts with the SRP RNA, and mediates binding of SRP to signal receptor; contains GTPase domain	.
	1-to-1	Anc_2.121	CAGL0J05720g		414	1.08696	0	0.36		YNL149C	PGA2	390	0	0.74		-0.38	inviable	Essential protein required for maturation of Gas1p and Pho8p; involved in protein trafficking; GFP-fusion protein localizes to the ER and YFP-fusion protein to the nuclear envelope-ER network; null mutants have a cell separation defect	.
	1-to-1	Anc_6.142	CAGL0K07111g		282	0	0	0.355		YBR233W-A	DAD3	285	0	0.805		-0.45	inviable	Essential subunit of the Dam1 complex (aka DASH complex); complex couples kinetochores to the force produced by MT depolymerization thereby aiding in chromosome segregation; is transferred to the kinetochore prior to mitosis	.
	1-to-1	Anc_8.138	CAGL0K02211g		1056	0	0	0.345		YER127W	LCP5	1074	0	0.975		-0.63	inviable	Essential protein involved in maturation of 18S rRNA; depletion leads to inhibited pre-rRNA processing and reduced polysome levels; localizes primarily to the nucleolus	.
	1-to-1	Anc_3.334	CAGL0H08525g		306	6.37255	0	0.315		YBR091C	TIM12	330	0	1		-0.685	inviable	Essential protein of the inner mitochondrial membrane; peripherally localized; component of the TIM22 complex, which is a twin-pore translocase that mediates insertion of numerous multispanning inner membrane proteins	.
	1-to-1	Anc_6.269	CAGL0H00891g		4428	0.293586	0	0.305		YPL242C	IQG1	4488	0	0.885		-0.58	inviable	Essential protein required for determination of budding pattern; promotes localization of axial markers Bud4p and Cdc12p and functionally interacts with Sec3p, localizes to the contractile ring during anaphase, member of the IQGAP family; relocalizes from bud neck to cytoplasm upon DNA replication stress	.
	1-to-1	Anc_3.545	CAGL0C02189g	SAH1	1350	1	0	0.295		YER043C	SAH1	1350	0	0.935		-0.64	inviable	S-adenosyl-L-homocysteine hydrolase; catabolizes S-adenosyl-L-homocysteine which is formed after donation of the activated methyl group of S-adenosyl-L-methionine (AdoMet) to an acceptor; regulates cellular lipid homoeostasis by regulating phosphatidylcholine(PC)synthesis and triacylglycerol (TG) levels	.
	1-to-1	Anc_6.213	CAGL0H03531g	MNP1	531	0	0	0.28		YGL068W	MNP1	585	0	0.715		-0.435	inviable	Protein associated with the mitochondrial nucleoid; putative mitochondrial ribosomal protein with similarity to E. coli L7/L12 ribosomal protein; required for normal respiratory growth	.
	1-to-1	Anc_5.234	CAGL0J00968g		375	0	0	0.235		YLR010C	TEN1	483	0	0.855		-0.62	inviable	Protein that regulates telomeric length; protects telomeric ends in a complex with Cdc13p and Stn1p	.
	1-to-1	Anc_4.238	CAGL0D00924g		5943	0.201918	0	0.21		YDL058W	USO1	5373	0	0.67		-0.46	inviable	Essential protein involved in vesicle-mediated ER to Golgi transport; binds membranes and functions during vesicle docking to the Golgi; required for assembly of the ER-to-Golgi SNARE complex	.
	1-to-1	Anc_6.209	CAGL0H03443g		2121	0.660066	0	0.18		YGL073W	HSF1	2502	0	0.775		-0.595	inviable	Trimeric heat shock transcription factor; activates multiple genes in response to highly diverse stresses, including hyperthermia; recognizes variable heat shock elements (HSEs) consisting of inverted NGAAN repeats; monitors translational status of cell at the ribosome through an RQC (Ribosomal Quality Control)-mediated translation-stress signal; involved in diauxic shift; posttranslationally reg…	.
	1-to-1	Anc_6.370	CAGL0C03531g		405	0	0	0.16		YNR046W	TRM112	408	0	0.74		-0.58	inviable	Protein involved in methylation of tRNA, rRNA, and translation factors; also involved in ribosome biogenesis; subunit of tRNA methyltransferase (MTase) complexes in combination with Trm9p and Trm11p; interacts with and stabilizes 18S rRNA methyltransferase Bud23p; subunit of complex with Mtq2p that methylates Sup45p (eRF1) in the ternary complex eRF1-eRF3-GTP; relative distribution to the nucleus…	.
	1-to-1	Anc_5.135	CAGL0B04037g		522	2.68199	0	0.14		YJR017C	ESS1	513	0	0.515		-0.375	inviable	Peptidylprolyl-cis/trans-isomerase (PPIase); specific for phosphorylated serine and threonine residues N-terminal to proline; regulates phosphorylation of the RNAP II large subunit (Rpo21p) C-terminal domain (CTD); associates with phospho-Ser5 form of RNAP II in vivo; regulates phosphorylation of Ser7 within CTD; present along entire coding length of genes; represses initiation of CUTs; required …	.
	1-to-1	Anc_3.213	CAGL0C04455g	ATP16	465	0	0	0.14		YDL004W	ATP16	483	0	0.7		-0.56	inviable	Delta subunit of the central stalk of mitochondrial F1F0 ATP synthase; F1F0 ATP synthase is a large, evolutionarily conserved enzyme complex required for ATP synthesis; F1 translationally regulates ATP6 and ATP8 expression to achieve a balanced output of ATP synthase genes encoded in nucleus and mitochondria; phosphorylated	.
	1-to-1	Anc_8.734	CAGL0L11000g		837	0	0	0.125		YOR278W	HEM4	828	0	0.695		-0.57	inviable	Uroporphyrinogen III synthase; catalyzes the conversion of hydroxymethylbilane to uroporphyrinogen III, the fourth step in heme biosynthesis; deficiency in the human homolog can result in the disease congenital erythropoietic porphyria	.
	1-to-1	Anc_5.593	CAGL0K06501g		678	0	0	0.105		YDR468C	TLG1	675	0	0.845		-0.74	inviable	Essential t-SNARE that mediates fusion of vesicles with the late Golgi; forms a complex with Tlg2p and Vti1p; mediates fusion of endosome-derived vesicles with the late Golgi; binds the docking complex VFT (Vps fifty-three) through interaction with Vps51p	.
	1-to-1	Anc_4.167	CAGL0G00946g		597	0.167504	0	0.075		YGR029W	ERV1	653	0	0.955		-0.88	inviable	Flavin-linked sulfhydryl oxidase of the mitochondrial IMS; N-terminus is an intrinsically disordered domain that in the cytosol helps target Erv1p to mitochondria, and in the intermembrane space oxidizes Mia40p as part of a disulfide relay system that promotes intermembrane space retention of imported proteins; ortholog of human hepatopoietin (ALR)	.
	1-to-1	Anc_7.399	CAGL0G03333g		561	0	0	0.05		YER104W	RTT105	627	0	0.845		-0.795	inviable	Protein with a role in regulation of Ty1 transposition	.
	1-to-1	Anc_5.267	CAGL0J00693g		5655	0.0530504	0	0.045		YHR023W	MYO1	5787	0	0.6		-0.555	inviable	Type II myosin heavy chain; required for wild-type cytokinesis and cell separation; localizes to the actomyosin ring; binds to myosin light chains Mlc1p and Mlc2p through its IQ1 and IQ2 motifs respectively	.
	1-to-1	Anc_5.404	CAGL0L11528g	BIG1	960	0.104167	0	0.045		YHR101C	BIG1	1095	0	0.76		-0.715	inviable	Integral membrane protein of the endoplasmic reticulum; required for normal content of cell wall beta-1,6-glucan	.
	1-to-1	Anc_2.317	CAGL0E05038g		4455	1.8743	0	0.025		YGL150C	INO80	4470	0	0.91		-0.885	inviable	ATPase and nucleosome spacing factor; subunit of complex containing actin and actin-related proteins that has chromatin remodeling activity and 3' to 5' DNA helicase activity in vitro; has a role in modulating stress gene transcription	.
	1-to-1	Anc_8.630	CAGL0M02761g	TBF1	1578	0	0	0.02		YPL128C	TBF1	1689	0	0.98		-0.96	inviable	Telobox-containing general regulatory factor; binds TTAGGG repeats within subtelomeric anti-silencing regions (STARs), blocking silent chromatin propagation; binds majority of snoRNA gene promoters, required for full snoRNA expression; caps DSB flanked by long T2AG3 repeats and blocks checkpoint activation	.
	1-to-1	Anc_4.212	CAGL0K04565g		1863	1.23457	0	0.01		YGR065C	VHT1	1782	0	0.91		-0.9	inviable	High-affinity plasma membrane H+-biotin (vitamin H) symporter; mutation results in fatty acid auxotrophy; 12 transmembrane domain containing major facilitator subfamily member; mRNA levels negatively regulated by iron deprivation and biotin	confirmed
	1-to-1	Anc_2.077	CAGL0G05786g		636	0	0	0.06		YDL212W	SHR3	633	0	0.815		-0.755	inviable	Endoplasmic reticulum packaging chaperone; required for incorporation of amino acid permeases into COPII coated vesicles for transport to the cell surface	.
	1-to-1	Anc_5.158	CAGL0B03773g		1818	0	0	0		YGR191W	HIP1	1812	0	0.943106		-0.943106	inviable	High-affinity histidine permease; also involved in the transport of manganese ions	.
	1-to-1	Anc_3.343	CAGL0K12166g		2295	1.1329	0	0.185		YBR102C	EXO84	2262	0	0.91		-0.725	inviable	Exocyst subunit with dual roles in exocytosis and spliceosome assembly; subunit of the the exocyst complex which mediates polarized targeting and tethering of post-Golgi secretory vesicles to active sites of exocytosis at the plasma membrane (PM) prior to SNARE-mediated fusion; required for exocyst assembly and targeting the complex to specific sites on the bud tip PM; associates the U1 snRNP; ro…	.
	1-to-1	Anc_5.165	CAGL0G06864g		1980	0.530303	0	0.035		YJL019W	MPS3	2049	0	0.72		-0.685	inviable	Nuclear envelope protein; required for SPB insertion, initiation of SPB duplication and nuclear fusion; interacts with Mps2p to tether half-bridge to core SPB; N-terminal acetylation of Mps3p by Eco1p regulates its role in nuclear organization; localizes to the SPB half bridge and at telomeres during meiosis; required with Ndj1p and Csm4p for meiotic bouquet formation and telomere-led rapid proph…	.
	1-to-1	Anc_5.345	CAGL0H07205g		1110	0	0	0.48		YHR069C	RRP4	1080	0	0.935		-0.455	inviable	Exosome non-catalytic core component; involved in 3'-5' RNA processing and degradation in both the nucleus and the cytoplasm; predicted to contain RNA binding domains; has similarity to human hRrp4p (EXOSC2)	.
	1-to-1	Anc_5.147	CAGL0B03905g		1296	0	0	0.38		YJR013W	GPI14	1212	0	0.785		-0.405	inviable	Glycosylphosphatidylinositol-alpha 1,4 mannosyltransferase I; involved in GPI anchor biosynthesis, requires Pbn1p for function; homolog of mammalian PIG-M	.
	1-to-1	Anc_5.320	CAGL0H01485g		654	6.42202	0	0.375		YDR302W	GPI11	660	0	0.91		-0.535	inviable	ER membrane protein involved in a late step of GPI anchor assembly; involved in the addition of phosphoethanolamine to the multiply mannosylated glycosylphosphatidylinositol (GPI) intermediate; human PIG-Fp is a functional homolog	.
	1-to-1	Anc_2.281	CAGL0G01562g		726	0.757576	0	0.35		YNL038W	GPI15	764	0	0.86		-0.51	inviable	Protein involved in the synthesis of GlcNAc-PI; GlcNAc-PI is the first intermediate in the synthesis of glycosylphosphatidylinositol (GPI) anchors; homologous to the human PIG-H protein; GlcNAc-PI stands for N-acetylglucosaminyl phosphatidylinositol	.
	1-to-1	Anc_7.347	CAGL0I03388g		576	0.694444	0	0.45		YDL165W	CDC36	576	0	0.85		-0.4	inviable	Component of the kinetochore-associated Ndc80 complex; this complex has multiple roles in regulating mRNA levels including regulation of transcription and destabilizing mRNAs through deadenylation; basal transcription factor	.
	1-to-1	Anc_7.174	CAGL0D05368g		342	0	0	0.435		YBR253W	SRB6	366	0	0.943106		-0.508106	inviable	Subunit of the RNA polymerase II mediator complex; associates with core polymerase subunits to form the RNA polymerase II holoenzyme; essential for transcriptional regulation	.
	1-to-1	Anc_2.436	CAGL0K03531g		378	0	0	0.3		YMR112C	MED11	396	0	0.805		-0.505	inviable	Subunit of the RNA polymerase II mediator complex; associates with core polymerase subunits to form the RNA polymerase II holoenzyme; essential protein	.
	1-to-1	Anc_7.503	CAGL0I08261g		2031	0.0492368	0	0.265		YER022W	SRB4	2064	0	0.99		-0.725	inviable	Subunit of the RNA polymerase II mediator complex; associates with core polymerase subunits to form the RNA polymerase II holoenzyme; essential for transcriptional regulation; homozygosity of the human MED17 L371P mutation is associated with infantile cerebral and cerebellar atrophy with poor myelination	.
	1-to-1	Anc_6.065	CAGL0L04620g		795	0	0	0.235		YOR174W	MED4	855	0	0.71		-0.475	inviable	Subunit of the RNA polymerase II mediator complex; associates with core polymerase subunits to form the RNA polymerase II holoenzyme; essential for transcriptional regulation	.
	1-to-1	Anc_5.324	CAGL0D03828g		909	0	0	0.065		YHR058C	MED6	888	0	0.525		-0.46	inviable	Subunit of the RNA polymerase II mediator complex; associates with core polymerase subunits to form the RNA polymerase II holoenzyme; essential for transcriptional regulation; protein abundance increases in response to DNA replication stress	.
	1-to-1	Anc_7.118	CAGL0K08712g		387	1.03359	0	0.35		YIR015W	RPR2	435	0	0.915		-0.565	inviable	Subunit of nuclear RNase P; nuclear RNase P cleaves tRNA precursors to generate mature 5' ends and facilitates turnover of nuclear RNAs; not shared between RNase MRP and RNase P, in contrast to all other RNase P protein subunits; protein abundance increases in response to DNA replication stress	.
	1-to-1	Anc_8.164	CAGL0J04334g		378	0	0	0.06		YBL018C	POP8	477	0	0.775		-0.715	inviable	Subunit of both RNase MRP and nuclear RNase P; RNase MRP cleaves pre-rRNA, while nuclear RNase P cleaves tRNA precursors to generate mature 5' ends and facilitates turnover of nuclear RNAs; relocalizes to the cytosol in response to hypoxia	.
	1-to-1	Anc_3.028	CAGL0E01567g	RBX1	309	0	0	0.27		YOL133W	HRT1	366	0	0.906244		-0.636244	inviable	RING-H2 domain core subunit of multiple ubiquitin ligase complexes; subunit of Skp1-Cullin-F-box (SCF) that tethers the Cdc34p (E2) and Cdc53p (cullin) SCF subunits, and is required for degradation of Gic2p, Far1p, Sic1p and Cln2p; subunit of the Rtt101p-Mms1p-Mms22p ubiquitin ligase that stabilizes replication forks after DNA lesions; subunit of the Cul3p-Elc1p-Ela1p ubiquitin ligase involved in…	.
	1-to-1	Anc_8.067	CAGL0L02629g		2388	0	0	0.155		YFL009W	CDC4	2340	8.88889	0.955		-0.8	inviable	F-box protein required for both the G1/S and G2/M phase transitions; modular substrate specificity factor which associates with core SCF (Cdc53p, Skp1p and Hrt1p/Rbx1p) to form the SCFCdc4 complex; SCFCdc4 acts as a ubiquitin-protein ligase directing ubiquitination of cyclin-dependent kinase (CDK) phosphorylated substrates, such as: Sic1p, Far1p, Cdc6p, Clb6p, and Cln3p	.
	1-to-1	Anc_8.219	CAGL0I08635g		420	0	0	0.435		YER159C	BUR6	429	0	0.865		-0.43	inviable	Subunit of a heterodimeric NC2 transcription regulator complex; complex binds to TBP and can repress transcription by preventing preinitiation complex assembly or stimulate activated transcription; homologous to human NC2alpha; complex also includes Ncb2p	.
	1-to-1	Anc_8.754	CAGL0M11264g		1650	0.454545	0	0.375		YMR227C	TAF7	1773	0	0.86		-0.485	inviable	TFIID subunit (67 kDa); involved in RNA polymerase II transcription initiation	.
	1-to-1	Anc_8.838	CAGL0B02299g		1932	0	0	0.275		YML114C	TAF8	1533	0	0.755		-0.48	inviable	TFIID subunit (65 kDa); involved in RNA polymerase II transcription initiation	.
	1-to-1	Anc_5.479	CAGL0I07117g		945	0	0	0.255		YOR143C	THI80	960	0	0.94		-0.685	inviable	Thiamine pyrophosphokinase; phosphorylates thiamine to produce the coenzyme thiamine pyrophosphate (thiamine diphosphate)	.
	1-to-1	Anc_8.213	CAGL0K10054g		2385	0.0209644	0	0.055		YDR081C	PDC2	2778	0	0.65		-0.595	inviable	Transcription factor for thiamine-regulated genes; required for expression of the two isoforms of pyruvate decarboxylase (PDC1 and PDC5) along with thiamine biosynthetic genes; binds a DNA sequence in the PDC5 promoter; mutant fails to grow on 2% glucose and thus is scored as inviable under standard conditions	.
	1-to-1	Anc_2.471	CAGL0J01309g		1329	0	0	0.03		YMR091C	NPL6	1308	0	0.54		-0.51	inviable	Component of the RSC chromatin remodeling complex; interacts with Rsc3p, Rsc30p, Ldb7p, and Htl1p to form a module important for a broad range of RSC functions; involved in nuclear protein import and maintenance of proper telomere length	.
	1-to-1	Anc_2.518	CAGL0L02189g		1671	0	0	0.02		YKR008W	RSC4	1878	0	0.943106		-0.923106	inviable	Component of the RSC chromatin remodeling complex; found in close proximity to nucleosomal DNA; displaced from the surface of nucleosomal DNA after chromatin remodeling; acetylated (K25) by Gcn5p, altering replication stress tolerance; contains tandem bromodomains that recognize histone H3 acetylated on K14 (H3K14ac) by Gcn5p	.
	1-to-1	Anc_8.072	CAGL0L08646g		1767	0	0	0.42		YPL020C	ULP1	1866	0	0.855		-0.435	inviable	Protease that specifically cleaves Smt3p protein conjugates; required for cell cycle progression; associates with nucleoporins and may interact with septin rings during telophase; sequestered to the nucleolus under stress conditions	.
	1-to-1	Anc_7.197	CAGL0J02464g		2751	0.145402	0	0.025		YIL031W	ULP2	3105	0	0.8		-0.775	inviable	Peptidase that deconjugates Smt3/SUMO-1 peptides from proteins; plays a role in chromosome cohesion at centromeric regions and recovery from checkpoint arrest induced by DNA damage or DNA replication defects; potential Cdc28p substrate	.
	1-to-1	Anc_1.051	CAGL0K05731g		327	0	0	0.32		YDR510W	SMT3	306	0	0.921208		-0.601208	inviable	Ubiquitin-like protein of the SUMO family; conjugated to lysine residues of target proteins; associates with transcriptionally active genes; regulates chromatid cohesion, chromosome segregation, APC-mediated proteolysis, DNA replication and septin ring dynamics; phosphorylated at Ser2	.
	1-to-1	Anc_1.448	CAGL0M03267g		801	0	0	0		YEL019C	MMS21	804	0	0.785		-0.785	inviable	SUMO ligase and component of the SMC5-SMC6 complex; this complex plays a key role in the removal of X-shaped DNA structures that arise between sister chromatids during DNA replication and repair; mutants are sensitive to methyl methanesulfonate and show increased spontaneous mutation and mitotic recombination	.
	1-to-1	Anc_5.231	CAGL0J00913g		1137	8.00352	0	0.3		YLR007W	NSE1	1011	0	0.86		-0.56	inviable	Component of the SMC5-SMC6 complex; this complex plays a key role in the removal of X-shaped DNA structures that arise between sister chromatids during DNA replication and repair	.
	1-to-1	Anc_8.068	CAGL0F02079g		3672	2.77778	0	0.445		YFL008W	SMC1	3678	0	0.594706		-0.149706	inviable	Subunit of the multiprotein cohesin complex; essential protein involved in chromosome segregation and in double-strand DNA break repair; SMC chromosomal ATPase family member, binds DNA with a preference for DNA with secondary structure	.
	1-to-1	Anc_7.136	CAGL0J02112g		858	0	0	0.42		YIL003W	CFD1	882	0	0.8		-0.38	inviable	Highly conserved iron-sulfur cluster binding protein; localized in the cytoplasm; forms a complex with Nbp35p that is involved in iron-sulfur protein assembly in the cytosol	.
	1-to-1	Anc_7.219	CAGL0J02794g		312	11.3782	0	0.355		YER048W-A	ISD11	285	0	0.565		-0.21	inviable	Cysteine desulfurase (Nfs1p) activator; essential for the formation of the persulfide intermediate at the desulfurase active site during pyridoxal phosphate-dependent desulfuration of cysteine; required for mitochondrial iron-sulfur cluster biosynthesis	.
	1-to-1	Anc_2.139	CAGL0L13046g		672	0	0	0.045		YHR122W	CIA2	696	0	0.845		-0.8	inviable	Component of cytosolic iron-sulfur protein assembly (CIA) machinery; acts at a late step of Fe-S cluster assembly; forms the CIA targeting complex with Cia1p and Met18p that directs Fe-S cluster incorporation into a subset of proteins involved in methionine biosynthesis, DNA replication and repair, transcription, and telomere maintenance; ortholog of human FAM96B	.
	1-to-1	Anc_2.309	CAGL0M05643g	YFH1	531	0	0	0.01		YDL120W	YFH1	525	0	0.555		-0.545	inviable	Mitochondrial matrix iron chaperone; oxidizes and stores iron; interacts with Isu1p to promote Fe-S cluster assembly; mutation results in multiple Fe/S-dependent enzyme deficiencies; human frataxin homolog is mutated in Friedrich's ataxia	.
	1-to-1	Anc_4.103	CAGL0A00297g		597	1.75879	0	0		YGL018C	JAC1	555	0	0.79		-0.79	inviable	Specialized J-protein that functions in Fe-S cluster biogenesis; functions with Hsp70 in Fe-S cluster biogenesis in mitochondria; involved in iron metabolism; contains a J domain typical to J-type chaperones; localizes to the mitochondrial matrix	.
	1-to-1	Anc_8.174	CAGL0G05115g		463	0	0	0.4		YBL026W	LSM2	416	0	0.91		-0.51	inviable	Lsm (Like Sm) protein; part of heteroheptameric complexes (Lsm2p-7p and either Lsm1p or 8p): cytoplasmic Lsm1p complex involved in mRNA decay; nuclear Lsm8p complex part of U6 snRNP and possibly involved in processing tRNA, snoRNA, and rRNA; relocalizes from nucleus to cytoplasmic foci upon DNA replication stress	.
	1-to-1	Anc_5.130	CAGL0M07854g		318	0	0	0.075		YJR022W	LSM8	330	0	0.78		-0.705	inviable	Lsm (Like Sm) protein; forms heteroheptameric complex (with Lsm2p, Lsm3p, Lsm4p, Lsm5p, Lsm6p, and Lsm7p) that is part of spliceosomal U6 snRNP and is also implicated in processing of pre-tRNA, pre-snoRNA, and pre-rRNA	.
	1-to-1	Anc_3.042	CAGL0M03883g		624	0	0	0.045		YNL306W	MRPS18	654	0	0.78		-0.735	inviable	Mitochondrial ribosomal protein of the small subunit; essential for viability, unlike most other mitoribosomal proteins	.
	1-to-1	Anc_2.129	CAGL0K09768g		1455	0	0	0.165		YNL137C	NAM9	1461	0	0.345		-0.18	inviable	Mitochondrial ribosomal component of the small subunit	.
	1-to-1	Anc_3.278	CAGL0K12056g		708	10.3814	0	0.055		YDR041W	RSM10	612	0	0.34		-0.285	inviable	Mitochondrial ribosomal protein of the small subunit; has similarity to E. coli S10 ribosomal protein; essential for viability, unlike most other mitoribosomal proteins	.
	1-to-1	Anc_5.565	CAGL0G07205g		964	0	0	0.095		YML025C	YML6	960	0	0.52		-0.425	inviable	Mitochondrial ribosomal protein of the large subunit; has similarity to E. coli L4 ribosomal protein and human mitoribosomal MRP-L4 protein; essential for viability, unlike most other mitoribosomal proteins	.
	1-to-1	Anc_7.396	CAGL0A04543g		1092	4.67033	0	0.075		YBL074C	AAR2	1068	0	0.63		-0.555	inviable	Component of the U5 snRNP complex; required for splicing of U3 precursors; originally described as a splicing factor specifically required for splicing pre-mRNA of the MATa1 cistron	spliceosomal complex
	1-to-1	Anc_8.780	CAGL0M05181g		1266	5.56872	0	0.31		YMR240C	CUS1	1311	0	0.84		-0.53	inviable	Protein required for assembly of U2 snRNP into the spliceosome; forms a complex with Hsh49p and Hsh155p	spliceosomal complex
	1-to-1	Anc_8.466	CAGL0J09592g		921	9.60912	0	0.275		YDL209C	CWC2	1020	0	0.998333		-0.723333	inviable	Member of the NineTeen Complex (NTC); this complex contains Prp19p and stabilizes U6 snRNA in catalytic forms of the spliceosome containing U2, U5, and U6 snRNAs; binds directly to U6 snRNA; similar to S. pombe Cwf2	spliceosomal complex
	1-to-1	Anc_5.016	CAGL0G00330g		945	0	0	0.115		YGR278W	CWC22	1734	0	0.895		-0.78	inviable	Spliceosome-associated protein that is required for pre-mRNA splicing; necessary for Prp2p function at the first catalytic step of splicing; has similarity to S. pombe Cwf22p; CWC22 is an essential protein	spliceosomal complex
	1-to-1	Anc_1.092	CAGL0I09526g		891	0.224467	0	0.015		YGL128C	CWC23	852	0	0.72		-0.705	inviable	Component of a complex containing Cef1p; putatively involved in pre-mRNA splicing; has similarity to E. coli DnaJ and other DnaJ-like proteins and to S. pombe Cwf23p	spliceosomal complex
	1-to-1	Anc_1.117	CAGL0J07700g		531	0.188324	0	0.48		YNL245C	CWC25	540	0	0.67		-0.19	inviable	Splicing factor required for the first step of pre-mRNA splicing; binding to the spliceosome requires Prp2p and Yju2p; heat-stable protein; has similarity to S. pombe Cwf25p	spliceosomal complex
	1-to-1	Anc_8.469	CAGL0K11198g		1749	1.57233	0	0.12		YDR243C	PRP28	1767	0	0.985		-0.865	inviable	RNA helicase in the DEAD-box family; involved in RNA isomerization at the 5' splice site	spliceosomal complex
	1-to-1	Anc_7.060	CAGL0M11814g		1245	0.160643	0	0.135		YAL032C	PRP45	1140	0	0.67		-0.535	inviable	Protein required for pre-mRNA splicing; associates with the spliceosome and interacts with splicing factors Prp22p and Prp46p; orthologous to human transcriptional coactivator SKIP and can activate transcription of a reporter gene	spliceosomal complex
	1-to-1	Anc_3.406	CAGL0K08074g		324	0	0	0.035		YPR094W	RDS3	324	0	0.575		-0.54	inviable	Component of the SF3b subcomplex of the U2 snRNP; zinc cluster protein involved in pre-mRNA splicing and cycloheximide resistance	spliceosomal complex
	1-to-1	Anc_8.097	CAGL0L09174g		1284	1.86916	0	0		YFR005C	SAD1	1347	0	0.999545		-0.999545	inviable	Conserved zinc-finger domain protein involved in pre-mRNA splicing; required for assembly of U4 snRNA into the U4/U6 particle	spliceosomal complex
	1-to-1	Anc_7.250	CAGL0M12573g		900	5.94444	0	0.145		YIL061C	SNP1	903	0	0.77		-0.625	inviable	Component of U1 snRNP required for mRNA splicing via spliceosome; substrate of the arginine methyltransferase Hmt1p; may interact with poly(A) polymerase to regulate polyadenylation; homolog of human U1 70K protein; protein abundance increases in response to DNA replication stress	spliceosomal complex
	1-to-1	Anc_4.149	CAGL0F08811g		1842	4.45168	0	0.245		YGR013W	SNU71	1863	0	0.655		-0.41	inviable	Component of U1 snRNP required for mRNA splicing via spliceosome; yeast specific, no metazoan counterpart	spliceosomal complex
	1-to-1	Anc_5.519	CAGL0F02915g		2508	0	0	0.045		YDR416W	SYF1	2580	0	0.755		-0.71	inviable	Member of the NineTeen Complex (NTC); that contains Prp19p and stabilizes U6 snRNA in catalytic forms of the spliceosome containing U2, U5, and U6 snRNAs; null mutant has splicing defect and arrests in G2/M; relocalizes to the cytosol in response to hypoxia; homologs in human and C. elegans	spliceosomal complex
	1-to-1	Anc_8.327	CAGL0M04345g		963	0	0	0.175		YLR132C	USB1	873	0	0.62		-0.445	inviable	Putative phosphodiesterase specific for U6 snRNA 3' end modification; trims the 3' poly(u) tract to leave a terminal 3' phosphate; human homolog, hUSB1 (aka C16orf57) produces a 2',3' cyclic phosphate; mutations in hUSB1 are associated with a rare skin condition (OMIM 604173); essential protein that localizes to the nucleus and mitochondria; overexpression suppresses the respiratory defects of ox…	spliceosomal complex
	1-to-1	Anc_6.094	CAGL0I00528g		672	2.30655	0	0.46		YLR298C	YHC1	696	0	0.66		-0.2	inviable	Component of the U1 snRNP complex required for pre-mRNA splicing; putative ortholog of human U1C protein, which is involved in formation of a complex between U1 snRNP and the pre-mRNA 5' splice site	spliceosomal complex
	1-to-1	Anc_1.191	CAGL0I06116g		2043	1.19922	0	0.02		YJL156C	SSY5	2100	0	0.735		-0.715	inviable	Serine protease of SPS plasma membrane amino acid sensor system; contains an inhibitory domain that dissociates in response to extracellular amino acids, freeing a catalytic domain to activate transcription factor Stp1p; other members are Ssy1p and Ptr3p	SPS
	1-to-1	Anc_8.342	CAGL0E01089g		2562	0	0	0		YDR160W	SSY1	2559	0	0.735		-0.735	inviable	Component of the SPS plasma membrane amino acid sensor system; senses external amino acid concentration and transmits intracellular signals that result in regulation of expression of amino acid permease genes; other members are Ssy1p, Ptr3p, and Ssy5p	SPS
	1-to-1	Anc_1.348	CAGL0I09130g		2181	0.550206	0	0		YFR029W	PTR3	2037	0	0.955		-0.955	inviable	Component of the SPS plasma membrane amino acid sensor system; senses external amino acid concentration and transmits intracellular signals that result in regulation of expression of amino acid permease genes; other members are Ssy1p, Ptr3p, and Ssy5p	SPS
	1-to-1	Anc_1.001	CAGL0B00242g		555	100	100	1		YCL066W	HMLALPHA1	528	100	0.943106		0.0568942		Silenced copy of ALPHA1 at HML; ALPHA1 encodes a transcriptional coactivator involved in the regulation of mating-type alpha-specific gene expression	high unmappable
	1-to-1	Anc_1.002	CAGL0B00264g	MTLalpha2	633	76.8562	65.0079	1		YCL067C	HMLALPHA2	633	100	0.943106		0.0568942		Silenced copy of ALPHA2 at HML; homeobox-domain protein that associates with Mcm1p in haploid cells to repress a-specific gene expression and interacts with a1p in diploid cells to repress haploid-specific gene expression	high unmappable
	1-to-1	Anc_1.121	CAGL0B01243g	MATalpha1	432	100	100	1		YCR040W	MATALPHA1	528	100	0.943106		0.0568942		Transcriptional co-activator that regulates mating-type-specific genes; targets the transcription factor Mcm1p to the promoters of alpha-specific genes; one of two genes encoded by the MATalpha mating type cassette	high unmappable
	1-to-1	Anc_1.122	CAGL0B01265g	MATalpha2	561	80.6595	82.2638	0.42		YCR039C	MATALPHA2	633	98.1833	0.88		-0.46		Homeobox-domain protein; with Mcm1p, represses a-specific genes in haploids; acts with A1p to repress transcription of haploid-specific genes in diploids; one of two genes encoded by the MATalpha mating type cassette	high unmappable
	1-to-1	Anc_7.161	CAGL0H09614g		711	83.3333	83.5443	0.845		YER011W	TIR1	765	8.36601	0		0.845		Cell wall mannoprotein; expression is downregulated at acidic pH and induced by cold shock and anaerobiosis; abundance is increased in cells cultured without shaking; member of the Srp1p/Tip1p family of serine-alanine-rich proteins	high unmappable
	1-to-1	Anc_4.016	CAGL0D05082g		1602	84.8627	71.8477	0.84		YLL039C	UBI4	1146	13.089	0		0.84		Ubiquitin; becomes conjugated to proteins, marking them for selective degradation via the ubiquitin-26S proteasome system; essential for the cellular stress response; encoded as a polyubiquitin precursor comprised of 5 head-to-tail repeats; protein abundance increases in response to DNA replication stress	high unmappable
	1-to-1	Anc_8.439	CAGL0K11440g		396	76.6414	40.9091	0.87		YDR225W	HTA1	399	0	0.095		0.775		Histone H2A; core histone protein required for chromatin assembly and chromosome function; one of two nearly identical subtypes (see also HTA2); DNA damage-dependent phosphorylation by Mec1p facilitates DNA repair; acetylated by Nat4p	high unmappable
	1-to-1	Anc_4.093	CAGL0A01408g		1446	95.2282	74.1355	0.82		YGL025C	PGD1	1194	0	0.06		0.76		Subunit of the RNA polymerase II mediator complex; associates with core polymerase subunits to form the RNA polymerase II holoenzyme; essential for basal and activated transcription; direct target of Cyc8p-Tup1p transcriptional corepressor	high unmappable
	1-to-1	Anc_4.282	CAGL0D00484g		1392	0	0	0.98		YKL184W	SPE1	1401	0	0		0.98		Ornithine decarboxylase; catalyzes the first step in polyamine biosynthesis; degraded in a proteasome-dependent manner in the presence of excess polyamines; deletion decreases lifespan, and increases necrotic cell death and ROS generation	spermidine
	1-to-1	Anc_8.800	CAGL0H02607g	SPE2	1221	0	0	0.98		YOL052C	SPE2	1191	0	0		0.98		S-adenosylmethionine decarboxylase; required for the biosynthesis of spermidine and spermine; cells lacking Spe2p require spermine or spermidine for growth in the presence of oxygen but not when grown anaerobically	spermidine
	1-to-1	Anc_3.363	CAGL0D01408g	SPE3	882	1.24717	0	0.905		YPR069C	SPE3	882	0	0		0.905		Spermidine synthase; involved in biosynthesis of spermidine and also in biosynthesis of pantothenic acid; spermidine is required for growth of wild-type cells	spermidine
	1-to-1	Anc_8.063	CAGL0F02035g	CTF19	1122	2.36185	0	1		YPL018W	CTF19	1110	0	0		1		Outer kinetochore protein, needed for accurate chromosome segregation; component of the kinetochore sub-complex COMA (Ctf19p, Okp1p, Mcm21p, Ame1p) that functions as a platform for kinetochore assembly; orthologous to human centromere constitutive-associated network (CCAN) subunit CENP-P and fission yeast fta2	kinetochore
	1-to-1	Anc_5.615	CAGL0H08217g		978	0	0	0.99		YOR026W	BUB3	1026	0	0		0.99		Kinetochore checkpoint WD40 repeat protein; localizes to kinetochores during prophase and metaphase, delays anaphase in the presence of unattached kinetochores; forms complexes with Mad1p-Bub1p and with Cdc20p, binds Mad2p and Mad3p	kinetochore
	1-to-1	Anc_3.473	CAGL0D04862g		2760	0	0	0.965		YPR135W	CTF4	2784	0	0		0.965		Chromatin-associated protein; required for sister chromatid cohesion; interacts with DNA polymerase alpha (Pol1p) and may link DNA synthesis to sister chromatid cohesion	kinetochore
	1-to-1	Anc_3.479	CAGL0D04994g	KAR3	2079	0	0	0.97		YPR141C	KAR3	2190	0	0.03		0.94		Minus-end-directed microtubule motor; functions in mitosis and meiosis, localizes to the spindle pole body and localization is dependent on functional Cik1p, required for nuclear fusion during mating; potential Cdc28p substrate	kinetochore
	1-to-1	Anc_4.366	CAGL0M00440g		699	0	0	0.885		YJR135C	MCM22	720	0	0		0.885		Outer kinetochore protein and component of the Ctf3 subcomplex; binds to centromeric DNA in a Ctf19p-dependent manner; involved in chromosome segregation and minichromosome maintenance; orthologous to human centromere constitutive-associated network (CCAN) subunit CENP-K and fission yeast sim4	kinetochore
	1-to-1	Anc_2.620	CAGL0F06391g		1005	0.199005	0	0.865		YMR055C	BUB2	921	0	0		0.865		Mitotic exit network regulator; forms GTPase-activating Bfa1p-Bub2p complex that binds Tem1p and spindle pole bodies, blocks cell cycle progression before anaphase in response to spindle and kinetochore damage	kinetochore
	1-to-1	Anc_1.508	CAGL0H01815g	CBF1	1332	0	0	0.985		YJR060W	CBF1	1056	0	0		0.985		Basic helix-loop-helix (bHLH) protein; forms homodimer to bind E-box consensus sequence CACGTG present at MET gene promoters and centromere DNA element I (CDEI); affects nucleosome positioning at this motif; associates with other transcription factors such as Met4p and Isw1p to mediate transcriptional activation or repression; associates with kinetochore proteins, required for chromosome segregat…	kinetochore
	1-to-1	Anc_5.349	CAGL0H07139g		1077	0	0	0.64		YDR318W	MCM21	1190	0	0		0.64		Component of the kinetochore sub-complex COMA; COMA (Ctf19p, Okp1p, Mcm21p, Ame1p) bridges kinetochore subunits in contact with centromeric DNA with subunits bound to microtubules during kinetochore assembly; involved in minichromosome maintenance; orthologous to human centromere constitutive-associated network (CCAN) subunit CENP-O and fission yeast mal2	kinetochore
	1-to-1	Anc_6.016	CAGL0B03641g		2967	0.16852	0	1		YEL061C	CIN8	3003	0	0.11		0.89		Kinesin motor protein; involved in mitotic spindle assembly and chromosome segregation	kinetochore
	1-to-1	Anc_2.634	CAGL0L05126g		1176	0	0	1		YKL080W	VMA5	1179	0	0.91		0.09		Subunit C of the V1 peripheral membrane domain of V-ATPase; part of the electrogenic proton pump found throughout the endomembrane system; required for the V1 domain to assemble onto the vacuolar membrane; the V1 peripheral membrane domain of vacuolar H+-ATPase (V-ATPase) has eight subunits	VMA
	1-to-1	Anc_1.469	CAGL0I01562g		483	0.517598	0	1		YEL027W	VMA3	483	0	0.785		0.215		Proteolipid subunit c of the V0 domain of vacuolar H(+)-ATPase; dicyclohexylcarbodiimide binding subunit; required for vacuolar acidification and important for copper and iron metal ion homeostasis	VMA
	1-to-1	Anc_6.260	CAGL0E06204g		495	0	0	0.995		YPL234C	VMA11	495	0	0.665		0.33		Vacuolar ATPase V0 domain subunit c'; involved in proton transport activity; hydrophobic integral membrane protein (proteolipid) containing four transmembrane segments; N and C termini are in the vacuolar lumen	VMA
	1-to-1	Anc_1.413	CAGL0H03938g		418	0	0	0.94		YCL005W-A	VMA9	395	0	0.875		0.065		Vacuolar H+ ATPase subunit e of the V-ATPase V0 subcomplex; essential for vacuolar acidification; interacts with the V-ATPase assembly factor Vma21p in the ER; involved in V0 biogenesis	VMA
	1-to-1	Anc_3.388	CAGL0C00649g	VMA2	1530	0	0	0.91		YBR127C	VMA2	1554	0	0.32		0.59		Subunit B of V1 peripheral membrane domain of vacuolar H+-ATPase; an electrogenic proton pump found throughout the endomembrane system; contains nucleotide binding sites; also detected in the cytoplasm; protein abundance increases in response to DNA replication stress	VMA
	1-to-1	Anc_4.338	CAGL0M00660g		1038	0	0	0.895		YLR447C	VMA6	1038	0	0.875		0.02		Subunit d of the V0 integral membrane domain of V-ATPase; part of the electrogenic proton pump found in the endomembrane system; required for V1 domain assembly on the vacuolar membrane; the V0 integral membrane domain of vacuolar H+-ATPase (V-ATPase) has five subunits	VMA
	1-to-1	Anc_2.453	CAGL0K11594g	VPH2	630	3.96825	0	0.885		YKL119C	VPH2	648	0	0.705		0.18		Integral membrane protein required for V-ATPase function; not an actual component of the vacuolar H+-ATPase (V-ATPase) complex; functions in the assembly of the V-ATPase; localized to the endoplasmic reticulum (ER)	VMA
	1-to-1	Anc_7.063	CAGL0E05346g		702	0	0	0.859282		YOR332W	VMA4	702	0	0.805		0.0542823		Subunit E of the V1 domain of the vacuolar H+-ATPase (V-ATPase); V-ATPase is an electrogenic proton pump found throughout the endomembrane system; V1 domain has eight subunits; required for the V1 domain to assemble onto the vacuolar membrane; protein abundance increases in response to DNA replication stress	VMA
	1-to-1	Anc_5.518	CAGL0J11880g		789	0	0	0.85		YEL051W	VMA8	771	0	0.835		0.015		Subunit D of the V1 peripheral membrane domain of V-ATPase; part of the electrogenic proton pump found throughout the endomembrane system; plays a role in the coupling of proton transport and ATP hydrolysis; the V1 peripheral membrane domain of the vacuolar H+-ATPase (V-ATPase) has eight subunits	VMA
	1-to-1	Anc_5.330	CAGL0D03784g		504	0	0	0.815		YHR060W	VMA22	546	0	0.895		-0.08		Protein that is required for vacuolar H+-ATPase (V-ATPase) function; peripheral membrane protein; not an actual component of the V-ATPase complex; functions in the assembly of the V-ATPase; localized to the yeast endoplasmic reticulum (ER)	VMA
	1-to-1	Anc_3.449	CAGL0G07881g		237	0	0	0.715		YGR105W	VMA21	234	0	0.943106		-0.228106		Integral membrane protein required for V-ATPase function; not an actual component of the vacuolar H+-ATPase (V-ATPase) complex; functions in the assembly of the V-ATPase; localized to the yeast endoplasmic reticulum (ER)	VMA
	1-to-1	Anc_5.304	CAGL0F08987g		746	0	0	0.7		YHR039C-A	VMA10	507	0	0.765		-0.065		Subunit G of the V1 peripheral membrane domain of V-ATPase; part of the electrogenic proton pump found throughout the endomembrane system; involved in vacuolar acidification; the V1 peripheral membrane domain of the vacuolar H+-ATPase (V-ATPase) has eight subunits	VMA
	1-to-1	Anc_7.300	CAGL0I03960g	VMA1	3102	0.128949	0	0.53		YDL185W	VMA1	3216	0	0.84		-0.31		Subunit A of the V1 peripheral membrane domain of V-ATPase; protein precursor undergoes self-catalyzed splicing to yield the extein Tfp1p and the intein Vde (PI-SceI), which is a site-specific endonuclease; the V1 peripheral membrane domain of the vacuolar H+-ATPase (V-ATPase) has eight subunits	VMA
	1-to-1	Anc_4.157	CAGL0D04048g		357	0	0	0.165		YGR020C	VMA7	357	0	0.999545		-0.834545		Subunit F of the V1 peripheral membrane domain of V-ATPase; part of the electrogenic proton pump found throughout the endomembrane system; required for the V1 domain to assemble onto the vacuolar membrane; the V1 peripheral membrane domain of vacuolar H+-ATPase (V-ATPase) has eight subunits	VMA
	1-to-1	Anc_5.270	CAGL0J00627g		636	0	0	0.14		YHR026W	VMA16	642	0	0.943106		-0.803106		Subunit c'' of the vacuolar ATPase; v-ATPase functions in acidification of the vacuole; one of three proteolipid subunits of the V0 domain	VMA
	1-to-1	Anc_7.450	CAGL0K05379g	VMA13	1518	0	0	0.005		YPR036W	VMA13	1437	0	0.055		-0.05		Subunit H of the V1 peripheral membrane domain of V-ATPase; part of the electrogenic proton pump found throughout the endomembrane system; serves as an activator or a structural stabilizer of the V-ATPase; the V1 peripheral membrane domain of the vacuolar H+-ATPase (V-ATPase) has eight subunits	VMA
	1-to-1	Anc_8.718	CAGL0C02959g		2670	1.01124	0	0.035		YOR270C	VPH1	2523	0	0.005		0.03		Subunit a of vacuolar-ATPase V0 domain; one of two isoforms (Vph1p and Stv1p); Vph1p is located in V-ATPase complexes of the vacuole while Stv1p is located in V-ATPase complexes of the Golgi and endosomes; relative distribution to the vacuolar membrane decreases upon DNA replication stress	VMA
	1-to-1	Anc_2.617	CAGL0F06347g	STV1	2733	0	0	0		YMR054W	STV1	2673	0	0		0		Subunit a of the vacuolar-ATPase V0 domain; one of two isoforms (Stv1p and Vph1p); Stv1p is located in V-ATPase complexes of the Golgi and endosomes while Vph1p is located in V-ATPase complexes of the vacuole	VMA
	1-to-1	Anc_8.448	CAGL0J09746g		858	0	0	1		YDL201W	TRM8	861	0	0		1		Noncatalytic subunit of a tRNA methyltransferase complex; Trm8p and Trm82p comprise an enzyme that catalyzes a methyl-transfer from S-adenosyl-l-methionine to the N(7) atom of guanine at position 46 in tRNA; Trm8 lacks catalytic activity if not bound to Trm82p	.
	1-to-1	Anc_8.355	CAGL0E00979g		1266	0.868878	0	1		YDR165W	TRM82	1335	0	0.025		0.975		Catalytic subunit of a tRNA methyltransferase complex; Trm8p and Trm82p comprise an enzyme that catalyzes a methyl-transfer from S-adenosyl-l-methionine to the N(7) atom of guanine at position 46 in tRNA; Trm8 lacks catalytic activity if not bound to Trm82p; relocalizes to the cytosol in response to hypoxia	.
	1-to-1	Anc_2.458	CAGL0K11528g		1065	0	0	1		YKL114C	APN1	1104	0	0		1		Major apurinic/apyrimidinic endonuclease; 3'-repair diesterase; involved in repair of DNA damage by oxidation and alkylating agents; also functions as a 3'-5' exonuclease to repair 7,8-dihydro-8-oxodeoxyguanosine; genetically interacts with NTG1 to maintain mitochondrial genome integrity	.
	1-to-1	Anc_8.081	CAGL0L08844g		2493	0.0401123	0	1		YPL008W	CHL1	2586	0	0		1		Probable DNA helicase; involved in sister-chromatid cohesion and genome integrity and interstrand cross-link repair; interacts with ECO1 and CTF18; mutants are defective in silencing, rDNA recombination, aging and the heat shock response; FANCJ-like helicase family member; mutations in the human homolog, DDX11/ChLR1, cause Warsaw breakage syndrome	.
	1-to-1	Anc_1.070	CAGL0E06556g		1311	0	0	1		YER019W	ISC1	1434	0	0		1		Inositol phosphosphingolipid phospholipase C; mitochondrial membrane localized; hydrolyzes complex sphingolipids to produce ceramide; activated by phosphatidylserine, cardiolipin, and phosphatidylglycerol; mediates Na+ and Li+ halotolerance	.
	1-to-1	Anc_8.625	CAGL0L02805g		1296	0	0	1		YOR209C	NPT1	1290	0	0		1		Nicotinate phosphoribosyltransferase; acts in the salvage pathway of NAD+ biosynthesis; required for silencing at rDNA and telomeres and has a role in silencing at mating-type loci; localized to the nucleus	.
	1-to-1	Anc_3.029	CAGL0M04059g		1053	0	0	1		YNL316C	PHA2	1005	0	0		1		Prephenate dehydratase; catalyzes the conversion of prephanate to phenylpyruvate, which is a step in the phenylalanine biosynthesis pathway	.
	1-to-1	Anc_1.453	CAGL0I03080g	URA3	798	0	0	1		YEL021W	URA3	804	0	0		1		Orotidine-5'-phosphate (OMP) decarboxylase; catalyzes the sixth enzymatic step in the de novo biosynthesis of pyrimidines, converting OMP into uridine monophosphate (UMP); converts 5-FOA into 5-fluorouracil, a toxic compound	.
	1-to-1	Anc_5.687	CAGL0K05555g		693	0	0	0.99		YOR078W	BUD21	645	0	0		0.99		Component of small ribosomal subunit (SSU) processosome; this complex contains U3 snoRNA; originally isolated as bud-site selection mutant that displays a random budding pattern	.
	1-to-1	Anc_7.074	CAGL0G06226g		3957	0	0	0.99		YAL024C	LTE1	4308	0	0.01		0.98		Protein similar to GDP/GTP exchange factors; without detectable GEF activity; required for asymmetric localization of Bfa1p at daughter-directed spindle pole bodies and for mitotic exit at low temperatures	.
	1-to-1	Anc_3.080	CAGL0I02992g		426	0	0	0.975		YNL281W	HCH1	462	0	0		0.975		Heat shock protein regulator; binds to Hsp90p and may stimulate ATPase activity; originally identified as a high-copy number suppressor of a HSP90 loss-of-function mutation; GFP-fusion protein localizes to the cytoplasm and nucleus; protein abundance increases in response to DNA replication stress	.
	1-to-1	Anc_8.832	CAGL0F03443g		939	0.212993	0	0.975		YMR274C	RCE1	948	0	0		0.975		Type II CAAX prenyl protease; involved in the proteolysis and maturation of Ras and the a-factor mating pheromone	.
	1-to-1	Anc_5.403	CAGL0H04389g		558	0	0	0.97		YHR100C	GEP4	558	0	0		0.97		Mitochondrial phosphatidylglycerophosphatase (PGP phosphatase); dephosphorylates phosphatidylglycerolphosphate to generate phosphatidylglycerol, an essential step during cardiolipin biosynthesis; null mutant is sensitive to tunicamycin, DTT	.
	1-to-1	Anc_8.399	CAGL0G08316g	ARV1	927	0	0	0.975		YLR242C	ARV1	966	0	0.01		0.965		Cortical ER protein; implicated in the membrane insertion of tail-anchored C-terminal single transmembrane domain proteins; may function in transport of glycosylphosphatidylinositol intermediates into ER lumen; required for normal intracellular sterol distribution; human ARV1 required for normal cholesterol and bile acid homeostasis; similar to Nup120p	.
	1-to-1	Anc_1.529	CAGL0F00319g		570	0	0	0.965		YJR074W	MOG1	657	0	0		0.965		Conserved nuclear protein that interacts with GTP-Gsp1p; stimulates nucleotide release from Gsp1p; involved in nuclear protein import; nucleotide release is inhibited by Yrb1p	.
	1-to-1	Anc_6.252	CAGL0D03652g		2106	0.759734	0	0.965		YMR179W	SPT21	2277	0	0		0.965		Protein with a role in transcriptional silencing; required for normal transcription at several loci including HTA2-HTB2 and HHF2-HHT2, but not required at the other histone loci; functionally related to Spt10p; localizes to nuclear foci that become diffuse upon DNA replication stress	.
	1-to-1	Anc_6.249	CAGL0H08800g		447	0.223714	0	0.99		YPL225W		441	0	0.025		0.965		Protein of unknown function; may interact with ribosomes, based on co-purification experiments; green fluorescent protein (GFP)-fusion protein localizes to the cytoplasm; protein abundance increases in response to DNA replication stress	.
	1-to-1	Anc_8.275	CAGL0B01903g		576	0	0	0.965		YDR121W	DPB4	591	0	0.005		0.96		Subunit of DNA pol epsilon and of ISW2 chromatin accessibility complex; involved in both chromosomal DNA replication and inheritance of telomeric silencing; stabilizes the interaction of Pol epsilon with primer-template DNA, positively affecting the processivity of the polymerase and exonuclease activities of Pol epsilon; interacts with extranucleosomal DNA and acts as anchor point for ISW2 compl…	.
	1-to-1	Anc_4.306	CAGL0J04774g		1096	0	0	0.96		YLR426W	TDA5	1052	0	0		0.96		Putative protein of unknown function; detected in highly purified mitochondria in high-throughput studies; proposed to be involved in resistance to mechlorethamine and streptozotocin; null mutant sensitive to expression of top1-T722A allele	.
	1-to-1	Anc_5.658	CAGL0L10252g		2538	0	0	0.955		YOR058C	ASE1	2658	0	0		0.955		Mitotic spindle midzone-localized microtubule bundling protein; microtubule-associated protein (MAP) family member; required for spindle elongation and stabilization; undergoes cell cycle-regulated degradation by anaphase promoting complex; potential Cdc28p substrate; relative distribution to microtubules decreases upon DNA replication stress	.
	1-to-1	Anc_8.143	CAGL0L06050g		819	0	0	0.96		YGL183C	MND1	743	0	0.01		0.95		Protein required for recombination and meiotic nuclear division; forms a complex with Hop2p, which is involved in chromosome pairing and repair of meiotic double-strand breaks	.
	1-to-1	Anc_1.234	CAGL0L05478g		741	0	0	0.95		YJL121C	RPE1	717	0	0		0.95		D-ribulose-5-phosphate 3-epimerase; catalyzes a reaction in the non-oxidative part of the pentose-phosphate pathway; mutants are sensitive to oxidative stress	.
	1-to-1	Anc_2.320	CAGL0H10494g		2175	2.11494	0	0.995		YDL116W	NUP84	2181	0	0.05		0.945		Subunit of the Nup84p subcomplex of the nuclear pore complex (NPC); contributes to nucleocytoplasmic transport and NPC biogenesis; also plays roles in several processes that may require localization of genes or chromosomes at the nuclear periphery, including double-strand break repair, transcription and chromatin silencing; homologous to human NUP107	.
	1-to-1	Anc_7.043	CAGL0D02200g		3219	0.341721	0	0.94		YOR349W	CIN1	3045	0	0		0.94		Tubulin folding factor D involved in beta-tubulin (Tub2p) folding; isolated as mutant with increased chromosome loss and sensitivity to benomyl	.
	1-to-1	Anc_5.581	CAGL0E04246g		528	0	0	0.935		YML036W	CGI121	652	0	0		0.935		Component of the EKC/KEOPS complex; EKC/KEOPS complex is required for t6A tRNA modification and may have roles in telomere maintenance and transcription; Cgi121p is dispensable for tRNA modification; other complex members are Bud32p, Kae1p, Pcc1p, and Gon7p	.
	1-to-1	Anc_8.304	CAGL0B01639g		2034	0	0	0.94		YDR137W	RGP1	1992	0	0.005		0.935		Subunit of a Golgi membrane exchange factor (Ric1p-Rgp1p); this complex catalyzes nucleotide exchange on Ypt6p	.
	1-to-1	Anc_8.778	CAGL0I09614g		3120	0	0	0.93		YOR304W	ISW2	3363	0	0		0.93		ATP-dependent DNA translocase involved in chromatin remodeling; ATPase component that, with Itc1p, forms a complex required for repression of a-specific genes, INO1, and early meiotic genes during mitotic growth; the Isw2 complex exhibits basal levels of chromatin binding throughout the genome as well as target-specific chromatin interactions	.
	1-to-1	Anc_5.689	CAGL0K05599g		2133	0	0	0.96		YOR080W	DIA2	2199	0	0.045		0.915		Origin-binding F-box protein; forms SCF ubiquitin ligase complex with Skp1p and Cdc53p; required to target Cdc6p for ubiquitin-mediated destruction during G1 phase; required for deactivation of Rad53 checkpoint kinase, completion of DNA replication during recovery from DNA damage; required for assembly of RSC complex, RSC-mediated transcription regulation, and nucleosome positioning; involved in …	.
	1-to-1	Anc_5.612	CAGL0H08239g		1305	0.0766284	0	0.905		YOR025W	HST3	1344	0	0		0.905		Member of the Sir2 family of NAD(+)-dependent protein deacetylases; involved along with Hst4p in telomeric silencing, cell cycle progression, radiation resistance, genomic stability and short-chain fatty acid metabolism	.
	1-to-1	Anc_3.068	CAGL0M03597g	MID1	1776	0.112613	0	0.91		YNL291C	MID1	1647	0	0.01		0.9		N-glycosylated integral membrane protein of the ER and plasma membrane; functions as a stretch-activated Ca2+-permeable cation channel required for Ca2+ influx stimulated by pheromone; interacts with Cch1p; forms an oligomer	.
	1-to-1	Anc_5.052	CAGL0M13387g		780	0	0	0.9		YHR185C	PFS1	714	0	0		0.9		Sporulation protein required for prospore membrane formation; required for prospore membrane formation at selected spindle poles; ensures functionality of all four spindle pole bodies during meiosis II; not required for meiotic recombination or meiotic chromosome segregation	.
	1-to-1	Anc_7.409	CAGL0A04565g	SWI4	3126	0	0	0.915		YER111C	SWI4	3282	0	0.015		0.9		DNA binding component of the SBF complex (Swi4p-Swi6p); a transcriptional activator that in concert with MBF (Mbp1-Swi6p) regulates late G1-specific transcription of targets including cyclins and genes required for DNA synthesis and repair; Slt2p-independent regulator of cold growth; acetylation at two sites, K1016 and K1066, regulates interaction with Swi6p	.
	1-to-1	Anc_2.459	CAGL0K11506g		1146	3.35951	0	0.89		YKL113C	RAD27	1149	0	0		0.89		5' to 3' exonuclease, 5' flap endonuclease; required for Okazaki fragment processing and maturation, for long-patch base-excision repair and large loop repair (LLR); member of the S. pombe RAD2/FEN1 family; relocalizes to the cytosol in response to hypoxia	.
	1-to-1	Anc_5.462	CAGL0A03168g		330	0	0	0.93		YDR382W	RPP2B	333	0	0.04		0.89		Ribosomal protein P2 beta; a component of the ribosomal stalk, which is involved in the interaction between translational elongation factors and the ribosome; regulates the accumulation of P1 (Rpp1Ap and Rpp1Bp) in the cytoplasm	.
	1-to-1	Anc_5.100	CAGL0L06534g		1755	0	0	0.895		YGR229C	SMI1	1518	0	0.005		0.89		Protein involved in the regulation of cell wall synthesis; proposed to be involved in coordinating cell cycle progression with cell wall integrity	.
	1-to-1	Anc_8.821	CAGL0J06534g		5013	0.0199481	0	0.885		YML103C	NUP188	4968	0	0		0.885		Subunit of the inner ring of the nuclear pore complex (NPC); contributes to NPC organization and nucleocytoplasmic transport; homologous to human NUP188	.
	1-to-1	Anc_2.160	CAGL0I02772g		804	0	0	0.885		YOR115C	TRS33	807	0	0		0.885		One of 10 subunits of the transport protein particle (TRAPP) complex; the TRAPP complex is of the cis-Golgi and mediates vesicle docking and fusion; involved in endoplasmic reticulum (ER) to Golgi membrane traffic	.
	1-to-1	Anc_3.386	CAGL0J09812g	TPS1	1476	0	0	0.945		YBR126C	TPS1	1488	0	0.07		0.875		Synthase subunit of trehalose-6-P synthase/phosphatase complex; synthesizes the storage carbohydrate trehalose; also found in a monomeric form; expression is induced by the stress response and repressed by the Ras-cAMP pathway; protein abundance increases in response to DNA replication stress and in response to prolonged exposure to boric acid	.
	1-to-1	Anc_8.416	CAGL0F05357g		1806	0	0	0.92		YDR207C	UME6	2511	0	0.05		0.87		Component of the Rpd3L histone deacetylase complex; key transcriptional regulator of early meiotic genes, binds URS1 upstream regulatory sequence, couples metabolic responses to nutritional cues with initiation and progression of meiosis, forms complex with Ime1p	.
	1-to-1	Anc_4.339	CAGL0L11418g		1695	0.530973	0	0.86		YML071C	COG8	1824	0	0		0.86		Component of the conserved oligomeric Golgi complex; a cytosolic tethering complex (Cog1p through Cog8p) that functions in protein trafficking to mediate fusion of transport vesicles to Golgi compartments	.
	1-to-1	Anc_2.618	CAGL0F06369g		2670	2.80899	0	0.89		YKL073W	LHS1	2646	0	0.03		0.86		Molecular chaperone of the endoplasmic reticulum lumen; involved in polypeptide translocation and folding; nucleotide exchange factor for the ER lumenal Hsp70 chaperone Kar2p; regulated by the unfolded protein response pathway	.
	1-to-1	Anc_2.587	CAGL0M13057g		270	0	0	0.91		YKL053C-A	MDM35	261	0	0.055		0.855		Mitochondrial intermembrane space protein; mutation affects mitochondrial distribution and morphology; contains twin cysteine-x9-cysteine motifs; protein abundance increases in response to DNA replication stress	.
	1-to-1	Anc_5.694	CAGL0G02409g	SRP40	1116	30.914	0	0.91		YKR092C	SRP40	1221	0	0.055		0.855		Nucleolar serine-rich protein; role in preribosome assembly or transport; may function as a chaperone of small nucleolar ribonucleoprotein particles (snoRNPs); immunologically and structurally to rat Nopp140	.
	1-to-1	Anc_6.100	CAGL0G09493g		4227	0	0	0.87		YOR191W	ULS1	4860	0	0.015		0.855		Protein involved in proteolytic control of sumoylated substrates; contains RING finger domain; interacts with SUMO (Smt3p); member of the SWI/SNF family of DNA-dependent ATPases; plays a role in antagonizing silencing during mating-type switching; relocalizes from nucleus to cytoplasm upon DNA replication stress	.
	1-to-1	Anc_3.553	CAGL0H07931g		798	0	0	0.945		YGL232W	TAN1	928	0	0.095		0.85		Putative tRNA acetyltransferase; RNA-binding protein required for the formation of the modified nucleoside N(4)-acetylcytidine in serine and leucine tRNAs but not required for the same modification in 18S rRNA; protein abundance increases in response to DNA replication stress	.
	1-to-1	Anc_5.480	CAGL0M01540g	SPT3	981	0	0	0.925		YDR392W	SPT3	1014	0	0.08		0.845		Subunit of the SAGA and SAGA-like transcriptional regulatory complexes; interacts with Spt15p to activate transcription of some RNA polymerase II-dependent genes, also functions to inhibit transcription at some promoters; relocalizes to the cytosol in response to hypoxia	.
	1-to-1	Anc_1.447	CAGL0M03289g		618	0	0	0.855		YEL018W	EAF5	840	0	0.01		0.845		Non-essential subunit of the NuA4 acetyltransferase complex; Esa1p-associated factor; relocalizes to the cytosol in response to hypoxia	.
	1-to-1	Anc_2.345	CAGL0F07689g		2460	0.0406504	0	0.87		YMR165C	PAH1	2589	0	0.03		0.84		Mg2+-dependent phosphatidate (PA) phosphatase; dephosphorylates PA to yield diacylglycerol; responsible for de novo lipid synthesis and formation of lipid droplets; phosphorylation by Pho80p-Pho85p decreases catalytic activity and alters Pah1p localization and abundance; phosphorylation by protein kinase A decreases catalytic efficiency; dephosphorylation by Nem1p-Spo7p anchors Pah1p to the membr…	.
	1-to-1	Anc_8.150	CAGL0L06182g		1488	0.235215	0	0.97		YGL190C	CDC55	1581	0	0.135		0.835		Non-essential regulatory subunit B of protein phosphatase 2A (PP2A); localization to the cytoplasm requires Zds1p and Zds2p and promotes mitotic entry; localization to the nucleus prevents mitotic exit; required for correct nuclear division and chromosome segregation in meiosis; maintains nucleolar sequestration of Cdc14p during early meiosis; limits formation of PP2A-Rts1p holocomplexes to ensur…	.
	1-to-1	Anc_1.438	CAGL0L07942g		279	0	0	0.875		YCR020C-A	MAK31	267	0	0.045		0.83		Non-catalytic subunit of N-terminal acetyltransferase of the NatC type; required for replication of dsRNA virus; member of the Sm protein family	.
	1-to-1	Anc_2.623	CAGL0L05060g		1428	0.280112	0	0.845		YKL075C		1353	0	0.015		0.83		Putative protein of unknown function; green fluorescent protein (GFP)-fusion protein localizes to the cytoplasm; proposed to be involved in resistance to streptozotocin and camptothecin	.
	1-to-1	Anc_6.207	CAGL0G09108g		1041	26.3208	0	0.825		YPL199C		723	0	0		0.825		Putative protein of unknown function; predicted to be palmitoylated	.
	1-to-1	Anc_2.557	CAGL0K03267g	OPI1	1464	1.36612	0	0.82		YHL020C	OPI1	1215	0	0		0.82		Transcriptional regulator of a variety of genes; phosphorylation by protein kinase A stimulates Opi1p function in negative regulation of phospholipid biosynthetic genes; involved in telomere maintenance; null exhibits disrupted mitochondrial metabolism and low cardiolipin content, strongly correlated with overproduction of inositol	.
	1-to-1	Anc_3.236	CAGL0I04708g	PDX3	684	2.26608	0	0.975		YBR035C	PDX3	687	0	0.155		0.82		Pyridoxine (pyridoxamine) phosphate oxidase; has homologs in E. coli and Myxococcus xanthus; transcription is under the general control of nitrogen metabolism	.
	1-to-1	Anc_7.352	CAGL0A03971g		321	0	0	0.855		YLR200W	YKE2	345	0	0.04		0.815		Subunit of the heterohexameric Gim/prefoldin protein complex; involved in the folding of alpha-tubulin, beta-tubulin, and actin; prefoldin complex also localizes to chromatin of actively transcribed genes in the nucleus and facilitates transcriptional elongation	.
	1-to-1	Anc_8.429	CAGL0C01177g		1074	0	0	0.925		YLR226W	BUR2	1188	0	0.115		0.81		Cyclin for the Sgv1p (Bur1p) protein kinase; Sgv1p and Bur2p comprise a CDK-cyclin complex involved in transcriptional regulation through its phosphorylation of the carboxy-terminal domain of the largest subunit of RNA polymerase II	.
	1-to-1	Anc_8.191	CAGL0I06743g	FTR1	1227	0	0	0.81		YER145C	FTR1	1215	0	0		0.81		High affinity iron permease; involved in the transport of iron across the plasma membrane; forms complex with Fet3p; expression is regulated by iron; protein abundance increases in response to DNA replication stress	.
	1-to-1	Anc_5.553	CAGL0J10560g		903	0	0	0.965		YDR439W	LRS4	1044	0	0.155		0.81		Nucleolar protein that forms a complex with Csm1p; and then Mam1p at kinetochores during meiosis I to mediate accurate homolog segregation; required for condensin recruitment to the replication fork barrier site and rDNA repeat segregation	.
	1-to-1	Anc_3.197	CAGL0M10351g		1176	0	0	0.83		YDR005C	MAF1	1268	0	0.03		0.8		Highly conserved negative regulator of RNA polymerase III; involved in control of tRNA processing and stability; binds N-terminal domain of Rpc160p subunit of Pol III to prevent closed-complex formation; localization and activity are regulated by phosphorylation, mediated by TORC1, protein kinase A, and Sch9p; localizes to cytoplasm during vegetative growth and translocates to nucleus and nucleol…	.
	1-to-1	Anc_1.512	CAGL0F00561g		387	0	0	0.98		YJR063W	RPA12	378	0	0.195		0.785		RNA polymerase I subunit A12.2; contains two zinc binding domains, and the N terminal domain is responsible for anchoring to the RNA pol I complex	.
	1-to-1	Anc_2.003	CAGL0J07612g	ZWF1	1503	0	0	0.78		YNL241C	ZWF1	1518	0	0		0.78		Glucose-6-phosphate dehydrogenase (G6PD); catalyzes the first step of the pentose phosphate pathway; involved in adapting to oxidatve stress; homolog of the human G6PD which is deficient in patients with hemolytic anemia; protein abundance increases in response to DNA replication stress	.
	1-to-1	Anc_4.374	CAGL0M00330g	HOM6	1089	0.0918274	0	0.835		YJR139C	HOM6	1080	0	0.055		0.78		Homoserine dehydrogenase (L-homoserine:NADP oxidoreductase); dimeric enzyme that catalyzes the third step in the common pathway for methionine and threonine biosynthesis; enzyme has nucleotide-binding, dimerization and catalytic regions	.
	1-to-1	Anc_8.830	CAGL0J06666g		339	0	0	0.93		YML108W		318	0	0.155		0.775		Protein of unknown function; structure defines a new subfamily of the split beta-alpha-beta sandwiches; green fluorescent protein (GFP)-fusion protein localizes to the cytoplasm and nucleus; YML108W is not an essential gene; relative distribution to the nucleus increases upon DNA replication stress	.
	1-to-1	Anc_5.529	CAGL0H04653g	ERG6	1119	0	0	0.78		YML008C	ERG6	1152	0	0.015		0.765		Delta(24)-sterol C-methyltransferase; converts zymosterol to fecosterol in the ergosterol biosynthetic pathway by methylating position C-24; localized to lipid particles, the plasma membrane-associated endoplasmic reticulum, and the mitochondrial outer membrane	.
	1-to-1	Anc_8.725	CAGL0L10934g		1284	0.506231	0	0.765		YOR274W	MOD5	1287	0	0		0.765		Delta 2-isopentenyl pyrophosphate:tRNA isopentenyl transferase; required for biosynthesis of the modified base isopentenyladenosine in mitochondrial and cytoplasmic tRNAs; gene is nuclear and encodes two isozymic forms; converts to a prion form, and prion conversion contributes to azole antifungal resistance by upregulating ergosterol biosynthesis	.
	1-to-1	Anc_4.203	CAGL0K04433g		1086	0	0	0.785		YGR058W	PEF1	1008	0	0.02		0.765		Penta-EF-hand protein; required for polar bud growth and cell wall abscission; binds calcium and zinc with different affinity; localizes to bud site in G1, bud neck in G2; binds to Sec31p and modulates COPII coat assembly	.
	1-to-1	Anc_3.017	CAGL0B01507g	ARG8	1284	0	0	0.76		YOL140W	ARG8	1272	0	0		0.76		Acetylornithine aminotransferase; catalyzes the fourth step in the biosynthesis of the arginine precursor ornithine	.
	1-to-1	Anc_7.004	CAGL0D00220g		570	0	0	0.755		YAL059W	ECM1	639	0	0		0.755		Pre-ribosomal factor involved in 60S ribosomal protein subunit export; associates with the pre-60S particle; shuttles between the nucleus and cytoplasm	.
	1-to-1	Anc_1.489	CAGL0I01342g		1161	2.23945	0	0.92		YEL046C	GLY1	1164	0	0.165		0.755		Threonine aldolase; catalyzes the cleavage of L-allo-threonine and L-threonine to glycine; involved in glycine biosynthesis	.
	1-to-1	Anc_4.278	CAGL0D00550g		1290	0	0	0.795		YKL181W	PRS1	1284	0	0.04		0.755		5-phospho-ribosyl-1(alpha)-pyrophosphate synthetase; synthesizes PRPP, which is required for nucleotide, histidine, and tryptophan biosynthesis; one of five related enzymes, which are active as heteromultimeric complexes	.
	1-to-1	Anc_5.427	CAGL0A02728g		273	27.1062	0	0.76		YDR363W-A	SEM1	270	0	0.03		0.73		Component of lid subcomplex of 26S proteasome regulatory subunit; involved in mRNA export mediated by TREX-2 complex (Sac3p-Thp1p); assumes different conformations in different contexts, functions as molecular glue stabilizing the Rpn3p/Rpn7p regulatory heterodimer, and tethers it to lid helical bundle; ortholog of human DSS1; protein abundance increases in response to DNA replication stress	.
	1-to-1	Anc_1.370	CAGL0K10516g		486	0	0	0.73		YFR011C	AIM13	513	0	0.005		0.725		Mitochondrial protein peripheral to the inner membrane; component of the mitochondrial inner membrane organizing system (MINOS, MitOS, or MICOS), a scaffold-like structure on the intermembrane space side of the inner membrane which has a role in the maintenance of crista junctions and inner membrane architecture	.
	1-to-1	Anc_8.561	CAGL0M06391g		855	0	0	0.72		YBR185C	MBA1	837	0	0		0.72		Membrane-associated mitochondrial ribosome receptor; forms a complex with Mdm38p that may facilitate recruitment of mRNA-specific translational activators to ribosomes; possible role in protein export from the matrix to inner membrane	.
	1-to-1	Anc_2.524	CAGL0L02101g		939	0	0	0.72		YBR290W	BSD2	966	0	0.005		0.715		Heavy metal ion homeostasis protein; facilitates trafficking of Smf1p and Smf2p metal transporters to the vacuole where they are degraded, controls metal ion transport, prevents metal hyperaccumulation, functions in copper detoxification	.
	1-to-1	Anc_8.211	CAGL0K10098g		222	0	0	0.84		YDR079C-A	TFB5	219	0	0.13		0.71		Component of RNA polymerase II general transcription factor TFIIH; involved in transcription initiation and in nucleotide-excision repair; relocalizes to the cytosol in response to hypoxia; homolog of Chlamydomonas reinhardtii REX1-S protein involved in DNA repair	.
	1-to-1	Anc_6.153	CAGL0J10406g		1131	0	0	0.705		YGL105W	ARC1	1131	0	0		0.705		Protein that binds tRNA and methionyl- and glutamyl-tRNA synthetases; involved in tRNA delivery, stimulating catalysis, and ensuring localization; also binds quadruplex nucleic acids; protein abundance increases in response to DNA replication stress; methionyl-tRNA synthetase is Mes1p; glutamyl-tRNA synthetase is Gus1p	.
	1-to-1	Anc_6.376	CAGL0C03443g	LYS9	1341	0	0	0.705		YNR050C	LYS9	1341	0	0		0.705		Saccharopine dehydrogenase (NADP+, L-glutamate-forming); catalyzes the formation of saccharopine from alpha-aminoadipate 6-semialdehyde, the seventh step in lysine biosynthesis pathway; exhibits genetic and physical interactions with TRM112	.
	1-to-1	Anc_8.539	CAGL0M05357g		1674	0.0597372	0	1		YBR200W	BEM1	1656	0	0.3		0.7		Protein containing SH3-domains; involved in establishing cell polarity and morphogenesis; functions as a scaffold protein for complexes that include Cdc24p, Ste5p, Ste20p, and Rsr1p	.
	1-to-1	Anc_2.561	CAGL0M07678g		1422	0	0	0.74		YMR014W	BUD22	1560	0	0.04		0.7		Protein required for rRNA maturation and ribosomal subunit biogenesis; required for 18S rRNA maturation; also required for small ribosomal subunit biogenesis; cosediments with pre-ribosomal particles; mutation decreases efficiency of +1 Ty1 frameshifting and transposition, and affects budding pattern	.
	1-to-1	Anc_8.215	CAGL0K10010g		1179	5.42833	0	0.73		YDR083W	RRP8	1179	0	0.035		0.695		Nucleolar S-adenosylmethionine-dependent rRNA methyltransferase; methylates adenine (m1A) of the large subunit (LSU) rRNA at position 645; involved in pre-rRNA cleavage at site A2; mutation is synthetically lethal with a gar1 mutation; deletion disrupts telomere maintenance by influencing the expression of neighboring gene STN1	.
	1-to-1	Anc_7.504	CAGL0H00550g		495	0	0	0.99		YJR118C	ILM1	612	0	0.3		0.69		Protein of unknown function; may be involved in mitochondrial DNA maintenance; required for slowed DNA synthesis-induced filamentous growth	.
	1-to-1	Anc_5.555	CAGL0G07084g		1035	8.11594	0	0.69		YML021C	UNG1	1080	0	0		0.69		Uracil-DNA glycosylase; required for repair of uracil in DNA formed by spontaneous cytosine deamination; efficiently excises uracil from single-stranded DNA in vivo; not required for strand-specific mismatch repair; cell-cycle regulated, expressed in late G1; localizes to mitochondria and nucleus	.
	1-to-1	Anc_2.660	CAGL0F06809g		1086	1.61142	0	0.805		YIR026C	YVH1	1095	0	0.12		0.685		Protein phosphatase; involved in vegetative growth at low temperatures, sporulation, and glycogen accumulation; mutants are defective in 60S ribosome assembly; member of the dual-specificity family of protein phosphatases	.
	1-to-1	Anc_8.274	CAGL0B01881g		1662	0.0601685	0	0.68		YDR120C	TRM1	1713	0	0		0.68		tRNA methyltransferase; two forms of the protein are made by alternative translation starts; localizes to both the nucleus and mitochondrion to produce the modified base N2,N2-dimethylguanosine in tRNAs in both compartments	.
	1-to-1	Anc_6.230	CAGL0E05786g		801	9.67541	0	0.81		YPL213W	LEA1	717	0	0.15		0.66		Component of U2 snRNP complex; disruption causes reduced U2 snRNP levels; physically interacts with Msl1p; putative homolog of human U2A' snRNP protein	.
	1-to-1	Anc_8.482	CAGL0L12474g	PHO85	909	0	0	1		YPL031C	PHO85	1020	0	0.345		0.655		Cyclin-dependent kinase; has ten cyclin partners; involved in regulating the cellular response to nutrient levels and environmental conditions and progression through the cell cycle	.
	1-to-1	Anc_8.823	CAGL0H02189g		594	10.6902	0	0.96		YMR269W	TMA23	636	0	0.305		0.655		Nucleolar protein implicated in ribosome biogenesis; deletion extends chronological lifespan	.
	1-to-1	Anc_2.402	CAGL0A03564g		2982	0	0	0.755		YLR039C	RIC1	3171	0	0.105		0.65		Protein involved in retrograde transport to the cis-Golgi network; forms heterodimer with Rgp1p that acts as a GTP exchange factor for Ypt6p; involved in transcription of rRNA and ribosomal protein genes	.
	1-to-1	Anc_1.230	CAGL0L05544g		477	0	0	0.645		YJL124C	LSM1	519	0	0		0.645		Lsm (Like Sm) protein; forms heteroheptameric complex (with Lsm2p, Lsm3p, Lsm4p, Lsm5p, Lsm6p, and Lsm7p) involved in degradation of cytoplasmic mRNAs; unlike most Sm-like proteins, Lsm1p requires both its SM-domain and C-terminal domain for RNA-binding; forms cytoplasmic foci upon DNA replication stress	.
	1-to-1	Anc_1.342	CAGL0I09218g		2175	0	0	0.645		YBR260C	RGD1	2001	0	0		0.645		GTPase-activating protein (RhoGAP) for Rho3p and Rho4p; possibly involved in control of actin cytoskeleton organization	.
	1-to-1	Anc_6.052	CAGL0K06039g		2397	0	0	0.645		YLR263W	RED1	2484	0	0.005		0.64		Protein component of the synaptonemal complex axial elements; involved in chromosome segregation during the first meiotic division; critical for coupling checkpoint signaling to SC formation; interacts with Hop1p, Mec3p and Ddc1p	.
	1-to-1	Anc_8.392	CAGL0G08250g		1152	0	0	0.995		YLR244C	MAP1	1164	0	0.36		0.635		Methionine aminopeptidase; catalyzes the cotranslational removal of N-terminal methionine from nascent polypeptides; function is partially redundant with that of Map2p	.
	1-to-1	Anc_3.524	CAGL0K09416g		1077	0.557103	0	0.635		YGL211W	NCS6	1080	0	0		0.635		Protein required for uridine thiolation of Gln, Lys, and Glu tRNAs; required for the thiolation of uridine at the wobble position of Gln, Lys, and Glu tRNAs; has a role in urmylation and in invasive and pseudohyphal growth; inhibits replication of Brome mosaic virus in S. cerevisiae	.
	1-to-1	Anc_4.074	CAGL0A01738g		1410	0	0	0.99		YGL038C	OCH1	1443	0	0.355		0.635		Mannosyltransferase of the cis-Golgi apparatus; initiates the polymannose outer chain elongation of N-linked oligosaccharides of glycoproteins	.
	1-to-1	Anc_8.669	CAGL0J03762g	MET7	1485	0	0	0.625		YOR241W	MET7	1647	0	0		0.625		Folylpolyglutamate synthetase; catalyzes extension of the glutamate chains of the folate coenzymes, required for methionine synthesis and for maintenance of mitochondrial DNA; protein abundance increases in response to DNA replication stress	.
	1-to-1	Anc_2.083	CAGL0J06226g		1527	0	0	0.995		YNL169C	PSD1	1503	0	0.37		0.625		Phosphatidylserine decarboxylase of the mitochondrial inner membrane; converts phosphatidylserine to phosphatidylethanolamine; regulates mitochondrial fusion and morphology by affecting lipid mixing in the mitochondrial membrane and by influencing the ratio of long to short forms of Mgm1p; partly exposed to the mitochondrial intermembrane space	.
	1-to-1	Anc_5.288	CAGL0H01023g		1035	1.73913	0	0.63		YDR279W	RNH202	1053	0	0.005		0.625		Ribonuclease H2 subunit; required for RNase H2 activity; related to human AGS2 that causes Aicardi-Goutieres syndrome	.
	1-to-1	Anc_4.311	CAGL0M00968g		1323	1.70068	0	0.62		YLR431C	ATG23	1362	0	0		0.62		Peripheral membrane protein required for autophagy and CVT; required for cytoplasm-to-vacuole targeting (Cvt) pathway and efficient macroautophagy; cycles between the phagophore assembly site (PAS) and non-PAS locations; forms a complex with Atg9p and Atg27p	.
	1-to-1	Anc_3.237	CAGL0D04422g		1146	0	0	0.945		YPL279C	FEX2	1128	70.9663	0.33		0.615		Protein involved in fluoride export; nearly identical to FEX1, and deletion of both proteins results in a large increase in fluoride sensitivity compared with the single mutant; contains two FEX domains connected by a linker; part of a widespread family of conserved fluoride export proteins	.
	1-to-1	Anc_8.315	CAGL0D02420g		558	0	0	0.98		YLR119W	SRN2	642	0	0.365		0.615		Component of the ESCRT-I complex; ESCRT-I is involved in ubiquitin-dependent sorting of proteins into the endosome; suppressor of rna1-1 mutation; may be involved in RNA export from nucleus	.
	1-to-1	Anc_2.037	CAGL0C05461g		114	0	0	1		YDL232W	OST4	111	0	0.39		0.61		Subunit of the oligosaccharyltransferase complex of the ER lumen; complex catalyzes protein asparagine-linked glycosylation; type I membrane protein required for incorporation of Ost3p or Ost6p into the OST complex	.
	1-to-1	Anc_4.097	CAGL0A00187g		2271	0	0	0.605		YGL023C	PIB2	1908	0	0.005		0.6		Protein of unknown function; contains FYVE domain; similar to Fab1 and Vps27	.
	1-to-1	Anc_6.197	CAGL0G09229g		336	0	0	0.93		YPL192C	PRM3	402	0	0.34		0.59		Protein required for nuclear envelope fusion during karyogamy; pheromone-regulated; localizes to the outer face of the nuclear membrane; interacts with Kar5p at the spindle pole body	.
	1-to-1	Anc_1.227	CAGL0L05610g		1596	0.0313283	0	0.8		YJL127C	SPT10	1923	0	0.21		0.59		Putative histone acetylase with a role in transcriptional silencing; sequence-specific activator of histone genes, binds specifically and cooperatively to pairs of UAS elements in core histone promoters, functions at or near the TATA box	.
	1-to-1	Anc_5.043	CAGL0F08415g		801	0	0	0.99		YGR262C	BUD32	786	0	0.405		0.585		Protein kinase; component of the EKC/KEOPS complex with Kae1p, Cgi121p, Pcc1p, and Gon7p; EKC/KEOPS complex is required for t6A tRNA modification and may have roles in telomere maintenance and transcription	.
	1-to-1	Anc_1.424	CAGL0L07788g		798	0	0	0.9		YCR009C	RVS161	798	0	0.32		0.58		Amphiphysin-like lipid raft protein; interacts with Rvs167p and regulates polarization of the actin cytoskeleton, endocytosis, cell polarity, cell fusion and viability following starvation or osmotic stress	.
	1-to-1	Anc_5.421	CAGL0I01254g		1302	0.15361	0	0.585		YHR111W	UBA4	1323	0	0.005		0.58		Protein that activates Urm1p before urmylation; also acts in thiolation of the wobble base of cytoplasmic tRNAs by adenylating and then thiolating Urm1p; receives sulfur from Tum1p	.
	1-to-1	Anc_6.198	CAGL0G09218g		1140	0	0	0.615		YPL193W	RSA1	1146	0	0.05		0.565		Protein involved in the assembly of 60S ribosomal subunits; functionally interacts with Dbp6p; functions in a late nucleoplasmic step of the assembly	.
	1-to-1	Anc_5.675	CAGL0G02211g		3465	0	0	0.56		YKR082W	NUP133	3474	0	0		0.56		Subunit of Nup84p subcomplex of nuclear pore complex (NPC); contributes to nucleocytoplasmic transport, NPC biogenesis; is involved in establishment of a normal nucleocytoplasmic concentration gradient of GTPase Gsp1p; also plays roles in several processes that may require localization of genes or chromosomes at nuclear periphery, including double-strand break repair, transcription and chromatin …	.
	1-to-1	Anc_5.361	CAGL0H07023g		273	0	0	0.56		YDR322C-A	TIM11	291	0	0		0.56		Subunit e of mitochondrial F1F0-ATPase; ATPase is a large, evolutionarily conserved enzyme complex required for ATP synthesis; essential for the dimeric and oligomeric state of ATP synthase, which in turn determines the shape of inner membrane cristae	.
	1-to-1	Anc_2.234	CAGL0G08778g		609	1.31363	0	0.72		YIL127C	RRT14	621	0	0.16		0.56		Putative protein of unknown function; identified in a screen for mutants with decreased levels of rDNA transcription; green fluorescent protein (GFP)-fusion protein localizes to the nucleolus; predicted to be involved in ribosome biogenesis	.
	1-to-1	Anc_8.273	CAGL0B01875g		225	0	0	0.685		YDR119W-A	COX26	201	0	0.14		0.545		Putative protein of unknown function; copurifies with respiratory chain supercomplexes composed of Complex III (ubiquinol-cytochrome c reductase) and Complex IV (cytochrome c oxidase)	.
	1-to-1	Anc_7.167	CAGL0H09438g		975	0	0	0.53		YER016W	BIM1	1035	0	0		0.53		Microtubule plus end-tracking protein; together with Kar9p makes up the cortical microtubule capture site and delays the exit from mitosis when the spindle is oriented abnormally	.
	1-to-1	Anc_2.609	CAGL0F06215g		1350	0	0	0.53		YMR044W	IOC4	1428	0	0		0.53		Member of a complex (Isw1b) with Isw1p and Ioc2p; interacts directly with H3K36me3 nucleosomes through its PWWP domain to recruit the Isw1b complex to open reading frames in a Set2p-dependent manner; Isw1b exhibits nucleosome-stimulated ATPase activity and acts within coding regions to coordinate transcription elongation with termination and processing	.
	1-to-1	Anc_7.137	CAGL0L02409g		873	0.114548	0	0.53		YEL005C	VAB2	849	0	0		0.53		Subunit of the BLOC-1 complex involved in endosomal maturation; interacts with Vps21p-GFP; has potential role in vacuolar function, as suggested by its ability to bind Vac8p; likely member of; Vab2p-GFP-fusion localizes to cytoplasm in punctate pattern	.
	1-to-1	Anc_2.652	CAGL0F06765g		669	1.79372	0	0.54		YIR024C		651	0	0.01		0.53		Protein of unknown function; the authentic, non-tagged protein is detected in highly purified mitochondria in high-throughput studies; interacts with Arh1p, a mitochondrial oxidoreductase; deletion mutant has a respiratory growth defect	.
	1-to-1	Anc_6.101	CAGL0I00462g		750	0.133333	0	0.52		YLR301W	HRI1	735	0	0		0.52		Protein of unknown function that interacts with Sec72p and Hrr25p	.
	1-to-1	Anc_3.477	CAGL0D04950g		885	0	0	0.735		YPR139C	LOA1	903	0	0.22		0.515		Lysophosphatidic acid acyltransferase; involved in triacelglyceride homeostasis and lipid droplet formation; localized to lipid droplets and the ER; specificity for oleoyl-CoA	.
	1-to-1	Anc_1.491	CAGL0L01155g		447	4.1387	0	0.885		YEL048C	TCA17	459	0	0.37		0.515		Subunit of TRAPPII; TRAPPII is a multimeric GEF involved in intra-Golgi and endosome-to-Golgi transport; promotes association of TRAPPII-specific subunits with the core complex; sedlin related; human Sedlin mutations cause SEDT, a skeletal disorder	.
	1-to-1	Anc_1.226	CAGL0L05626g		159	0	0	0.55		YJL127C-B		159	0	0.035		0.515		Putative protein of unknown function; identified based on homology to the filamentous fungus, <i>Ashbya gossypii</i>	.
	1-to-1	Anc_2.619	CAGL0L05038g		1542	7.6524	0	0.505		YKL074C	MUD2	1584	0	0		0.505		Protein involved in early pre-mRNA splicing; component of the pre-mRNA-U1 snRNP complex, the commitment complex; interacts with Msl5p/BBP splicing factor and Sub2p; similar to metazoan splicing factor U2AF65	.
	1-to-1	Anc_6.290	CAGL0H00616g		1356	0	0	0.78		YPL254W	HFI1	1467	0	0.28		0.5		Adaptor protein required for structural integrity of the SAGA complex; a histone acetyltransferase-coactivator complex that is involved in global regulation of gene expression through acetylation and transcription functions	.
	1-to-1	Anc_6.323	CAGL0K09328g	THR4	1539	0	0	1		YCR053W	THR4	1545	0	0.975		0.025		Threonine synthase; conserved protein that catalyzes formation of threonine from O-phosphohomoserine; expression is regulated by the GCN4-mediated general amino acid control pathway	.
	1-to-1	Anc_3.181	CAGL0I04488g		2754	0.689906	0	1		YBR017C	KAP104	2757	0	0.96		0.04		Transportin or cytosolic karyopherin beta 2; functions in the rg-nuclear localization signal-mediated nuclear import/reimport of mRNA-binding proteins Nab2p and Hrp1p; regulates asymmetric protein synthesis in daughter cells during mitosis	.
	1-to-1	Anc_4.088	CAGL0E02937g		345	0.289855	0	1		YGL029W	CGR1	363	0	0.943106		0.0568942		Protein involved in nucleolar integrity and processing of pre-rRNA; has a role in processing rRNA for the 60S ribosome subunit; transcript is induced in response to cytotoxic stress but not genotoxic stress; relocalizes from nucleus to nucleolus upon DNA replication stress	.
	1-to-1	Anc_1.148	CAGL0L08110g		706	0	0	1		YJL189W	RPL39	542	0	0.943106		0.0568942		Ribosomal 60S subunit protein L39; required for ribosome biogenesis; loss of both Rpl31p and Rpl39p confers lethality; also exhibits genetic interactions with SIS1 and PAB1; homologous to mammalian ribosomal protein L39, no bacterial homolog	.
	1-to-1	Anc_4.384	CAGL0F09075g		2241	0	0	1		YHR205W	SCH9	2475	0	0.943106		0.0568942		AGC family protein kinase; functional ortholog of mammalian S6 kinase; phosphorylated by Tor1p and required for TORC1-mediated regulation of ribosome biogenesis, translation initiation, and entry into G0 phase; involved in transactivation of osmostress-responsive genes; regulates G1 progression, cAPK activity and nitrogen activation of the FGM pathway; integrates nutrient signals and stress signa…	.
	1-to-1	Anc_5.168	CAGL0I08833g		633	0.157978	0	1		YGR167W	CLC1	702	0	0.935		0.065		Clathrin light chain; subunit of the major coat protein involved in intracellular protein transport and endocytosis; thought to regulate clathrin function; the clathrin triskelion is a trimeric molecule composed of three heavy chains that radiate from a vertex and three light chains which bind noncovalently near the vertex of the triskelion	.
	1-to-1	Anc_8.507	CAGL0H07447g		2181	0	0	1		YBR156C	SLI15	2097	0	0.935		0.065		Subunit of the conserved chromosomal passenger complex (CPC); complex regulates kinetochore-microtubule attachments, activation of the spindle tension checkpoint, and mitotic spindle disassembly; other complex members are Ipl1p, Bir1p, and Nbl1p	.
	1-to-1	Anc_5.429	CAGL0A02772g		1326	0.980392	0	1		YDR364C	CDC40	1368	0	0.915		0.085		Pre-mRNA splicing factor; important for catalytic step II of pre-mRNA splicing and plays a role in cell cycle progression; required for DNA synthesis during mitosis and meiosis; has WD repeats	.
	1-to-1	Anc_3.349	CAGL0K12232g		783	0	0	1		YPR060C	ARO7	771	0	0.855		0.145		Chorismate mutase; catalyzes the conversion of chorismate to prephenate to initiate the tyrosine/phenylalanine-specific branch of aromatic amino acid biosynthesis	.
	1-to-1	Anc_7.405	CAGL0G03399g		1110	0	0	1		YER107C	GLE2	1098	0	0.815		0.185		RNA export factor associated with the nuclear pore complex (NPC); associates with NUP116p; required for polyadenylated RNA export but not for protein import; homologous to S. pombe Rae1p and human RAE1	.
	1-to-1	Anc_3.007	CAGL0B01419g	RIB4	507	0	0	1		YOL143C	RIB4	510	0	0.762101		0.237899		Lumazine synthase (DMRL synthase); catalyzes synthesis of immediate precursor to riboflavin; DMRL synthase stands for 6,7-dimethyl-8-ribityllumazine synthase	.
	1-to-1	Anc_8.441	CAGL0K11418g	ADK1	669	0	0	1		YDR226W	ADK1	669	0	0.555		0.445		Adenylate kinase, required for purine metabolism; localized to the cytoplasm and the mitochondria; lacks cleavable signal sequence; protein abundance increases in response to DNA replication stress	.
	1-to-1	Anc_4.237	CAGL0H05071g		3333	0	0	0.995528		YLR383W	SMC6	3345	0	0.815		0.180528		Component of the SMC5-SMC6 complex; this complex plays a key role in the removal of X-shaped DNA structures that arise between sister chromatids during DNA replication and repair; homologous to S. pombe rad18	.
	1-to-1	Anc_8.500	CAGL0L12804g		1182	0	0	0.995		YPL050C	MNN9	1188	0	0.935		0.06		Subunit of Golgi mannosyltransferase complex; this complex mediates elongation of the polysaccharide mannan backbone; forms a separate complex with Van1p that is also involved in backbone elongation; this complex also contains Anp1p, Mnn10p, Mnn11p, and Hoc1p	.
	1-to-1	Anc_1.533	CAGL0K00297g		1884	0	0	0.995		YKL212W	SAC1	1872	0	0.905		0.09		Phosphatidylinositol phosphate (PtdInsP) phosphatase; involved in hydrolysis of PtdIns[4]P in the early and medial Golgi; regulated by interaction with Vps74p; ER localized transmembrane protein which cycles through the Golgi; involved in protein trafficking and processing, secretion, and cell wall maintenance; regulates sphingolipid biosynthesis through the modulation of PtdIns(4)P metabolism	.
	1-to-1	Anc_8.595	CAGL0M06017g		1341	0	0	0.995		YBR166C	TYR1	1359	0	0.825		0.17		Prephenate dehydrogenase involved in tyrosine biosynthesis; expression is dependent on phenylalanine levels	.
	1-to-1	Anc_1.112	CAGL0J07766g		1224	0	0	0.99375		YNL248C	RPA49	1248	0	0.625		0.36875		RNA polymerase I subunit A49	.
	1-to-1	Anc_7.165	CAGL0L09449g		357	0.280112	0	0.985		YIR009W	MSL1	336	0	0.943106		0.0418942		U2B component of U2 snRNP; involved in splicing, binds the U2 snRNA stem-loop IV in vitro but requires association of Lea1p for in vivo binding; does not contain the conserved C-terminal RNA binding domain found in other family members	.
	1-to-1	Anc_1.208	CAGL0I04400g		648	31.8673	0	0.98		YJL140W	RPB4	666	0	0.915		0.065		RNA polymerase II subunit B32; forms two subunit dissociable complex with Rpb7p; involved in recruitment of 3'-end processing factors to transcribing RNA polymerase II complex and in export of mRNA to cytoplasm under stress conditions; also involved in translation initiation	.
	1-to-1	Anc_7.071	CAGL0F00693g	PRO2	1368	0	0	0.98		YOR323C	PRO2	1371	0	0.91		0.07		Gamma-glutamyl phosphate reductase; catalyzes the second step in proline biosynthesis	.
	1-to-1	Anc_3.513	CAGL0C03069g		837	0.238949	0	0.975		YER026C	CHO1	831	0	0.995		-0.02		Phosphatidylserine synthase; functions in phospholipid biosynthesis; catalyzes the reaction CDP-diaclyglycerol + L-serine = CMP + L-1-phosphatidylserine, transcriptionally repressed by myo-inositol and choline	.
	1-to-1	Anc_8.512	CAGL0H07513g	IFA38	1059	0	0	0.975		YBR159W	IFA38	1044	0	0.943106		0.0318942		Microsomal beta-keto-reductase; contains oleate response element (ORE) sequence in the promoter region; mutants exhibit reduced VLCFA synthesis, accumulate high levels of dihydrosphingosine, phytosphingosine and medium-chain ceramides	.
	1-to-1	Anc_8.733	CAGL0F03927g		1578	0	0	0.965		YMR217W	GUA1	1578	0	0.885		0.08		GMP synthase; highly conserved enzyme that catalyzes the second step in the biosynthesis of GMP from inosine 5'-phosphate (IMP); transcription is not subject to regulation by guanine but is negatively regulated by nutrient starvation; reduction-of-function mutation gua1-G388D causes changes in cellular guanine nucleotide pools, defects in general protein synthesis, and impaired translation of GCN…	.
	1-to-1	Anc_8.287	CAGL0M11484g		4740	0	0	0.965		YDR127W	ARO1	4767	0	0.85		0.115		Pentafunctional arom protein; catalyzes steps 2 through 6 in the biosynthesis of chorismate, which is a precursor to aromatic amino acids	.
	1-to-1	Anc_4.258	CAGL0C02607g		2034	0	0	0.96		YLR396C	VPS33	2076	0	0.84		0.12		ATP-binding protein that is a subunit of the HOPS and CORVET complexes; essential for protein sorting, vesicle docking, and fusion at the vacuole	.
	1-to-1	Anc_3.319	CAGL0F04279g		888	2.53378	0	0.955		YBL033C	RIB1	1038	0	0.785		0.17		GTP cyclohydrolase II; catalyzes the first step of the riboflavin biosynthesis pathway	.
	1-to-1	Anc_3.562	CAGL0H07799g		789	0	0	0.95		YGL240W	DOC1	753	0	0.91		0.04		Processivity factor; required for the ubiquitination activity of the anaphase promoting complex (APC), mediates the activity of the APC by contributing to substrate recognition; involved in cyclin proteolysis; contains a conserved DOC1 homology domain	.
	1-to-1	Anc_2.214	CAGL0J05456g		1116	0.179211	0	0.95		YNL080C	EOS1	1101	0	0.83		0.12		Protein involved in N-glycosylation; deletion mutation confers sensitivity to exidative stress and shows synthetic lethality with mutations in the spindle checkpoint genes BUB3 and MAD1; YNL080C is not an essential gene	.
	1-to-1	Anc_4.143	CAGL0F08701g		558	0	0	0.95		YGR006W	PRP18	756	0	0.495		0.455		Splicing factor and component of snRNP U5; factor involved in the positioning of the 3' splice site during the second catalytic step of splicing; interacts with Slu7p	.
	1-to-1	Anc_8.589	CAGL0M06105g		1743	0	0	0.94		YBR170C	NPL4	1743	0	0.87		0.07		Substrate-recruiting cofactor of the Cdc48p-Npl4p-Ufd1p segregase; assists Cdc48p in the dislocation of misfolded, polyubiquitinated ERAD substrates that are subsequently delivered to the proteasome for degradation; also involved in the regulated destruction of resident ER membrane proteins, such as HMG-CoA reductase (Hmg1/2p) and cytoplasmic proteins (Fbp1p); role in mobilizing membrane bound tr…	.
	1-to-1	Anc_3.013	CAGL0B01463g		705	0.851064	0	0.94		YOL142W	RRP40	723	0	0.465		0.475		Exosome non-catalytic core component; involved in 3'-5' RNA processing and degradation in both the nucleus and the cytoplasm; predicted to contain both S1 and KH RNA binding domains; has similarity to human hRrp40p (EXOSC3)	.
	1-to-1	Anc_8.371	CAGL0E00759g		1050	0	0	0.935		YDR173C	ARG82	1068	0	0.985		-0.05		Inositol polyphosphate multikinase (IPMK); sequentially phosphorylates Ins(1,4,5)P3 to form Ins(1,3,4,5,6)P5; also has diphosphoinositol polyphosphate synthase activity; regulates arginine-, phosphate-, and nitrogen-responsive genes	.
	1-to-1	Anc_8.835	CAGL0J06754g		1050	0	0	0.935		YML112W	CTK3	891	0	0.695		0.24		Gamma subunit of C-terminal domain kinase I; CTDK-I phosphorylates RNA polymerase II subunit Rpo21p to affect transcription and pre-mRNA 3' end processing, and also phosphorylates ribosomal protein Rps2p to increase translational fidelity; protein abundance increases in response to DNA replication stress	.
	1-to-1	Anc_3.448	CAGL0G07865g		801	0	0	0.93		YGR104C	SRB5	924	0	0.87		0.06		Subunit of the RNA polymerase II mediator complex; associates with core polymerase subunits to form the RNA polymerase II holoenzyme; essential for transcriptional regulation; required for proper termination of transcription for some genes; involved in telomere maintenance	.
	1-to-1	Anc_1.076	CAGL0L00297g		4158	0	0	0.925		YCR042C	TAF2	4224	0.0355114	0.855		0.07		TFIID subunit (150 kDa); involved in RNA polymerase II transcription initiation	.
	1-to-1	Anc_8.493	CAGL0L12694g		2421	0	0	0.925		YPL045W	VPS16	2397	0	0.785		0.14		Subunit of the HOPS and the CORVET complexes; part of the Class C Vps complex essential for membrane docking and fusion at Golgi-to-endosome and endosome-to-vacuole protein transport stages	.
	1-to-1	Anc_5.269	CAGL0J00649g		1074	0	0	0.91		YHR025W	THR1	1074	0	0.921208		-0.0112084		Homoserine kinase; conserved protein required for threonine biosynthesis; expression is regulated by the GCN4-mediated general amino acid control pathway	.
	1-to-1	Anc_4.218	CAGL0G04895g		531	5.64972	0	0.91		YLR370C	ARC18	537	0	0.835		0.075		Subunit of the ARP2/3 complex; ARP2/3 is required for the motility and integrity of cortical actin patches	.
	1-to-1	Anc_5.406	CAGL0L11550g		3219	0.55918	0	0.905		YHR102W	KIC1	3243	0	0.86		0.045		Protein kinase of the PAK/Ste20 family, required for cell integrity; physically interacts with Cdc31p (centrin), which is a component of the spindle pole body; part of the RAM network that regulates cellular polarity and morphogenesis	.
	1-to-1	Anc_2.318	CAGL0E05016g		1131	0	0	0.905		YGL148W	ARO2	1131	0	0.71		0.195		Bifunctional chorismate synthase and flavin reductase; catalyzes the conversion of 5-enolpyruvylshikimate 3-phosphate (EPSP) to form chorismate, which is a precursor to aromatic amino acids; protein abundance increases in response to DNA replication stress	.
	1-to-1	Anc_8.403	CAGL0G08382g		1356	0	0	0.905		YDR195W	REF2	1602	0	0.71		0.195		RNA-binding protein; involved in the cleavage step of mRNA 3'-end formation prior to polyadenylation, and in snoRNA maturation; part of holo-CPF subcomplex APT, which associates with 3'-ends of snoRNA- and mRNA-encoding genes; relocalizes to the cytosol in response to hypoxia	.
	1-to-1	Anc_8.761	CAGL0M04895g		3111	0.900032	0	0.895		YMR231W	PEP5/VPS11	3090	0	0.835		0.06		Histone E3 ligase, component of CORVET tethering complex; peripheral vacuolar membrane protein required for protein trafficking and vacuole biogenesis; interacts with Pep7p; involved in ubiquitylation and degradation of excess histones	.
	1-to-1	Anc_5.482	CAGL0K09460g		786	0	0	0.895		YOR145C	PNO1	825	0	0.71		0.185		Essential nucleolar protein required for pre-18S rRNA processing; interacts with Dim1p, an 18S rRNA dimethyltransferase, and also with Nob1p, which is involved in proteasome biogenesis; contains a KH domain	.
	1-to-1	Anc_2.233	CAGL0G08800g		3063	0.0326477	0	0.895		YIL128W	MET18	3099	0	0.49		0.405		Component of cytosolic iron-sulfur protein assembly (CIA) machinery; acts at a late step of Fe-S cluster assembly; forms the CIA targeting complex with Cia1p and Cia2p that directs Fe-S cluster incorporation into a subset of proteins involved in methionine biosynthesis, DNA replication and repair, transcription, and telomere maintenance; ortholog of human MMS19	.
	1-to-1	Anc_8.475	CAGL0J09482g		702	0	0	0.88		YPL024W	RMI1	726	0	0.86		0.02		Subunit of the RecQ (Sgs1p) - Topo III (Top3p) complex; stimulates superhelical relaxing and ssDNA binding activities of Top3p; involved in response to DNA damage; functions in S phase-mediated cohesion establishment via a pathway involving the Ctf18-RFC complex and Mrc1p; null mutants display increased rates of recombination and delayed S phase	.
	1-to-1	Anc_2.543	CAGL0K02541g		966	0	0	0.875		YHL011C	PRS3	963	0	0.735		0.14		5-phospho-ribosyl-1(alpha)-pyrophosphate synthetase; synthesizes PRPP, which is required for nucleotide, histidine, and tryptophan biosynthesis; one of five related enzymes, which are active as heteromultimeric complexes	.
	1-to-1	Anc_8.414	CAGL0G08470g		1953	1.07527	0	0.875		YLR234W	TOP3	1971	0	0.545		0.33		DNA Topoisomerase III; conserved protein that functions in a complex with Sgs1p and Rmi1p to relax single-stranded negatively-supercoiled DNA preferentially, involved in telomere stability and regulation of mitotic recombination	.
	1-to-1	Anc_7.367	CAGL0I05126g		1716	0.553613	0	0.87		YER086W	ILV1	1731	0	0.92		-0.05		Threonine deaminase, catalyzes first step in isoleucine biosynthesis; expression is under general amino acid control; ILV1 locus exhibits highly positioned nucleosomes whose organization is independent of known ILV1 regulation	.
	1-to-1	Anc_8.019	CAGL0F01551g		459	0	0	0.865		YLR068W	FYV7	456	0	0.59		0.275		Essential protein required for maturation of 18S rRNA; required for survival upon exposure to K1 killer toxin	.
	1-to-1	Anc_1.326	CAGL0J05060g	ZAP1	2142	2.14753	0	0.86		YJL056C	ZAP1	2643	0	0.81		0.05		Zinc-regulated transcription factor; binds to zinc-responsive promoters to induce transcription of certain genes in presence of zinc, represses other genes in low zinc; regulates its own transcription; contains seven zinc-finger domains	.
	1-to-1	Anc_2.207	CAGL0J05544g		1047	0	0	0.859282		YNL084C	END3	1050	0	0.365		0.494282		EH domain-containing protein involved in endocytosis; actin cytoskeletal organization and cell wall morphogenesis; forms a complex with Sla1p and Pan1p	.
	1-to-1	Anc_2.266	CAGL0D01122g		1518	0	0	0.845		YNL048W	ALG11	1647	0	0.895		-0.05		Alpha-1,2-mannosyltransferase; catalyzes sequential addition of the two terminal alpha 1,2-mannose residues to the Man5GlcNAc2-PP-dolichol intermediate during asparagine-linked glycosylation in the ER	.
	1-to-1	Anc_3.241	CAGL0I04686g		891	0	0	0.84		YBR039W	ATP3	936	0	0.35		0.49		Gamma subunit of the F1 sector of mitochondrial F1F0 ATP synthase; F1F0 ATP synthase is a large, evolutionarily conserved enzyme complex required for ATP synthesis	.
	1-to-1	Anc_2.586	CAGL0M13035g		1779	7.16695	0	0.81		YKL054C	DEF1	2217	0	0.76		0.05		RNAPII degradation factor; forms a complex with Rad26p in chromatin, enables ubiquitination and proteolysis of RNAPII present in an elongation complex; mutant is deficient in Zip1p loading onto chromosomes during meiosis	.
	1-to-1	Anc_2.248	CAGL0J10054g		2265	0	0	0.795		YNL059C	ARP5	2268	0	0.745		0.05		Nuclear actin-related protein involved in chromatin remodeling; component of chromatin-remodeling enzyme complexes	.
	1-to-1	Anc_3.257	CAGL0K11792g		2655	0	0	0.785		YDR027C	VPS54	2670	0	0.955		-0.17		Component of the GARP (Golgi-associated retrograde protein) complex; this complex is required for the recycling of proteins from endosomes to the late Golgi; potentially phosphorylated by Cdc28p; other members of the GARP complex are Vps51p-Vps52p-Vps53p-Vps54p	.
	1-to-1	Anc_1.441	CAGL0M03355g		1749	0	0	0.785		YEL013W	VAC8	1737	0	0.35		0.435		Phosphorylated and palmitoylated vacuolar membrane protein; interacts with Atg13p, required for the cytoplasm-to-vacuole targeting (Cvt) pathway; interacts with Nvj1p to form nucleus-vacuole junctions	.
	1-to-1	Anc_8.401	CAGL0G08360g	VPS34	2670	0.224719	0	0.775		YLR240W	VPS34	2628	0	0.845		-0.07		Phosphatidylinositol (PI) 3-kinase that synthesizes PI-3-phosphate; forms membrane-associated signal transduction complex with Vps15p to regulate protein sorting; activated by the GTP-bound form of Gpa1p; a fraction is localized, with Vps15p, to nuclear pores at nucleus-vacuole junctions and may facilitate transcription elongation for genes positioned at the nuclear periphery	.
	1-to-1	Anc_1.163	CAGL0M11374g		2955	5.73604	0	0.765		YJL176C	SWI3	2478	0	0.93		-0.165		Subunit of the SWI/SNF chromatin remodeling complex; SWI/SNF regulates transcription by remodeling chromosomes; contains SANT domain that is required for SWI/SNF assembly; is essential for displacement of histone H2A-H2B dimers during ATP-dependent remodeling; required for transcription of many genes, including ADH1, ADH2, GAL1, HO, INO1 and SUC2; relocates to the cytosol under hypoxic conditions	.
	1-to-1	Anc_4.011	CAGL0E03872g		675	0.592593	0	0.745		YHL031C	GOS1	672	0	0.295		0.45		v-SNARE protein involved in Golgi transport; homolog of the mammalian protein GOS-28/GS28	.
	1-to-1	Anc_3.519	CAGL0C02497g		498	0	0	0.74		YER029C	SMB1	591	0	0.35		0.39		Core Sm protein Sm B; part of heteroheptameric complex (with Smd1p, Smd2p, Smd3p, Sme1p, Smx3p, and Smx2p) that is part of the spliceosomal U1, U2, U4, and U5 snRNPs; homolog of human Sm B and Sm B'	.
	1-to-1	Anc_8.212	CAGL0K10076g		3027	4.4929	0	0.735		YDR080W	VPS41	2979	0	0.365		0.37		Vacuolar membrane protein that is a subunit of the HOPS complex; essential for membrane docking and fusion at the Golgi-to-endosome and endosome-to-vacuole stages of protein transport; the homotypic vacuole fusion and vacuole protein sorting complex is also known as the HOPS complex	.
	1-to-1	Anc_4.208	CAGL0G04983g		255	0	0	0.72		YLR363W-A		258	0	0.29		0.43		Protein of unknown function; green fluorescent protein (GFP)-fusion protein localizes to the nucleus; relocalizes from nucleus to nucleolus upon DNA replication stress	.
	1-to-1	Anc_7.011	CAGL0J07238g	RPS12	429	0	0	0.675		YOR369C	RPS12	432	0	0.36		0.315		Protein component of the small (40S) ribosomal subunit; homologous to mammalian ribosomal protein S12, no bacterial homolog	.
	1-to-1	Anc_8.536	CAGL0H05269g		999	0	0	0.67		YPL069C	BTS1	1008	0	0.69		-0.02		Geranylgeranyl diphosphate synthase; increases the intracellular pool of geranylgeranyl diphosphate, suppressor of bet2 mutation that causes defective geranylgeranylation of small GTP-binding proteins that mediate vesicular traffic	.
	1-to-1	Anc_1.360	CAGL0K10384g		6315	1.13222	0	0.66		YFR019W	FAB1	6837	0	0.73		-0.07		1-phosphatidylinositol-3-phosphate 5-kinase; vacuolar membrane kinase that generates phosphatidylinositol (3,5)P2, which is involved in vacuolar sorting and homeostasis	.
	1-to-1	Anc_7.078	CAGL0H06149g		2622	1.22044	0	0.66		YAL021C	CCR4	2514	0	0.175		0.485		Component of the CCR4-NOT transcriptional complex; CCR4-NOT is involved in regulation of gene expression; component of the major cytoplasmic deadenylase, which is involved in mRNA poly(A) tail shortening	.
	1-to-1	Anc_1.283	CAGL0H06809g		444	0	0	0.645		YKR020W	VPS51	495	0	0.92		-0.275		Component of the GARP (Golgi-associated retrograde protein) complex; this complex is required for the recycling of proteins from endosomes to the late Golgi; links the (VFT/GARP) complex to the SNARE Tlg1p; other members of the GARP complex are Vps51p-Vps52p-Vps53p-Vps54p,	.
	1-to-1	Anc_3.102	CAGL0F05181g		1839	0	0	0.645		YDR484W	VPS52	1926	0	0.88		-0.235		Component of the GARP (Golgi-associated retrograde protein) complex; this complex is required for the recycling of proteins from endosomes to the late Golgi; involved in localization of actin and chitin; members of the GARP complex are Vps51p-Vps52p-Vps53p-Vps54p	.
	1-to-1	Anc_6.316	CAGL0L10846g		822	0.243309	0	0.625		YCR047C	BUD23	828	0	0.165		0.46		Methyltransferase; methylates residue G1575 of 18S rRNA; required for rRNA processing and nuclear export of 40S ribosomal subunits independently of methylation activity; diploid mutant displays random budding pattern	.
	1-to-1	Anc_5.278	CAGL0J00473g		1098	0	0	0.62		YHR052W	CIC1	1131	0	0.955		-0.335		Essential protein that interacts with proteasome components; has a potential role in proteasome substrate specificity; also copurifies with 66S pre-ribosomal particles	.
	1-to-1	Anc_3.240	CAGL0D04378g		3162	0	0	0.615		YDR017C	KCS1	3153	0	0.53		0.085		Inositol hexakisphosphate and inositol heptakisphosphate kinase; generation of high energy inositol pyrophosphates by Kcs1p is required for many processes such as vacuolar biogenesis, stress response, and telomere maintenance; inositol hexakisphosphate is also known as IP6; inositol heptakisphosphate is also known as IP7	.
	1-to-1	Anc_5.388	CAGL0H02057g		669	18.012	0	0.59		YHR089C	GAR1	618	0	0.54		0.05		Protein component of the H/ACA snoRNP pseudouridylase complex; involved in the modification and cleavage of the 18S pre-rRNA	.
	1-to-1	Anc_4.305	CAGL0J04752g		3918	1.11026	0	0.585		YLR425W	TUS1	3924	0	0.77		-0.185		Guanine nucleotide exchange factor (GEF) that modulate Rho1p activity; involved in the cell integrity signaling pathway; interacts with Rgl1p; localization of Tus1p to the bed neck is regulated by Rgl1p; multicopy suppressor of tor2 mutation and ypk1 ypk2 double mutation; potential Cdc28p substrate	.
	1-to-1	Anc_2.023	CAGL0K05027g		1299	0	0	0.57		YNL220W	ADE12	1302	0	0.13		0.44		Adenylosuccinate synthase; catalyzes the first step in synthesis of adenosine monophosphate from inosine 5'monophosphate during purine nucleotide biosynthesis; exhibits binding to single-stranded autonomously replicating (ARS) core sequence	.
	1-to-1	Anc_8.815	CAGL0H02343g		537	0	0	0.555		YMR263W	SAP30	606	0	0.21		0.345		Component of Rpd3L histone deacetylase complex; involved in silencing at telomeres, rDNA, and silent mating-type loci; involved in telomere maintenance	.
	1-to-1	Anc_4.314	CAGL0M00946g		633	0	0	0.55		YLR435W	TSR2	618	0	0.73		-0.18		Protein with a potential role in pre-rRNA processing	.
	1-to-1	Anc_1.261	CAGL0L03047g		2148	0	0	0.54		YKR024C	DBP7	2229	0	0.12		0.42		Putative ATP-dependent RNA helicase of the DEAD-box family; involved in ribosomal biogenesis; essential for growth under anaerobic conditions	.
	1-to-1	Anc_8.753	CAGL0M04807g	SNF2	5193	0.982091	0	0.535		YOR290C	SNF2	5112	0	0.87		-0.335		Catalytic subunit of the SWI/SNF chromatin remodeling complex; involved in transcriptional regulation; contains DNA-stimulated ATPase activity; functions interdependently in transcriptional activation with Snf5p and Snf6p	.
	1-to-1	Anc_8.322	CAGL0M04257g		822	0	0	0.53		YLR128W	DCN1	904	0	0.64		-0.11		Scaffold-type E3 ligase; required for cullin neddylation and ubiquitin ligase activation; contains a ubiquitin-binding domain (UBA) for ubiquitin and Nedd8 (Rub1p) interaction and a PONY domain involved in cullin binding and neddylation	.
	1-to-1	Anc_1.499	CAGL0D06094g		477	0	0	0.525		YJR055W	HIT1	495	0	0.235		0.29		Protein of unknown function; required for growth at high temperature	.
	1-to-1	Anc_8.618	CAGL0J06864g		633	0.157978	0	0.505		YPL121C	MEI5	669	0	0.35		0.155		Meiosis-specific protein involved in meiotic recombination; involved in DMC1-dependent meiotic recombination; forms heterodimer with Sae3p; proposed to be an assembly factor for Dmc1p	.
	1-to-1	Anc_2.425	CAGL0D02002g		1662	2.04573	0	0.46		YKL139W	CTK1	1587	0	0.91		-0.45		Catalytic (alpha) subunit of C-terminal domain kinase I (CTDK-I); phosphorylates both RNA pol II subunit Rpo21p to affect transcription and pre-mRNA 3' end processing, and ribosomal protein Rps2p to increase translational fidelity; required for H3K36 trimethylation but not dimethylation by Set2p; similar to the Drosophila dCDK12 and human CDK12 and probably CDK13	.
	1-to-1	Anc_8.172	CAGL0K01969g		571	4.20315	0	0.435		YBL025W	RRN10	438	0	0.765		-0.33		Protein involved in promoting high level transcription of rDNA; subunit of UAF (upstream activation factor) for RNA polymerase I	.
	1-to-1	Anc_1.153	CAGL0L08068g		549	0	0	0.19		YCR028C-A	RIM1	491	0	0.61		-0.42		ssDNA-binding protein essential for mitochondrial genome maintenance; involved in mitochondrial DNA replication	.
	1-to-1	Anc_7.239	CAGL0J02926g	PET117	384	0.130208	0	0.19		YER058W	PET117	324	0	0.6		-0.41		Protein required for assembly of cytochrome c oxidase	.
	1-to-1	Anc_6.006	CAGL0A01111g		210	0	0	0.19		YPL271W	ATP15	189	0	0.535		-0.345		Epsilon subunit of the F1 sector of mitochondrial F1F0 ATP synthase; which is a large, evolutionarily conserved enzyme complex required for ATP synthesis; F1 translationally regulates ATP6 and ATP8 expression to achieve a balanced output of ATP synthase genes encoded in nucleus and mitochondria; phosphorylated	.
	1-to-1	Anc_5.542	CAGL0H04763g		1152	0.0868056	0	0.2		YDR432W	NPL3	1245	0	0.525		-0.325		RNA-binding protein; promotes elongation, regulates termination, and carries poly(A) mRNA from nucleus to cytoplasm; has a role in repressing translation initiation by binding eIF4G; required for pre-mRNA splicing; may have a role in telomere maintenance; dissociation from mRNAs promoted by Mtr10p; phosphorylated by Sky1p in the cytoplasm; protein abundance increases in response to DNA replicatio…	.
	1-to-1	Anc_8.519	CAGL0M07271g		450	0	0	0.125		YPL059W	GRX5	453	0	0.5		-0.375		Glutathione-dependent oxidoreductase; hydroperoxide and superoxide-radical responsive; mitochondrial matrix protein involved in the synthesis/assembly of iron-sulfur centers; monothiol glutaredoxin subfamily member along with Grx3p and Grx4p	.
	1-to-1	Anc_5.299	CAGL0D04136g		711	0	0	0.01		YHR041C	SRB2	734	0	0.5		-0.49		Subunit of the RNA polymerase II mediator complex; associates with core polymerase subunits to form the RNA polymerase II holoenzyme; general transcription factor involved in telomere maintenance	.
	1-to-1	Anc_2.432	CAGL0D02112g		2286	0.874891	0	0.06		YKL134C	OCT1	2319	0	0.015		0.045		Mitochondrial intermediate peptidase; cleaves destabilizing N-terminal residues of a subset of proteins upon import, after their cleavage by mitochondrial processing peptidase (Mas1p-Mas2p); may contribute to mitochondrial iron homeostasis	.
[truncated: 5,048 more rows]

## Sheet: groups
	Cg-to-Sc	No.	Anc No.	Cg total	Sc total	Cg Ess	Sc Ess	Cg:Sc Ess	SGD Ess	SGD:Sc Ess	Cg Ess %	Sc Ess %	Cg:Sc Ess %	SGD:Sc Ess %
[truncated: 9 more rows]
